# Supplementary material for: Chemodivergent synthesis of N-(pyridin-2-yl)amides and 3-bromoimidazo[1,2-a]pyridines from α-bromoketones and 2-aminopyridines
Source: Royal Society of Chemistry journal article supplement (doi:10.1039/c9ra06724h), 2019-01-01

## *Supporting Information*

# **Chemodivergent Synthesis of *N*-(Pyridin-2-yl)amides and 3-Bromoimidazo[1,2-*a*]pyridines from $\alpha$ -Bromoketones and 2-Aminopyridines**

Yanpeng Liu,<sup>a,b</sup> Lixue Lu,<sup>a</sup> Haipin Zhou,<sup>c</sup> Feijie Xu,<sup>a</sup> Cong Ma,<sup>d</sup> Zhangjian Huang,<sup>a</sup> Jinyi Xu,<sup>\*a</sup> Shengtao Xu<sup>\*a</sup>

<sup>a</sup>*State Key Laboratory of Natural Medicines and Department of Medicinal Chemistry, China Pharmaceutical University, 24 Tong Jia Xiang, Nanjing 210009, China*

<sup>b</sup>*Department of Chemistry, City University of Hong Kong, 83 Tat Chee Avenue, Hong Kong SAR (P.R. China)*

<sup>c</sup>*College of Materials & Chemical Engineering, Chuzhou University, Chuzhou 239000, China*

<sup>d</sup>*State Key Laboratory of Chemical Biology and Drug Discovery, and Department of Applied Biology and Chemical Technology, The Hong Kong Polytechnic University, Kowloon, Hong Kong SAR (P.R. China)*

## **Content**

|                                                     |    |
|-----------------------------------------------------|----|
| General Information.....                            | 2  |
| Experimental Section.....                           | 2  |
| Spectral and Analytical Data .....                  | 2  |
| <sup>1</sup> H and <sup>13</sup> C NMR spectra..... | 22 |

## General Information

All chemicals were of chemical pure grade quality and used without further purification, ethyl acetate and toluene was analytical pure grade quality and without further drying, *tert*-butyl hydroperoxide (TBHP) was 70% aqueous solution purchased from Sinopharm Chemical Reagent Co.,Ltd. Reactions were monitored by TLC (Merck silica gel 60 F<sub>254</sub>), column chromatography was performed on silica gel 200~300 mesh. All <sup>1</sup>H NMR (300 MHz), <sup>13</sup>C{<sup>1</sup>H} NMR (75 MHz) spectra were recorded on a Bruker Avance 300 spectrometer in CDCl<sub>3</sub> with tetramethylsilane as an internal standard and reported in parts per million (ppm,  $\delta$ ). Low- and high-resolution mass spectrums (LRMS and HRMS) were measured on Finnigan MAT 95 spectrometer (Finnigan, Germany).

## Experimental Section

### General Procedure for the Synthesis of *N*-(pyridin-2-yl)amides

To a stirred solution of  $\alpha$ -bromoketone **1** (0.3 mmol, 1.0 equivalent), 2-aminopyridine **2** (0.45 mmol, 1.5 equivalents) and I<sub>2</sub> (0.06 mmol, 0.2 equivalents) in toluene, was added *tert*-butyl hydroperoxide (TBHP) (1.2 mmol, 4 equivalents). The solution was reflux at 100 °C for 2 h and monitored by thin layer chromatography. The reaction mixture was cooled to room temperature and added saturated sodium thiosulfate, then the organic layer was separated and extracted with ethyl acetate for 3 times. The combined organic layer was dried over anhydrous Na<sub>2</sub>SO<sub>4</sub> and concentrated under reduced pressure. The residue was purified by column chromatography on silica gel (petroleum ether/ethyl acetate as the eluent, typically 100:5-100:10) to furnish the *N*-(pyridin-2-yl)amides (**3**).

### General Procedure for the Synthesis of 3-Bromo-imidazo[1,2-*a*]pyridines

To a stirred solution of  $\alpha$ -bromoketone **1** (0.3 mmol, 1.0 equivalent) and 2-aminopyridine **2** (0.45 mmol, 1.5 equivalents) in ethyl acetate, was added *tert*-butyl hydroperoxide (TBHP) (0.6 mmol, 2 equivalents). The solution was reflux at 90 °C for 3 h and monitored by thin layer chromatography. The reaction mixture was cooled to room temperature and added saturated sodium thiosulfate, then the organic layer was separated and extracted with ethyl acetate for 3 times. The combined organic layer was dried over anhydrous Na<sub>2</sub>SO<sub>4</sub> and concentrated under reduced pressure. The residue was purified by column chromatography on silica gel (petroleum ether/ethyl acetate as the eluent, typically 100:5-100:10) to furnish the 3-bromo-imidazo[1,2-*a*]pyridines (**4**).

## Spectral and Analytical Data

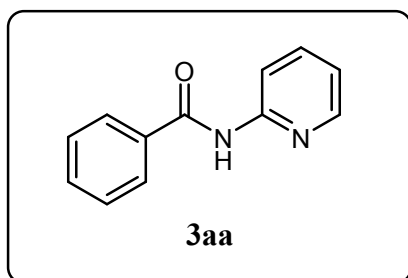

***N*-(Pyridin-2-yl)benzamide (3aa)**. White solid; m.p. 85-87 °C; 52.3 mg, yield: 88%; <sup>1</sup>H NMR (300 MHz, CDCl<sub>3</sub>): δ 8.83 (s, 1H), 8.28 (d, *J* = 8.4 Hz, 1H), 8.09 (d, *J* = 4.9 Hz, 1H), 7.81 (d, *J* = 7.4 Hz, 2H), 7.63 (t, *J* = 7.9 Hz, 1H), 7.47-7.42 (m, 1H), 7.39-7.34 (m, 2H), 6.93 (t, *J* = 6.2 Hz, 1H); <sup>13</sup>C NMR (75 MHz, CDCl<sub>3</sub>): δ 166.0, 151.8, 148.0, 138.6, 134.4, 132.3, 128.9, 127.4, 120.0, 114.4; HR-MS (ESI-TOF) *m/z*: calcd for C<sub>12</sub>H<sub>11</sub>N<sub>2</sub>O [M+H]<sup>+</sup> 199.0866, found 199.0861.

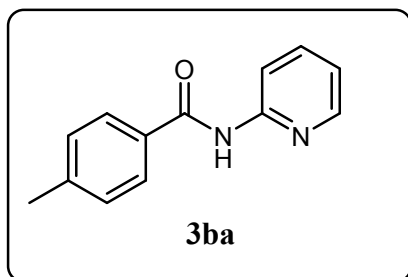

**4-Methyl-*N*-(pyridin-2-yl)benzamide (3ba)**. White solid; m.p. 94-96 °C; 59.2 mg, yield: 93%; <sup>1</sup>H NMR (300 MHz, CDCl<sub>3</sub>): δ 8.79 (s, 1H), 8.41 (d, *J* = 8.4 Hz, 1H), 8.28-8.26 (m, 1H), 7.86-7.82 (m, 2H), 7.80-7.74 (m, 1H), 7.32-7.27 (m, 2H), 7.09-7.05 (m, 1H), 2.44 (s, 3H); <sup>13</sup>C NMR (75 MHz, CDCl<sub>3</sub>): δ 165.8, 151.8, 147.9, 143.0, 138.6, 131.5, 129.6, 127.4, 119.9, 114.3, 21.7; HR-MS (ESI-TOF) *m/z*: calcd for C<sub>13</sub>H<sub>13</sub>N<sub>2</sub>O [M+H]<sup>+</sup> 213.1022, found 213.1018.

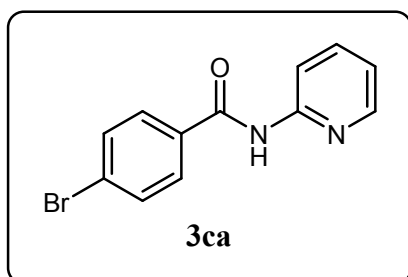

**4-Bromo-*N*-(pyridin-2-yl)benzamide (3ca)**. White solid; m.p. 133-136 °C; 75.7 mg, yield: 91%; <sup>1</sup>H NMR (300 MHz, CDCl<sub>3</sub>): δ 8.82 (s, 1H), 8.36 (d, *J* = 8.4 Hz, 1H), 8.24-8.22 (m, 1H), 7.82-7.73 (m, 3H), 7.65-7.61 (m, 2H), 7.09-7.05 (m, 1H); <sup>13</sup>C NMR (75 MHz, CDCl<sub>3</sub>): δ 164.9, 151.5, 148.0, 138.7, 133.3, 132.2, 129.0, 127.2, 120.3, 114.4; HR-MS (ESI-TOF) *m/z*: calcd for C<sub>12</sub>H<sub>10</sub>BrN<sub>2</sub>O [M+H]<sup>+</sup> 276.9971, found 276.9976.

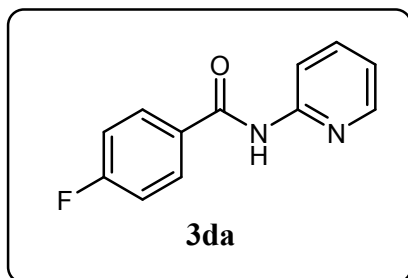

**4-Fluoro-*N*-(pyridin-2-yl)benzamide (3da).** White solid; m.p. 126-128 °C; 51.2 mg, yield: 79%; <sup>1</sup>H NMR (300 MHz, CDCl<sub>3</sub>): δ 9.34 (s, 1H), 8.37 (d, *J* = 8.4 Hz, 1H), 8.10 (d, *J* = 4.8 Hz, 1H), 7.96-7.92 (m, 2H), 7.76-7.70 (m, 1H), 7.12 (t, *J* = 8.6 Hz, 2H), 7.02 (m, 1H); <sup>13</sup>C NMR (75 MHz, CDCl<sub>3</sub>): δ 165.2 (d, *J* = 251.3 Hz), 165.1, 151.8, 147.8, 138.7, 130.7 (d, *J* = 3.2 Hz), 129.9 (d, *J* = 9.2 Hz), 120.1, 115.9 (d, *J* = 22.0 Hz), 114.6; HR-MS (ESI-TOF) *m/z*: calcd for C<sub>12</sub>H<sub>10</sub>FN<sub>2</sub>O [M+H]<sup>+</sup> 217.0772, found 217.0778.

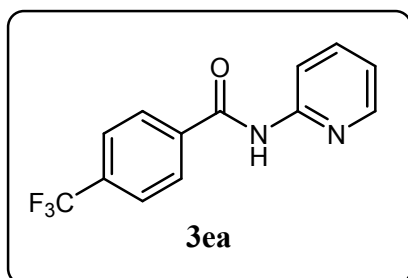

***N*-(Pyridin-2-yl)-4-(trifluoromethyl)benzamide (3ea).** White solid; m.p. 137-38 °C; 71.1 mg, yield: 89%; <sup>1</sup>H NMR (300 MHz, CDCl<sub>3</sub>): δ 9.46 (s, 1H), 8.39 (d, *J* = 8.4 Hz, 1H), 8.11-8.09 (m, 1H), 8.04 (d, *J* = 8.1 Hz, 2H), 7.78-7.70 (m, 3H), 7.04 (m, 1H); <sup>13</sup>C NMR (75 MHz, CDCl<sub>3</sub>): δ 164.9, 151.6, 147.8, 138.9, 137.8, 133.9 (q, *J* = 32.8 Hz), 128.0, 128.0 (q, *J* = 368.25 Hz), 125.9 (q, *J* = 3.7 Hz), 120.4, 114.7; HR-MS (ESI-TOF) *m/z*: calcd for C<sub>13</sub>H<sub>10</sub>F<sub>3</sub>N<sub>2</sub>O [M+H]<sup>+</sup> 267.0740, found 267.0743.

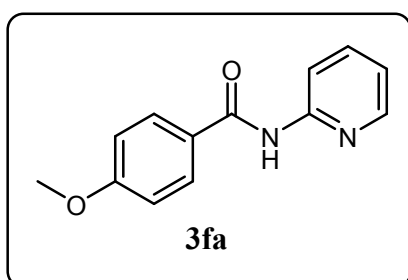

**4-Methoxy-*N*-(pyridin-2-yl)benzamide (3fa).** White solid; m.p. 104-106 °C; 61.6 mg, yield: 90%; <sup>1</sup>H NMR (300 MHz, CDCl<sub>3</sub>): δ 9.07 (s, 1H), 8.39 (d, *J* = 8.4 Hz, 1H), 8.20 (d, *J* = 4.4 Hz, 1H), 7.92 (d, *J* = 8.9 Hz, 2H), 7.77-7.71 (m, 1H), 7.05-7.01 (m, 1H), 6.96 (d, *J* = 8.9 Hz, 2H), 3.86 (s, 3H); <sup>13</sup>C NMR (75 MHz, CDCl<sub>3</sub>): δ 165.5, 162.9, 152.0, 147.8, 138.6, 129.4, 126.5, 119.7, 114.4, 114.1, 55.6; HR-MS (ESI-TOF) *m/z*: calcd for C<sub>13</sub>H<sub>13</sub>N<sub>2</sub>O<sub>2</sub> [M+H]<sup>+</sup> 229.0972, found 229.0975.

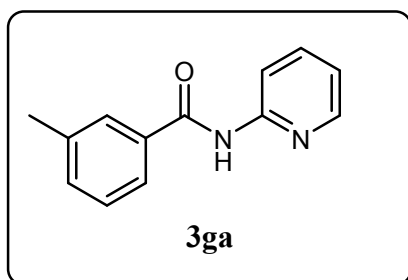

**3-Methyl-N-(pyridin-2-yl)benzamide (3ga).** White solid; m.p. 82-84°C; 49.0 mg, yield: 77%; <sup>1</sup>H NMR (300 MHz, CDCl<sub>3</sub>): δ 9.06 (s, 1H), 8.41 (d, *J* = 8.5 Hz, 1H), 8.18 (d, *J* = 4.7 Hz, 1H), 7.78-7.70 (m, 3H), 7.36 (d, *J* = 4.5 Hz, 2H), 7.06-7.01 (m, 1H), 2.40 (s, 3H); <sup>13</sup>C NMR (75 MHz, CDCl<sub>3</sub>): δ 166.2, 151.9, 147.9, 138.8, 138.6, 134.4, 133.0, 128.8, 128.1, 124.4, 119.9, 114.4, 21.4; HR-MS (ESI-TOF) *m/z*: calcd for C<sub>13</sub>H<sub>13</sub>N<sub>2</sub>O [M+H]<sup>+</sup> 213.1022, found 213.1026.

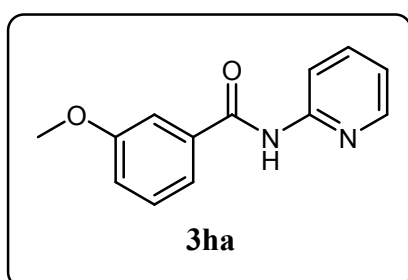

**3-Methoxy-N-(pyridin-2-yl)benzamide (3ha).** White semisolid; 54.8 mg, yield: 80%; <sup>1</sup>H NMR (300 MHz, CDCl<sub>3</sub>): δ 9.63 (s, 1H), 8.41-8.36 (m, 1H), 8.03-8.01 (m, 1H), 7.72-7.66 (m, 1H), 7.47-7.43 (m, 2H), 7.32-7.27 (m, 1H), 7.06-6.94 (m, 2H), 3.77 (s, 3H); <sup>13</sup>C NMR (75 MHz, CDCl<sub>3</sub>): δ 166.1, 159.8, 151.9, 147.7, 138.4, 135.8, 129.7, 119.8, 119.3, 118.4, 114.5, 112.5, 55.3; HR-MS (ESI-TOF) *m/z*: calcd for C<sub>13</sub>H<sub>13</sub>N<sub>2</sub>O<sub>2</sub> [M+H]<sup>+</sup> 229.0972, found 229.0974.

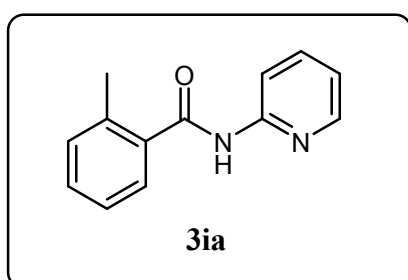

**2-Methyl-N-(pyridin-2-yl)benzamide (3ia).** White solid; m.p. 89-92°C; 50.9 mg, yield: 80%; <sup>1</sup>H NMR (300 MHz, CDCl<sub>3</sub>): δ 9.17 (s, 1H), 8.27 (d, *J* = 8.3 Hz, 1H), 7.65-7.58 (m, 2H), 7.41-7.37 (m, 1H), 7.28-7.22 (m, 1H), 7.15-7.09 (m, 2H), 6.85-6.80 (m, 1H), 2.39 (s, 3H); <sup>13</sup>C NMR (75 MHz, CDCl<sub>3</sub>): δ 168.7, 151.9, 147.8, 138.6, 136.6, 136.2, 131.4, 130.6, 127.1, 126.1, 119.9, 114.3, 20.0; HR-MS (ESI-TOF) *m/z*: calcd for C<sub>13</sub>H<sub>13</sub>N<sub>2</sub>O [M+H]<sup>+</sup> 213.1022, found 213.1024.

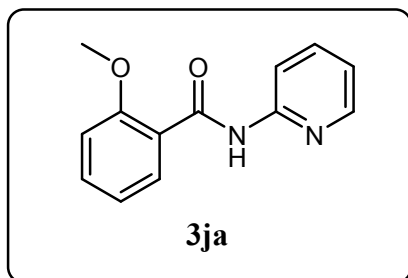

**2-Methoxy-*N*-(pyridin-2-yl)benzamide (3ja).** White solid; m.p. 81-83 °C; 60.3 mg, yield: 88%; <sup>1</sup>H NMR (300 MHz, CDCl<sub>3</sub>): δ 10.36 (s, 1H), 8.44 (d, *J* = 8.4 Hz, 1H), 8.33 (d, *J* = 3.3 Hz, 1H), 8.27 (dd, *J*<sub>1</sub> = 7.9 Hz, *J*<sub>2</sub> = 1.9 Hz, 1H), 7.77-7.71 (m, 1H), 7.55-7.49 (m, 1H), 7.13 (t, *J* = 7.6 Hz, 1H), 7.06 (m, 1H), 7.03 (s, 1H), 4.09 (s, 3H); <sup>13</sup>C NMR (75 MHz, CDCl<sub>3</sub>): δ 163.8, 157.7, 152.1, 148.0, 138.4, 133.8, 132.6, 121.6, 121.5, 119.8, 114.9, 111.7, 56.3; HR-MS (ESI-TOF) *m/z*: calcd for C<sub>13</sub>H<sub>13</sub>N<sub>2</sub>O<sub>2</sub> [M+H]<sup>+</sup> 229.0972, found 229.0967.

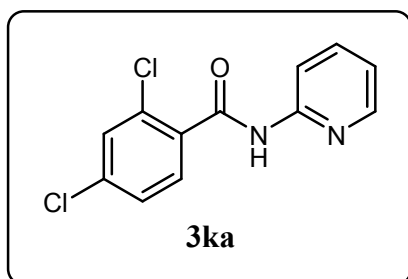

**2,4-Dichloro-*N*-(pyridin-2-yl)benzamide (3ka).** White solid; m.p. 123-125 °C; 63.3 mg, yield: 79%; <sup>1</sup>H NMR (300 MHz, CDCl<sub>3</sub>): δ 10.18 (s, 1H), 8.39-8.35 (m, 1H), 7.78-7.67 (m, 2H), 7.60-7.56 (m, 1H), 7.40 (s, 1H), 7.33-7.29 (m, 1H), 6.99-6.93 (m, 1H); <sup>13</sup>C NMR (75 MHz, CDCl<sub>3</sub>): δ 164.6, 151.5, 147.3, 138.8, 137.2, 134.0, 132.1, 130.7, 130.2, 127.6, 120.2, 114.8; HR-MS (ESI-TOF) *m/z*: calcd for C<sub>12</sub>H<sub>9</sub>Cl<sub>2</sub>N<sub>2</sub>O [M+H]<sup>+</sup> 267.0086, found 267.0092.

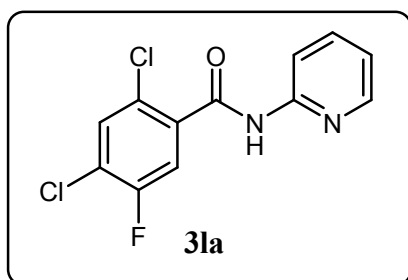

**2,4-Dichloro-5-fluoro-*N*-(pyridin-2-yl)benzamide (3la).** White solid; m.p. 100-102 °C; 65.0 mg, yield: 76%; <sup>1</sup>H NMR (300 MHz, CDCl<sub>3</sub>): δ 9.77 (s, 1H), 8.32 (d, *J* = 8.4 Hz, 1H), 7.92 (d, *J* = 4.9 Hz, 1H), 7.79-7.73 (m, 1H), 7.52-7.45 (m, 2H), 7.02 (t, *J* = 6.2 Hz, 1H); <sup>13</sup>C NMR (75 MHz, CDCl<sub>3</sub>): δ 163.1, 156.9 (d, *J* = 252.4 Hz), 151.3, 147.5, 138.9, 135.1 (d, *J* = 5.9 Hz), 132.1, 126.5 (d, *J* = 4.1 Hz), 124.5 (d, *J* = 19.3 Hz), 120.5, 117.9 (d, *J* = 24.1 Hz), 114.9; HR-MS (ESI-TOF) *m/z*: calcd for C<sub>12</sub>H<sub>8</sub>Cl<sub>2</sub>FN<sub>2</sub>O [M+H]<sup>+</sup> 284.9992, found 284.9997.

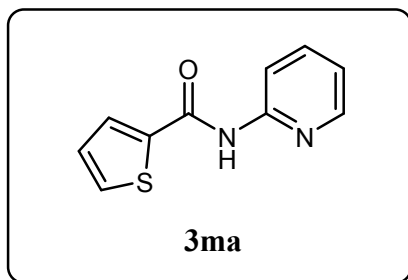

***N*-(Pyridin-2-yl)thiophene-2-carboxamide (3ma)**. White solid; m.p. 125-127 °C; 42.9 mg, yield: 70%; <sup>1</sup>H NMR (300 MHz, CDCl<sub>3</sub>): δ 9.05 (s, 1H), 8.34-8.21 (m, 2H), 7.74-7.66 (m, 2H), 7.57-7.55 (m, 1H), 7.12-7.01 (m, 2H); <sup>13</sup>C NMR (75 MHz, CDCl<sub>3</sub>): δ 160.3, 151.5, 147.9, 139.1, 138.6, 131.7, 129.1, 128.0, 120.0, 114.6; HR-MS (ESI-TOF) m/z: calcd for C<sub>10</sub>H<sub>9</sub>N<sub>2</sub>OS [M+H]<sup>+</sup> 205.0430, found 205.0432.

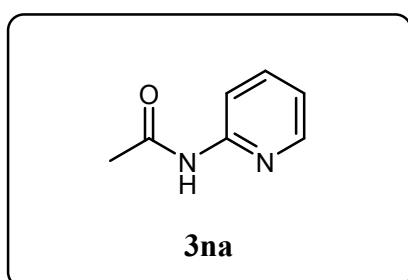

***N*-(Pyridin-2-yl)acetamide (3na)**. White solid; m.p. 56-59 °C; 35.5 mg, yield: 87%; <sup>1</sup>H NMR (300 MHz, CDCl<sub>3</sub>): δ 9.31 (s, 1H), 8.27-8.20 (m, 2H), 7.74-7.67 (m, 1H), 7.06-7.00 (m, 1H), 2.19 (s, 3H); <sup>13</sup>C NMR (75 MHz, CDCl<sub>3</sub>): δ 169.1, 151.9, 147.6, 138.7, 119.8, 114.6, 24.7; HR-MS (ESI-TOF) m/z: calcd for C<sub>7</sub>H<sub>9</sub>N<sub>2</sub>O [M+H]<sup>+</sup> 137.0709, found 137.0711.

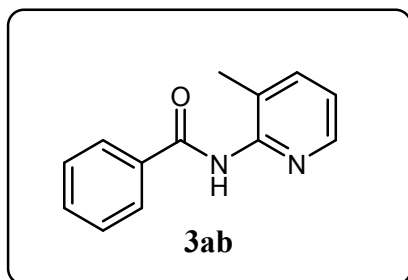

***N*-(3-Methylpyridin-2-yl)benzamide (3ab)**. Yellow semisolid; 35.7 mg, yield: 56%; <sup>1</sup>H NMR (300 MHz, CDCl<sub>3</sub>): δ 8.98 (s, 1H), 8.21 (d, *J* = 4.4 Hz, 1H), 7.95-7.93 (m, 2H), 7.61 (d, *J* = 7.5 Hz, 1H), 7.56-7.51 (m, 1H), 7.47-7.42 (m, 2H), 7.15-7.10 (m, 1H), 2.32 (s, 3H); <sup>13</sup>C NMR (75 MHz, CDCl<sub>3</sub>): δ 166.4, 150.1, 145.4, 140.1, 134.1, 132.0, 129.7, 128.6, 127.8, 121.9, 18.4; HR-MS (ESI-TOF) m/z: calcd for C<sub>13</sub>H<sub>13</sub>N<sub>2</sub>O [M+H]<sup>+</sup> 213.1022, found 213.1022.

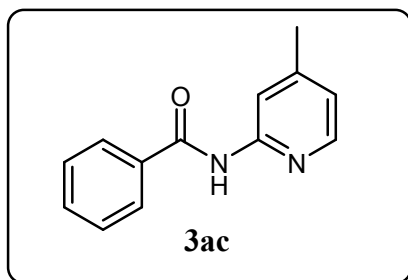

***N*-(4-Methylpyridin-2-yl)benzamide (3ac).** White semisolid; 42.0 mg, yield: 66%; <sup>1</sup>H NMR (300 MHz, CDCl<sub>3</sub>): δ 8.96 (s, 1H), 8.25 (s, 1H), 8.03 (d, *J* = 5.3 Hz, 1H), 7.94-7.90 (m, 2H), 7.59-7.44 (m, 3H), 6.87 (d, *J* = 5.0 Hz, 1H), 2.39 (s, 1H); <sup>13</sup>C NMR (75 MHz, CDCl<sub>3</sub>): δ 166.0, 151.8, 150.1, 147.6, 134.6, 132.3, 128.9, 127.4, 121.2, 114.9, 21.6; HR-MS (ESI-TOF) *m/z*: calcd for C<sub>13</sub>H<sub>13</sub>N<sub>2</sub>O [M+H]<sup>+</sup> 213.1022, found 213.1026.

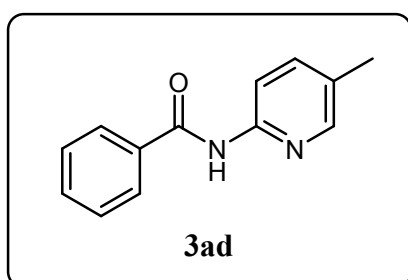

***N*-(5-Methylpyridin-2-yl)benzamide (3ad).** White solid; m.p. 121-123 °C; 55.4 mg, yield: 87%; <sup>1</sup>H NMR (300 MHz, CDCl<sub>3</sub>): δ 8.84 (s, 1H), 8.30-8.25 (m, 1H), 8.02 (s, 1H), 7.93-7.87 (m, 2H), 7.58-7.45 (m, 4H), 2.28 (s, 3H); <sup>13</sup>C NMR (75 MHz, CDCl<sub>3</sub>): δ 165.8, 149.6, 147.9, 139.2, 134.6, 132.2, 129.4, 128.9, 127.3, 113.8, 17.9; HR-MS (ESI-TOF) *m/z*: calcd for C<sub>13</sub>H<sub>13</sub>N<sub>2</sub>O [M+H]<sup>+</sup> 213.1022, found 213.1019.

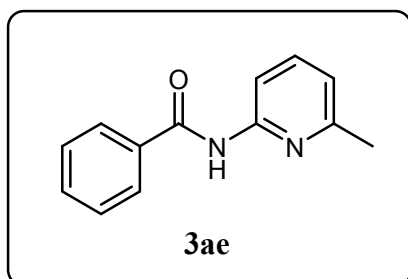

***N*-(6-Methylpyridin-2-yl)benzamide (3ae).** White solid; m.p. 108-110 °C; 17.2 mg, yield 27%; <sup>1</sup>H NMR (300 MHz, CDCl<sub>3</sub>): δ 8.66 (s, 1H), 8.19 (d, *J* = 8.2 Hz, 1H), 7.93-7.90 (m, 2H), 7.64 (t, *J* = 8.0 Hz, 1H), 7.58-7.52 (m, 1H), 7.50-7.44 (m, 2H), 6.92 (d, *J* = 7.5 Hz, 1H), 2.44 (s, 3H); <sup>13</sup>C NMR (75 MHz, CDCl<sub>3</sub>): δ 165.8, 157.0, 151.0, 138.9, 134.5, 132.3, 128.9, 127.3, 119.6, 111.1, 24.1; HR-MS (ESI-TOF) *m/z*: calcd for C<sub>13</sub>H<sub>13</sub>N<sub>2</sub>O [M+H]<sup>+</sup> 213.1022, found 213.1024.



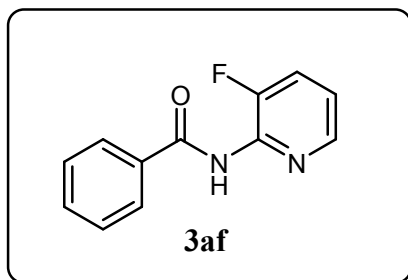

***N*-(3-Fluoropyridin-2-yl)benzamide (3af).** White solid; m.p. 91-94 °C; 51.2 mg, yield: 79%; <sup>1</sup>H NMR (300 MHz, CDCl<sub>3</sub>): δ 8.55 (s, 1H), 8.24-8.22 (m, 1H), 7.97-7.93 (m, 2H), 7.60-7.45 (m, 4H), 7.22-7.16 (m, 1H); <sup>13</sup>C NMR (75 MHz, CDCl<sub>3</sub>): δ 165.5, 151.8 (d, *J* = 261.2 Hz), 143.8 (d, *J* = 5.6 Hz), 140.4 (d, *J* = 12.2 Hz), 133.7, 132.5, 128.9, 127.8, 124.8 (d, *J* = 17.9 Hz), 122.2 (d, *J* = 3.4 Hz); HR-MS (ESI-TOF) *m/z*: calcd for C<sub>12</sub>H<sub>10</sub>FN<sub>2</sub>O [M+H]<sup>+</sup> 217.0772, found 217.0774.

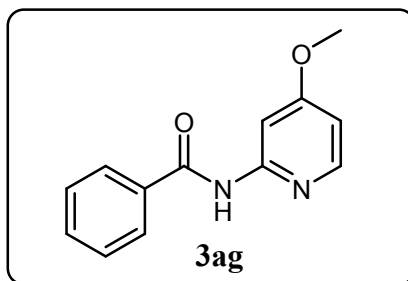

***N*-(4-Methoxypyridin-2-yl)benzamide (3ag).** White semisolid; 51.4 mg, yield: 75%; <sup>1</sup>H NMR (300 MHz, CDCl<sub>3</sub>): δ 9.89 (s, 1H), 8.08-8.06 (m, 1H), 7.93-7.89 (m, 2H), 7.74-7.69 (m, 1H), 7.55-7.39 (m, 3H), 6.52-6.48 (m, 1H), 3.86 (s, 3H); <sup>13</sup>C NMR (75 MHz, CDCl<sub>3</sub>): δ 167.5, 166.6, 153.7, 148.3, 134.6, 132.1, 128.7, 127.5, 107.7, 99.1, 55.4; HR-MS (ESI-TOF) *m/z*: calcd for C<sub>13</sub>H<sub>13</sub>N<sub>2</sub>O<sub>2</sub> [M+H]<sup>+</sup> 229.0972, found 229.0978.

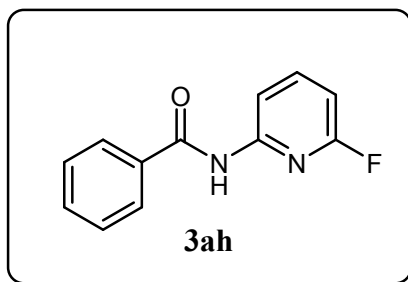

***N*-(6-Fluoropyridin-2-yl)benzamide (3ah).** White semisolid; 16.2 mg, yield: 25%; <sup>1</sup>H NMR (300 MHz, CDCl<sub>3</sub>): δ 8.67 (s, 1H), 8.24 (d, *J* = 7.7 Hz, 1H), 7.88-7.75 (m, 3H), 7.55-7.41 (m, 3H), 6.66-6.63 (m, 1H); <sup>13</sup>C NMR (75 MHz, CDCl<sub>3</sub>): δ 165.8, 161.9 (d, *J* = 240.6 Hz), 149.9 (d, *J* = 14.2 Hz), 143.4 (d, *J* = 7.8 Hz), 133.8, 132.4, 128.8, 127.3, 110.7 (d, *J* = 4.2 Hz), 104.5 (d, *J* = 35.0 Hz); HR-MS (ESI-TOF) *m/z*: calcd for C<sub>12</sub>H<sub>10</sub>FN<sub>2</sub>O [M+H]<sup>+</sup> 217.0772, found 217.0776.

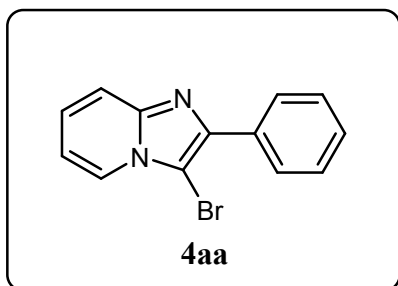

**3-Bromo-2-phenylimidazo[1,2-a]pyridine (4aa).** White solid; m.p. 82-84 °C; 75.4 mg, yield: 92%; <sup>1</sup>H NMR (300MHz, CDCl<sub>3</sub>): δ 8.18-8.12 (m, 3H), 7.64 (d, *J* = 9.1 Hz, 1H), 7.52-7.46 (m, 2H), 7.42-7.37 (m, 1H), 7.28-7.23 (m, 1H), 6.92 (t, *J* = 6.8 Hz, 1H); <sup>13</sup>C NMR (75 MHz, CDCl<sub>3</sub>): δ 145.6, 142.8, 133.0, 128.6, 128.4, 128.0, 125.2, 124.1, 117.7, 113.2, 91.8; HR-MS (ESI-TOF) m/z: calcd for C<sub>13</sub>H<sub>10</sub>BrN<sub>2</sub> [M+H]<sup>+</sup> 273.0022, found 273.0019.

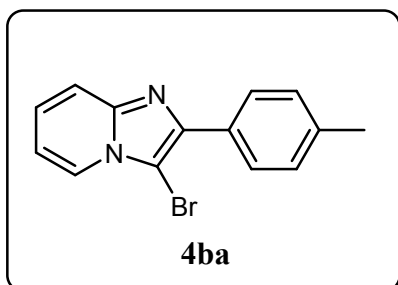

**3-Bromo-2-(p-tolyl)imidazo[1,2-a]pyridine (4ba).** White solid; m.p. 119-120 °C; 77.5 mg, yield: 90%; <sup>1</sup>H NMR (300 MHz, CDCl<sub>3</sub>): δ 8.15 (d, *J* = 6.7 Hz, 1H), 8.03 (d, *J* = 7.9 Hz, 2H), 7.62 (d, *J* = 9.2 Hz, 1H), 7.29 (d, *J* = 7.9 Hz, 2H), 7.23 (t, *J* = 7.6, 1H), 6.90 (t, *J* = 6.9 Hz, 1H), 2.41 (s, 3H); <sup>13</sup>C NMR (75 MHz, CDCl<sub>3</sub>): δ 145.5, 142.8, 138.3, 130.1, 129.3, 127.8, 125.1, 124.0, 117.6, 113.0, 91.5, 21.5; HR-MS (ESI-TOF) m/z: calcd for C<sub>14</sub>H<sub>12</sub>BrN<sub>2</sub> [M+H]<sup>+</sup> 287.0178, found 287.0176.

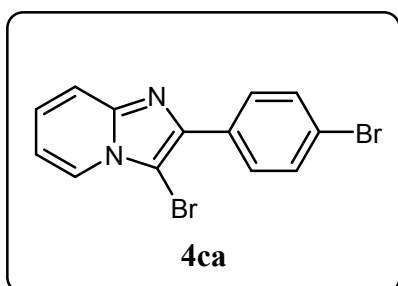

**3-Bromo-2-(4-bromophenyl)imidazo[1,2-a]pyridine (4ca).** White solid; m.p. 154-155 °C; 86.6 mg, yield: 82%; <sup>1</sup>H NMR (300 MHz, CDCl<sub>3</sub>): δ 8.16-8.13 (m, 1H), 8.04-8.00 (m, 2H), 7.64-7.58 (m, 3H), 7.29-7.23 (m, 1H), 6.96-6.90 (m, 1H); <sup>13</sup>C NMR (75 MHz, CDCl<sub>3</sub>): δ 145.6, 141.6, 131.9, 131.7, 129.4, 125.5, 124.1, 122.6, 117.7, 113.3, 91.9; HR-MS (ESI-TOF) m/z: calcd for C<sub>13</sub>H<sub>9</sub>Br<sub>2</sub>N<sub>2</sub> [M+H]<sup>+</sup> 350.9127, found 350.9133.

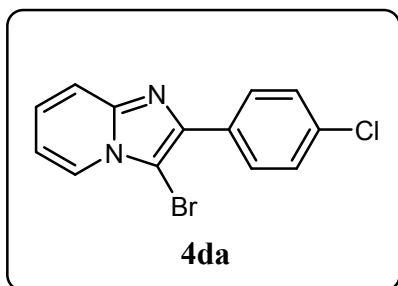

**3-Bromo-2-(4-chlorophenyl)imidazo[1,2-a]pyridine (4da).** White solid; m.p. 141-143 °C; 79.4 mg, yield: 86%; <sup>1</sup>H NMR (300 MHz, CDCl<sub>3</sub>): δ 8.18-8.14 (m, 1H), 8.10-8.05 (m, 2H), 7.62 (dd, *J*<sub>1</sub> = 9.0 Hz, *J*<sub>2</sub> = 1.1 Hz, 1H), 7.47-7.42 (m, 2H), 7.30-7.24 (m, 1H), 6.94 (tt, *J*<sub>1</sub> = 7.1 Hz, *J*<sub>2</sub> = 1.5 Hz, 1H); <sup>13</sup>C NMR (75 MHz, CDCl<sub>3</sub>): δ 145.6, 141.7, 134.3, 131.5, 129.2, 128.8, 125.5, 124.1, 117.8, 113.4, 91.9; HR-MS (ESI-TOF) *m/z*: calcd for C<sub>13</sub>H<sub>9</sub>BrClN<sub>2</sub> [M+H]<sup>+</sup> 306.9632, found 306.9628.

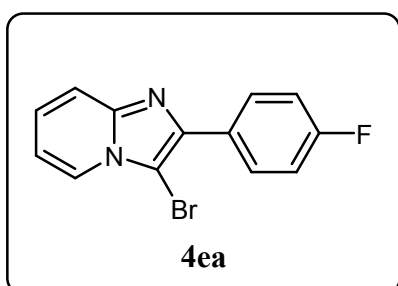

**3-Bromo-2-(4-fluorophenyl)imidazo[1,2-a]pyridine (4ea).** White solid; m.p. 117-118 °C; 69.9 mg, yield: 80%; <sup>1</sup>H NMR (300 MHz, CDCl<sub>3</sub>): δ 8.17-8.07 (m, 3H), 7.64-7.59 (m, 1H), 7.29-7.22 (m, 1H), 7.21-7.12 (m, 2H), 6.96-6.89 (m, 1H); <sup>13</sup>C NMR (75 MHz, CDCl<sub>3</sub>): δ 162.9 (d, *J* = 247.9 Hz), 145.5, 141.9, 129.8 (d, *J* = 8.0 Hz), 129.1 (d, *J* = 3.3 Hz), 125.3, 124.1, 117.7, 115.6 (d, *J* = 21.5 Hz), 113.2, 91.5; HR-MS (ESI-TOF) *m/z*: calcd for C<sub>13</sub>H<sub>9</sub>BrFN<sub>2</sub> [M+H]<sup>+</sup> 290.9928, found 290.9935.

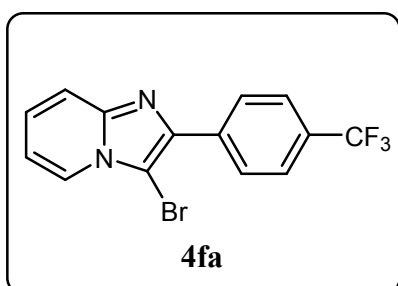

**3-Bromo-2-(4-(trifluoromethyl)phenyl)imidazo[1,2-a]pyridine (4fa).** White solid; m.p. 125-128 °C; 87.0 mg, yield: 85%; <sup>1</sup>H NMR (300 MHz, CDCl<sub>3</sub>): δ 8.27 (d, *J* = 8.1 Hz, 2H), 8.21-8.16 (m, 1H), 7.73 (d, *J* = 8.0 Hz, 2H), 7.67-7.63 (m, 1H), 7.31-7.27 (m, 1H), 7.00-6.93 (m, 1H); <sup>13</sup>C NMR (75 MHz, CDCl<sub>3</sub>): δ 145.7, 141.2, 136.5, 130.1 (q, *J* = 32.3 Hz), 128.1, 125.8, 125.5 (q, *J* = 3.9 Hz), 124.3 (q, *J* = 270.8 Hz), 124.2, 117.9, 113.6, 92.6; HR-MS (ESI-TOF) *m/z*: calcd for C<sub>14</sub>H<sub>9</sub>BrF<sub>3</sub>N<sub>2</sub> [M+H]<sup>+</sup> 340.9896, found 340.9897.

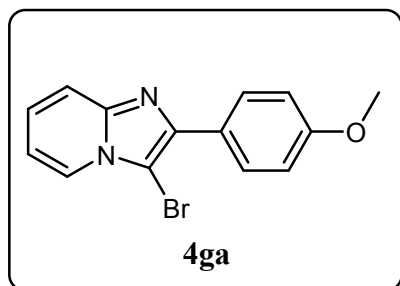

**3-Bromo-2-(4-methoxyphenyl)imidazo[1,2-a]pyridine (4ga).** White solide; m.p. 105-106 °C; 75.5 mg, yield: 83%; <sup>1</sup>H NMR (300 MHz, CDCl<sub>3</sub>): δ 8.15-8.12 (m, 1H), 8.10-8.05 (m, 2H), 7.61 (d, *J* = 9.7 Hz, 1H), 7.26-7.20 (m, 1H), 7.04-6.99 (m, 2H), 6.92-6.87 (m, 1H), 3.86 (s, 1H); <sup>13</sup>C NMR (75 MHz, CDCl<sub>3</sub>): δ 159.8, 145.4, 142.6, 129.3, 125.5, 125.0, 124.0, 117.5, 114.0, 113.0, 91.0, 55.4; HR-MS (ESI-TOF) *m/z*: calcd for C<sub>14</sub>H<sub>12</sub>BrN<sub>2</sub>O (M+H)<sup>+</sup> 303.0128, found 303.0128.

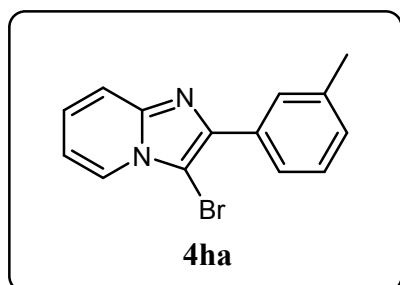

**3-Bromo-2-(m-tolyl)imidazo[1,2-a]pyridine (4ha).** Yellow solid; m.p. 77-79 °C; 77.5 mg, yield: 90%; <sup>1</sup>H NMR (300 MHz, CDCl<sub>3</sub>): δ 8.17 (d, *J* = 6.9 Hz, 1H), 7.95-7.92 (m, 2H), 7.64 (d, *J* = 9.1 Hz, 1H), 7.37 (t, *J* = 7.6 Hz, 1H), 7.28-7.20 (m, 2H), 6.92 (t, *J* = 6.8 Hz, 1H), 2.45 (s, 3H); <sup>13</sup>C NMR (75 MHz, CDCl<sub>3</sub>): δ 145.5, 142.9, 138.3, 132.8, 129.2, 128.7, 128.4, 125.2, 125.0, 124.1, 117.7, 113.1, 91.8, 21.6; HR-MS (ESI-TOF) *m/z*: calcd for C<sub>14</sub>H<sub>12</sub>BrN<sub>2</sub> [M + H]<sup>+</sup> 287.0178, found 287.0182.

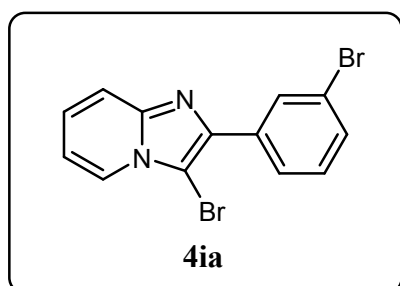

**3-Bromo-2-(3-bromophenyl)imidazo[1,2-a]pyridine (4ia).** White solid; m.p. 132-135 °C; 89.8 mg, yield: 85%; <sup>1</sup>H NMR (300 MHz, CDCl<sub>3</sub>): δ 8.31-8.29 (m, 1H), 8.15-8.12 (m, 1H), 8.09-8.05 (m, 1H), 7.61 (d, *J* = 9.5 Hz, 1H), 7.51-7.48 (m, 1H), 7.33 (t, *J* = 7.8 Hz, 1H), 7.28-7.22 (m, 1H), 6.92 (t, *J* = 6.7 Hz, 1H); <sup>13</sup>C NMR (75 MHz, CDCl<sub>3</sub>): δ 145.5, 141.1, 135.0, 131.3, 130.7, 130.0, 126.3, 125.5, 124.1, 122.8, 117.8, 113.4, 92.2; HR-MS (ESI-TOF) *m/z*: calcd for C<sub>13</sub>H<sub>9</sub>Br<sub>2</sub>N<sub>2</sub> [M+H]<sup>+</sup> 350.9127, found 350.9129.

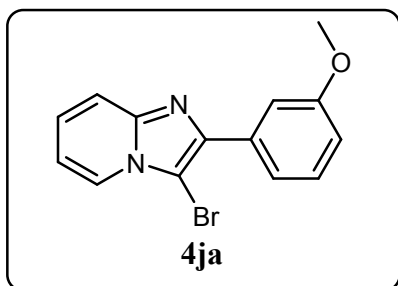

**3-Bromo-2-(3-methoxyphenyl)imidazo[1,2-a]pyridine (4ja).** Yellow liquid; 69.1 mg, yield: 76%;  $^1\text{H}$  NMR (300 MHz,  $\text{CDCl}_3$ ):  $\delta$  8.16 (d,  $J = 6.7$  Hz, 1H), 7.75-7.70 (m, 2H), 7.64 (d,  $J = 9.0$  Hz, 1H), 7.39 (t,  $J = 8.0$  Hz, 1H), 7.27-7.22 (m, 1H), 6.96-6.89 (m, 2H), 3.90 (s, 3H);  $^{13}\text{C}$  NMR (75 MHz,  $\text{CDCl}_3$ ):  $\delta$  159.8, 145.4, 142.5, 134.3, 129.6, 125.2, 124.0, 120.4, 117.7, 114.6, 113.2, 113.0, 92.0, 55.5; HR-MS (ESI-TOF)  $m/z$ : calcd for  $\text{C}_{14}\text{H}_{12}\text{BrN}_2\text{O}$   $[\text{M}+\text{H}]^+$  303.0128, found 303.0125.

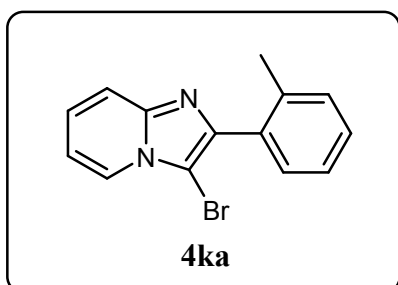

**3-Bromo-2-(o-tolyl)imidazo[1,2-a]pyridine (4ka).** Yellow solid; m.p. 80-82  $^\circ\text{C}$ ; 75.0 mg, yield: 87%;  $^1\text{H}$  NMR (300 MHz,  $\text{CDCl}_3$ ):  $\delta$  8.17 (dt,  $J_1 = 6.9$  Hz,  $J_2 = 1.2$  Hz, 1H), 7.64 (dt,  $J_1 = 9.1$  Hz,  $J_2 = 1.1$  Hz, 1H), 7.47-7.44 (m, 1H), 7.37-7.24 (m, 4H), 6.95 (td,  $J_1 = 6.8$  Hz,  $J_2 = 1.2$  Hz, 1H), 2.38 (s, 3H);  $^{13}\text{C}$  NMR (75 MHz,  $\text{CDCl}_3$ ):  $\delta$  145.3, 144.8, 137.6, 132.4, 130.8, 130.5, 128.7, 125.5, 124.9, 124.1, 117.8, 113.1, 93.8, 20.3; HR-MS (ESI-TOF)  $m/z$ : calcd for  $\text{C}_{14}\text{H}_{12}\text{BrN}_2$   $[\text{M}+\text{H}]^+$  287.0178, found 287.0176.

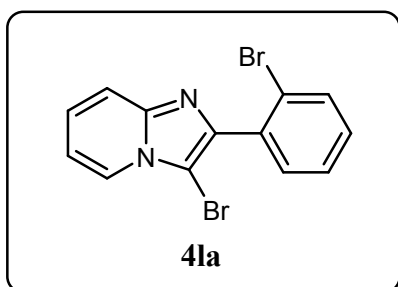

**3-Bromo-2-(2-bromophenyl)imidazo[1,2-a]pyridine (4la).** White solid; m.p. 150-151  $^\circ\text{C}$ ; 86.6 mg, yield: 82%;  $^1\text{H}$  NMR (300 MHz,  $\text{CDCl}_3$ ):  $\delta$  8.18-8.14 (m, 1H), 7.72-7.69 (m, 1H), 7.68-7.64 (m, 1H), 7.53-7.49 (m, 1H), 7.40 (tt,  $J_1 = 7.5$  Hz,  $J_2 = 1.2$  Hz, 1H), 7.32-7.24 (m, 2H), 6.99-6.93 (m, 1H);  $^{13}\text{C}$  NMR (75 MHz,  $\text{CDCl}_3$ ):  $\delta$  145.2, 143.9, 134.2, 133.1, 132.5, 130.2, 127.2, 125.1, 124.1, 123.8, 118.0, 113.3, 94.4; HR-MS (ESI-TOF)  $m/z$ : calcd for  $\text{C}_{13}\text{H}_9\text{Br}_2\text{N}_2$   $[\text{M}+\text{H}]^+$  350.9127, found 350.9130.

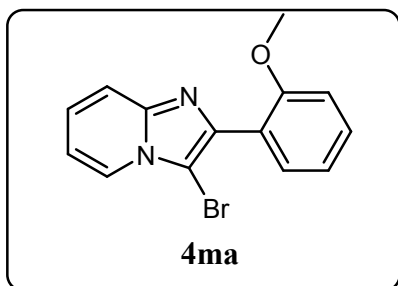

**3-Bromo-2-(2-methoxyphenyl)imidazo[1,2-a]pyridine (4ma).** White solid; m.p. 113-115 °C; 77.3 mg, yield: 85%; <sup>1</sup>H NMR (300 MHz, CDCl<sub>3</sub>): δ 8.13 (d, *J* = 6.8 Hz, 1H), 7.63 (d, *J* = 9.0 Hz, 1H), 7.57 (dd, *J*<sub>1</sub> = 7.5 Hz, *J*<sub>2</sub> = 1.8 Hz, 1H), 7.40 (t, *J* = 7.9 Hz, 1H), 7.20 (t, *J* = 7.5 Hz, 1H), 7.10-6.98 (m, 2H), 6.88 (t, *J* = 6.9 Hz, 1H), 3.86 (s, 3H); <sup>13</sup>C NMR (75 MHz, CDCl<sub>3</sub>): δ 157.2, 145.3, 141.9, 132.0, 130.1, 124.6, 123.9, 122.0, 120.5, 117.7, 112.9, 111.1, 94.8, 55.5; HR-MS (ESI-TOF) *m/z*: calcd for C<sub>14</sub>H<sub>12</sub>BrN<sub>2</sub>O [M+H]<sup>+</sup> 303.0128, found 303.0121.

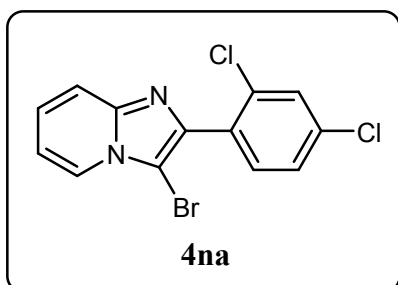

**3-Bromo-2-(2,4-dichlorophenyl)imidazo[1,2-a]pyridine (4na).** White solid; m.p. 151-153 °C; 98.5 mg, yield: 96%; <sup>1</sup>H NMR (300 MHz, CDCl<sub>3</sub>): δ 8.18-8.14 (m, 1H), 7.65 (d, *J* = 9.2 Hz, 1H), 7.54-7.48 (m, 2H), 7.37-7.26 (m, 2H), 6.99-6.95 (m, 1H); <sup>13</sup>C NMR (75 MHz, CDCl<sub>3</sub>): δ 145.4, 141.4, 135.3, 134.7, 133.2, 130.8, 129.8, 127.1, 125.3, 124.1, 118.0, 113.5, 94.8; HR-MS (ESI-TOF) *m/z*: calcd for C<sub>13</sub>H<sub>8</sub>BrCl<sub>2</sub>N<sub>2</sub> [M+H]<sup>+</sup> 340.9242, found 340.9241.

**3-Bromo-2-(2,4-dichloro-5-fluorophenyl)imidazo[1,2-a]pyridine (4oa).** White solid; m.p. 192-193 °C; 83.2 mg, yield: 77%; <sup>1</sup>H NMR (300 MHz, CDCl<sub>3</sub>): δ 8.18 (d, *J* = 6.9 Hz, 1H), 7.66 (d, *J* = 9.1 Hz, 1H), 7.58 (d, *J* = 6.7 Hz, 1H), 7.39 (d, *J* = 9.1 Hz, 1H), 7.35-7.27 (m, 1H), 7.01 (t, *J* = 6.8 Hz, 1H); <sup>13</sup>C NMR (75 MHz, CDCl<sub>3</sub>): δ 156.6 (d, *J* = 249.8 Hz), 145.5, 140.6, 132.5 (d, *J* = 7.3 Hz), 131.5, 129.4 (d, *J* = 3.8 Hz), 125.6, 124.2, 122.4 (d, *J* = 18.9 Hz), 120.0 (d, *J* = 23.0 Hz), 118.2, 113.7, 94.9; HR-MS (ESI-TOF) *m/z*: calcd for C<sub>13</sub>H<sub>7</sub>BrCl<sub>2</sub>FN<sub>2</sub> [M + H]<sup>+</sup> 358.9148, found 358.9156.

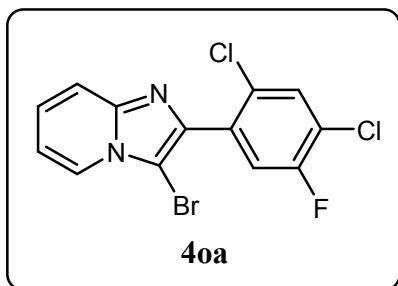

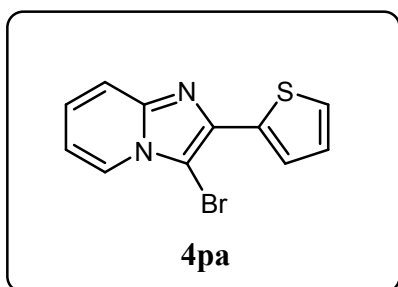

**3-Bromo-2-(thiophen-2-yl)imidazo[1,2-a]pyridine (4pa).** Yellow solid; m.p. 108-111 °C; 81.2 mg, yield: 97%; <sup>1</sup>H NMR (300 MHz, CDCl<sub>3</sub>): δ 8.09 (d, *J* = 6.9 Hz, 1H), 7.86 (d, *J* = 3.6 Hz, 1H), 7.60 (d, *J* = 9.1 Hz, 1H), 7.40-7.38 (m, 1H), 7.26-7.20 (m, 1H), 7.16-7.13 (m, 1H), 6.90 (t, *J* = 6.8 Hz, 1H); <sup>13</sup>C NMR (75 MHz, CDCl<sub>3</sub>): δ 145.36, 138.49, 136.02, 127.78, 126.20, 125.49, 125.39, 123.80, 117.38, 113.19, 90.82; HR-MS (ESI-TOF) *m/z*: calcd for C<sub>11</sub>H<sub>8</sub>BrN<sub>2</sub>S [M+H]<sup>+</sup> 278.9586, found 278.9587.

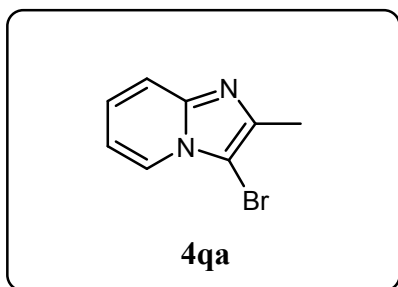

**3-Bromo-2-methylimidazo[1,2-a]pyridine (4qa).** Yellow solid; m.p. 61-64 °C; 57.0 mg, yield: 90%; <sup>1</sup>H NMR (300 MHz, CDCl<sub>3</sub>): δ 7.95 (d, *J* = 6.6 Hz, 1H), 7.44 (d, *J* = 9.1 Hz, 1H), 7.15-7.08 (m, 1H), 6.80 (t, *J* = 5.4 Hz, 1H), 2.39 (s, 3H); <sup>13</sup>C NMR (75 MHz, CDCl<sub>3</sub>): δ 145.2, 142.0, 124.5, 123.7, 117.0, 112.7, 93.0, 13.7; HR-MS (ESI-TOF) *m/z*: calcd for C<sub>8</sub>H<sub>8</sub>BrN<sub>2</sub> [M+H]<sup>+</sup> 210.9865, found 210.9863.

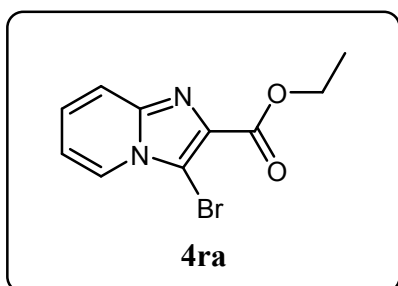

**Ethyl 3-bromoimidazo[1,2-a]pyridine-2-carboxylate (4ra).** Yellow solid; m.p. 55-58 °C; 37.9 mg, yield: 47%; <sup>1</sup>H NMR (300 MHz, CDCl<sub>3</sub>): δ 8.20 (dt, *J*<sub>1</sub> = 7.0, *J*<sub>2</sub> = 1.2 Hz, 1H), 7.68 (dt, *J*<sub>1</sub> = 9.2, *J*<sub>2</sub> = 1.1 Hz, 1H), 7.35-7.29 (m, 1H), 7.03-6.98 (m, 1H), 4.49 (q, *J* = 7.1 Hz, 2H), 1.46 (t, *J* = 7.1 Hz, 3H); <sup>13</sup>C NMR (75 MHz, CDCl<sub>3</sub>): δ 162.4, 145.2, 133.8, 126.7, 124.5, 119.2, 114.6, 100.4, 61.5, 14.5; HR-MS (ESI-TOF) *m/z*: calcd for C<sub>10</sub>H<sub>10</sub>BrN<sub>2</sub>O<sub>2</sub> [M+H]<sup>+</sup> 268.9920, found 268.9924.

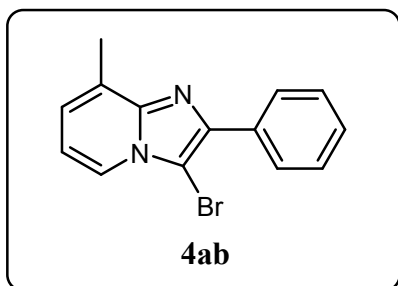

**3-Bromo-8-methyl-2-phenylimidazo[1,2-a]pyridine (4ab).** Yellow solid; m.p. 101-103 °C; 59.4 mg, yield: 69%; <sup>1</sup>H NMR (300 MHz, CDCl<sub>3</sub>): δ 8.15-8.12 (m, 2H), 8.01 (d, *J* = 6.8 Hz, 1H), 7.52-7.46 (m, 2H), 7.41-7.36 (m, 1H), 7.02 (dt, *J*<sub>1</sub> = 6.9Hz, *J*<sub>2</sub> = 1.2 Hz, 1H), 6.80 (t, *J* = 6.9 Hz, 1H), 2.67 (s, 3H); <sup>13</sup>C NMR (75 MHz, CDCl<sub>3</sub>): δ 145.8, 142.2, 133.2, 128.5, 128.2, 128.1, 127.7, 123.9, 121.9, 113.1, 92.1, 16.7; HR-MS (ESI-TOF) *m/z*: calcd for C<sub>14</sub>H<sub>12</sub>BrN<sub>2</sub> [M+H]<sup>+</sup> 287.0178, found 287.0180.

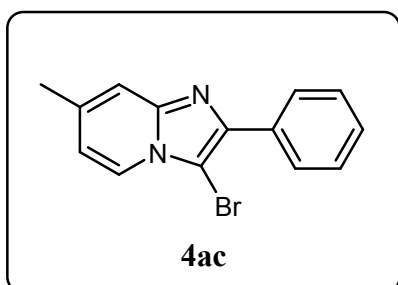

**3-Bromo-7-methyl-2-phenylimidazo[1,2-a]pyridine (4ac).** White solid; m.p. 113-115 °C; 66.3 mg, yield: 77%; <sup>1</sup>H NMR (300 MHz, CDCl<sub>3</sub>): δ 8.13-8.10 (m, 2H), 8.04 (d, *J* = 7.0 Hz, 1H), 7.50-7.45 (m, 2H), 7.40-7.35 (m, 2H), 6.77-6.74 (m, 1H), 2.43 (s, 3H); <sup>13</sup>C NMR (75 MHz, CDCl<sub>3</sub>): δ 145.9, 142.4, 136.4, 133.1, 128.6, 128.3, 127.9, 123.3, 116.1, 115.8, 91.0, 21.5; HR-MS (ESI-TOF) *m/z*: calcd for C<sub>14</sub>H<sub>12</sub>BrN<sub>2</sub> [M+H]<sup>+</sup> 287.0178, found 287.0180.

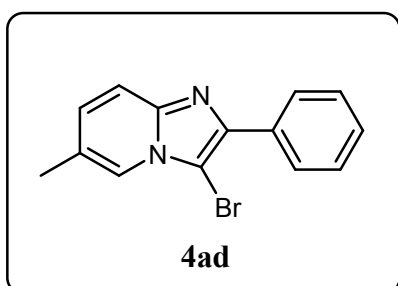

**3-Bromo-6-methyl-2-phenylimidazo[1,2-a]pyridine (4ad).** White solid; m.p. 136-137 °C; 65.5 mg, yield: 76%; <sup>1</sup>H NMR (300 MHz, CDCl<sub>3</sub>): δ 8.14-8.10 (m, 2H), 7.92 (s, 1H), 7.54-7.45 (m, 3H), 7.40-7.34 (m, 1H), 7.08 (dd, *J*<sub>1</sub> = 9.1Hz, *J*<sub>2</sub> = 1.6 Hz, 1H), 2.36 (s, 3H); <sup>13</sup>C NMR (75 MHz, CDCl<sub>3</sub>): δ 144.6, 142.4, 133.1, 128.5, 128.3, 128.2, 127.9, 122.9, 121.7, 117.0, 91.3, 18.5; HR-MS (ESI-TOF) *m/z*: calcd for C<sub>14</sub>H<sub>12</sub>BrN<sub>2</sub> [M+H]<sup>+</sup> 287.0178, found 287.0179.



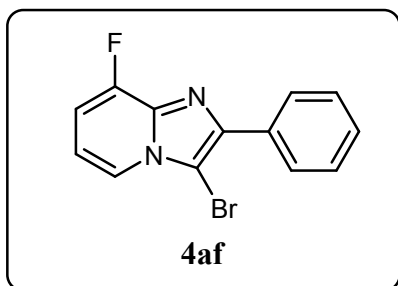

**3-Bromo-8-fluoro-2-phenylimidazo[1,2-a]pyridine (4af).** White solid; m.p. 105-106 °C; 50.7 mg, yield: 58%; <sup>1</sup>H NMR (300 MHz, CDCl<sub>3</sub>): δ 8.17-8.14 (m, 2H), 8.02-7.98 (m, 1H), 7.51-7.46 (m, 2H), 7.43-7.37 (m, 1H), 7.01-6.94 (m, 1H), 6.88-6.81 (m, 1H); <sup>13</sup>C NMR (75 MHz, CDCl<sub>3</sub>): δ 153.0, 149.7, 143.3, 132.4, 128.7, 128.6, 128.1, 120.5 (d, *J* = 5.0 Hz), 112.1 (d, *J* = 7.0 Hz), 107.9 (d, *J* = 16.5 Hz), 93.4; HR-MS (ESI-TOF) *m/z*: calcd for C<sub>13</sub>H<sub>9</sub>BrFN<sub>2</sub> [M+H]<sup>+</sup> 290.9928, found 290.9933.

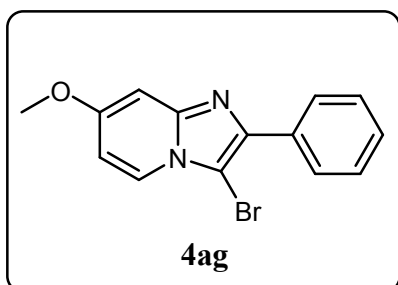

**3-Bromo-7-methoxy-2-phenylimidazo[1,2-a]pyridine (4ag).** Yellow solid; m.p. 126-129 °C; 53.7 mg, yield: 59%; <sup>1</sup>H NMR (300 MHz, CDCl<sub>3</sub>): δ 8.13-8.10 (m, 2H), 7.98 (d, *J* = 7.5 Hz, 1H), 7.50-7.45 (m, 2H), 7.40-7.34 (m, 1H), 6.92 (s, 1H), 6.66-6.62 (m, 1H), 3.88 (s, 3H); <sup>13</sup>C NMR (75 MHz, CDCl<sub>3</sub>): δ 158.4, 146.8, 142.1, 133.1, 128.5, 128.2, 127.7, 124.4, 108.2, 94.9, 90.0, 55.8; HR-MS (ESI-TOF) *m/z*: calcd for C<sub>14</sub>H<sub>12</sub>BrN<sub>2</sub>O [M+H]<sup>+</sup> 303.0128, found 303.0129.

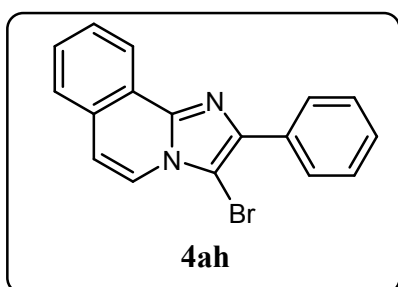

**3-Bromo-2-phenylimidazo[2,1-a]isoquinoline (4ah).** White solid; m.p. 159-161 °C; 92.1 mg, yield: 95%; <sup>1</sup>H NMR (300 MHz, CDCl<sub>3</sub>): δ 8.72 (d, *J* = 7.8 Hz, 1H), 8.21-8.17 (m, 2H), 7.94 (d, *J* = 7.4 Hz, 1H), 7.72-7.69 (m, 1H), 7.68-7.55 (m, 2H), 7.54-7.49 (m, 2H), 7.43-7.37 (m, 1H), 7.12 (d, *J* = 7.4 Hz, 1H); <sup>13</sup>C NMR (75 MHz, CDCl<sub>3</sub>): δ 143.4, 140.9, 133.2, 129.5, 128.7, 128.6, 128.5, 128.1, 127.8, 127.2, 123.5, 123.2, 121.1, 113.8, 93.7; HR-MS (ESI-TOF) *m/z*: calcd for C<sub>17</sub>H<sub>12</sub>BrN<sub>2</sub> [M+H]<sup>+</sup> 323.0178, found 323.0183.

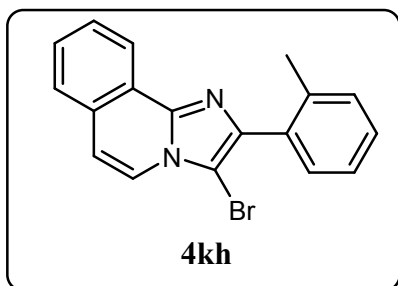

**3-Bromo-2-(o-tolyl)imidazo[2,1-a]isoquinoline (4kh).** White solid; m.p. 142-143 °C; 77.9 mg, yield: 77%; <sup>1</sup>H NMR (300 MHz, CDCl<sub>3</sub>): δ 8.68 (d, *J* = 7.6 Hz, 1H), 7.94 (d, *J* = 7.1 Hz, 1H), 7.71 (d, *J* = 7.7 Hz, 1H), 7.66-7.55 (m, 2H), 7.50 (d, *J* = 6.6 Hz, 1H), 7.34-7.24 (m, 3H), 7.14 (d, *J* = 7.3 Hz, 1H), 2.43 (s, 3H); <sup>13</sup>C NMR (75 MHz, CDCl<sub>3</sub>): δ 143.1, 142.7, 137.8, 132.5, 130.8, 130.6, 129.4, 128.7, 128.6, 128.5, 127.1, 125.6, 123.6, 123.0, 121.2, 113.7, 95.6, 20.4; HR-MS (ESI-TOF) *m/z*: calcd for C<sub>18</sub>H<sub>14</sub>BrN<sub>2</sub> [M+H]<sup>+</sup> 337.0335, found 337.0333.

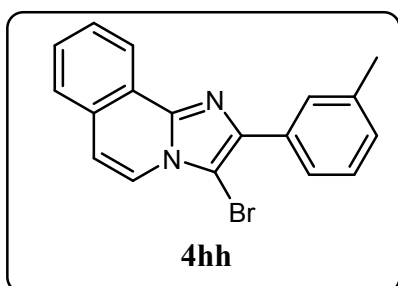

**3-Bromo-2-(m-tolyl)imidazo[2,1-a]isoquinoline (4hh).** Yellow solid; m.p. 139-142 °C; 74.9 mg, yield: 74%; <sup>1</sup>H NMR (300 MHz, CDCl<sub>3</sub>): δ 8.70 (d, *J* = 7.8 Hz, 1H), 8.00-7.95 (m, 2H), 7.90 (d, *J* = 7.3 Hz, 1H), 7.68-7.52 (m, 3H), 7.38 (t, *J* = 7.6 Hz, 1H), 7.23-7.18 (m, 1H), 7.07 (d, *J* = 7.4 Hz, 1H), 2.46 (s, 3H); <sup>13</sup>C NMR (75 MHz, CDCl<sub>3</sub>): δ 143.3, 141.0, 138.2, 133.1, 129.5, 128.9, 128.6, 128.5, 128.4, 127.1, 124.9, 123.5, 123.1, 121.0, 113.7, 93.7, 21.7; HR-MS (ESI-TOF) *m/z*: calcd for C<sub>18</sub>H<sub>14</sub>BrN<sub>2</sub> [M+H]<sup>+</sup> 337.0335, found 337.0330.

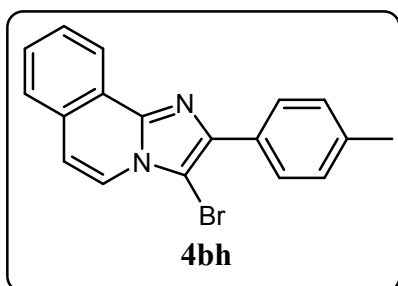

**3-Bromo-2-(p-tolyl)imidazo[2,1-a]isoquinoline (4bh).** Yellow solid; m.p. 122-124 °C; 75.9 mg, yield: 75%; <sup>1</sup>H NMR (300 MHz, CDCl<sub>3</sub>): δ 8.72 (d, *J* = 7.9 Hz, 1H), 8.08 (d, *J* = 8.2 Hz, 2H), 7.94 (d, *J* = 7.4 Hz, 1H), 7.72-7.55 (m, 3H), 7.32 (d, *J* = 7.9 Hz, 2H), 7.11 (d, *J* = 7.3 Hz, 1H), 2.43 (s, 3H); <sup>13</sup>C NMR (75 MHz, CDCl<sub>3</sub>): δ 143.3, 141.0, 137.9, 130.3, 129.5, 129.3, 128.6, 128.4, 127.7, 127.1, 123.5, 123.2, 121.1, 113.6, 93.4, 21.5; HR-MS (ESI-TOF) *m/z*: calcd for C<sub>18</sub>H<sub>14</sub>BrN<sub>2</sub> [M+H]<sup>+</sup> 337.0335, found 337.0331.

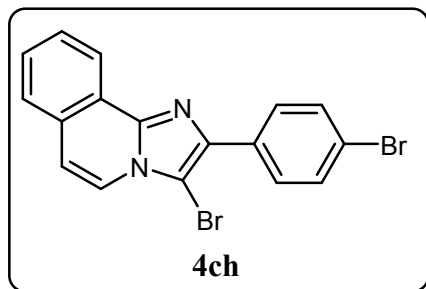

**3-Bromo-2-(4-bromophenyl)imidazo[2,1-a]isoquinoline (4ch).** Yellow solid; m.p. 167-168 °C; 82.0 mg, yield: 68%;  $^1\text{H}$  NMR (300 MHz,  $\text{CDCl}_3$ ):  $\delta$  8.68 (d,  $J = 7.8$  Hz, 1H), 8.09-8.05 (m, 2H), 7.93 (d,  $J = 7.4$  Hz, 1H), 7.73-7.63 (m, 2H), 7.62-7.56 (m, 3H), 7.13 (d,  $J = 7.3$  Hz, 1H);  $^{13}\text{C}$  NMR (75 MHz,  $\text{CDCl}_3$ ):  $\delta$  143.5, 139.8, 132.2, 131.7, 129.6, 129.3, 128.9, 128.6, 127.2, 123.5, 123.2, 122.2, 121.0, 114.0, 93.8; HR-MS (ESI-TOF)  $m/z$ : calcd for  $\text{C}_{17}\text{H}_{11}\text{Br}_2\text{N}_2$   $[\text{M} + \text{H}]^+$  400.9284, found 400.9278.

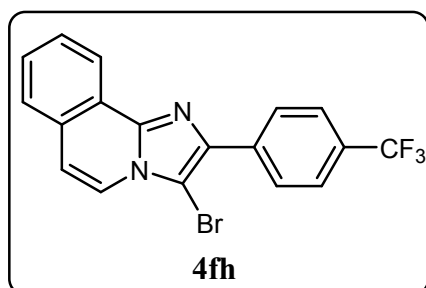

**3-Bromo-2-(4-(trifluoromethyl)phenyl)imidazo[2,1-a]isoquinoline (4fh).** Yellow solid; m.p. 158-159 °C; 97.4 mg, yield: 83%;  $^1\text{H}$  NMR (300 MHz,  $\text{CDCl}_3$ ):  $\delta$  8.69 (d,  $J = 7.8$  Hz, 1H), 8.32 (d,  $J = 8.1$  Hz, 2H), 7.94 (d,  $J = 7.4$  Hz, 1H), 7.75-7.70 (m, 3H), 7.69-7.58 (m, 2H), 7.15 (d,  $J = 7.4$  Hz, 1H);  $^{13}\text{C}$  NMR (75 MHz,  $\text{CDCl}_3$ ):  $\delta$  143.7, 139.3, 136.7, 129.8 (q,  $J = 32.3$  Hz), 129.6, 129.0, 128.7, 127.8, 127.3, 125.5 (q,  $J = 3.9$  Hz), 124.4 (q,  $J = 270.0$  Hz), 123.5, 123.2, 121.0, 114.2, 94.6; HR-MS (ESI-TOF)  $m/z$ : calcd for  $\text{C}_{18}\text{H}_{11}\text{BrF}_3\text{N}_2$   $[\text{M} + \text{H}]^+$  391.0052, found 391.0046.

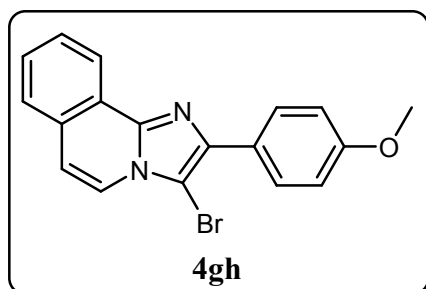

**3-Bromo-2-(4-methoxyphenyl)imidazo[2,1-a]isoquinoline (4gh).** Yellow solid; m.p. 144-146 °C; 101.7 mg, yield: 96%;  $^1\text{H}$  NMR (300 MHz,  $\text{CDCl}_3$ ):  $\delta$  8.70 (d,  $J = 7.9$  Hz, 1H), 8.12 (d,  $J = 8.4$  Hz, 2H), 7.92 (d,  $J = 7.3$  Hz, 1H), 7.70-7.54 (m, 3H), 7.11-7.02 (m, 3H), 3.87 (s, 3H);  $^{13}\text{C}$  NMR (75 MHz,  $\text{CDCl}_3$ ):  $\delta$  159.6, 143.3, 140.8, 129.5, 129.1, 128.5, 128.4, 127.1, 125.8, 123.5, 123.1, 121.0, 114.0, 113.5, 92.9, 55.4; HR-MS (ESI-TOF)  $m/z$ : calcd for  $\text{C}_{18}\text{H}_{14}\text{BrN}_2\text{O}$   $[\text{M} + \text{H}]^+$  353.0284, found 353.0279.

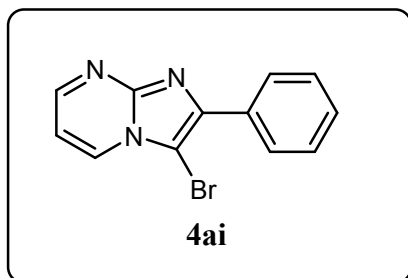

**3-Bromo-2-phenylimidazo[1,2-a]pyrimidine (4ai).** Yellow solid; m.p. 133-135 °C; 24.7 mg, yield: 30%; <sup>1</sup>H NMR (300 MHz, CDCl<sub>3</sub>): δ 8.58 (s, 1H), 8.45 (d, *J* = 6.9 Hz, 1H), 8.22 (d, *J* = 7.6 Hz, 2H), 7.52-7.38 (m, 3H), 7.01-6.98 (m, 1H); <sup>13</sup>C NMR (75 MHz, CDCl<sub>3</sub>): δ 150.3, 148.3, 144.4, 132.3, 131.6, 129.0, 128.6, 128.2, 109.5, 90.5; HR-MS (ESI-TOF) *m/z*: calcd for C<sub>12</sub>H<sub>9</sub>BrN<sub>3</sub> [M+H]<sup>+</sup> 273.9974, found 273.9972.

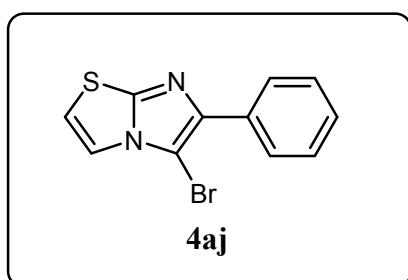

**5-Bromo-6-phenylimidazo[2,1-b]thiazole (4aj).** Yellow solid; m.p. 109-110 °C; 15.9 mg, yield: 19%; <sup>1</sup>H NMR (300 MHz, CDCl<sub>3</sub>): δ 8.03-8.00 (m, 2H), 7.48-7.41 (m, 3H), 7.37-7.31 (m, 1H), 6.91 (d, *J* = 4.4 Hz, 1H); <sup>13</sup>C NMR (75 MHz, CDCl<sub>3</sub>): δ 148.9, 144.1, 133.2, 128.6, 127.9, 127.0, 117.7, 113.1, 90.2; HR-MS (ESI-TOF) *m/z*: calcd for C<sub>11</sub>H<sub>8</sub>BrN<sub>2</sub>S [M+H]<sup>+</sup> 278.9586, found 278.9591.

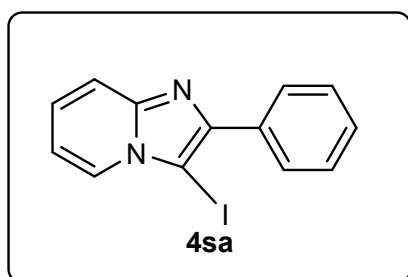

**3-Iodo-2-phenylimidazo[1,2-a]pyridine (4sa).** White solid; m.p. 164-167 °C; 37.5 mg, yield: 39%; <sup>1</sup>H NMR (300 MHz, CDCl<sub>3</sub>): δ 8.18 (d, *J* = 6.9 Hz, 1H), 8.09-8.06 (m, 2H), 7.60 (d, *J* = 9.0 Hz, 1H), 7.51-7.46 (m, 2H), 7.42-7.36 (m, 1H), 7.26-7.20 (m, 1H), 6.88 (t, *J* = 6.9 Hz, 1H); <sup>13</sup>C NMR (75 MHz, CDCl<sub>3</sub>): δ 148.2, 148.1, 133.6, 128.6, 128.43, 128.40, 126.6, 125.6, 117.6, 113.2, 59.6; HR-MS (ESI-TOF) *m/z*: calcd for C<sub>13</sub>H<sub>10</sub>IN<sub>2</sub> [M+H]<sup>+</sup> 320.9883, found 320.9881.

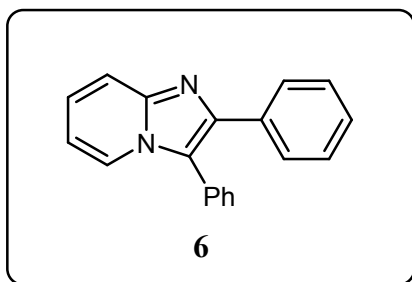

**2,3-Diphenylimidazo[1,2-a]pyridine (6).** White solid; m.p. 147-149 °C; 69.7 mg, yield: 86%; <sup>1</sup>H NMR (300 MHz, CDCl<sub>3</sub>): δ 7.83 (d, *J* = 6.9 Hz, 1H), 7.58-7.55 (m, 3H), 7.44-7.31 (m, 5H), 7.20-7.05 (m, 4H), 6.60 (t, *J* = 6.8 Hz, 1H); <sup>13</sup>C NMR (75 MHz, CDCl<sub>3</sub>): δ 144.9, 142.5, 134.3, 130.8, 130.0, 129.6, 129.0, 128.4, 128.2, 127.6, 124.7, 123.4, 121.2, 117.6, 112.3; HR-MS (ESI-TOF) *m/z*: calcd for C<sub>19</sub>H<sub>15</sub>N<sub>2</sub> [M+H]<sup>+</sup> 271.1230, found 271.1227.

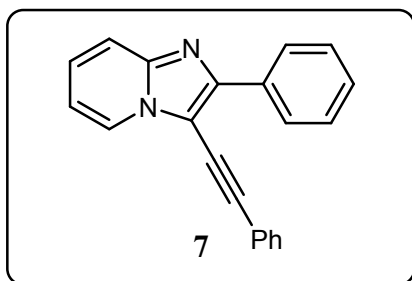

**2-Phenyl-3-(phenylethynyl)imidazo[1,2-a]pyridine (7).** Yellow solid; m.p. 159-161 °C; 63.6 mg, yield: 72%; <sup>1</sup>H NMR (300 MHz, CDCl<sub>3</sub>): δ 8.41-8.35 (m, 3H), 7.68 (dt, *J*<sub>1</sub> = 9.0 Hz, *J*<sub>2</sub> = 1.1 Hz, 1H), 7.64-7.59 (m, 2H), 7.53-7.47 (m, 2H), 7.45-7.37 (m, 4H), 7.31-7.26 (m, 1H), 6.93 (td, *J*<sub>1</sub> = 6.8 Hz, *J*<sub>2</sub> = 1.2 Hz, 1H); <sup>13</sup>C NMR (75 MHz, CDCl<sub>3</sub>): δ 148.1, 145.4, 133.6, 131.3, 128.8, 128.7, 127.4, 126.4, 125.3, 122.8, 117.6, 113.1, 104.8, 101.3, 78.4; HR-MS (ESI-TOF) *m/z*: calcd for C<sub>21</sub>H<sub>15</sub>N<sub>2</sub> [M+H]<sup>+</sup> 295.1230, found 295.1227.

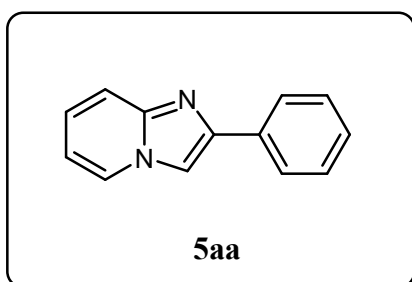

**2-Phenylimidazo[1,2-a]pyridine (5aa).** White solid; m.p. 132-134 °C; 30.9 mg, yield 53%; <sup>1</sup>H NMR (300 MHz, CDCl<sub>3</sub>): δ 8.11 (d, *J* = 7.1 Hz, 1H), 7.98-7.95 (m, 2H), 7.85 (s, 1H), 7.64 (d, *J* = 9.1 Hz, 1H), 7.47-7.42 (m, 2H), 7.36-7.30 (m, 1H), 7.19-7.14 (m, 1H), 6.77 (t, *J* = 6.8 Hz, 1H); <sup>13</sup>C NMR (75 MHz, CDCl<sub>3</sub>): δ 145.9, 145.8, 133.8, 128.9, 128.1, 126.2, 125.7, 124.8, 117.7, 112.6, 108.2; HR-MS (ESI-TOF) *m/z*: calcd for C<sub>13</sub>H<sub>11</sub>N<sub>2</sub> [M + H]<sup>+</sup> 195.0917, found 195.0915.

# $^1\text{H}$ and $^{13}\text{C}$ NMR spectra

## *N*-(Pyridin-2-yl)benzamide (3aa)

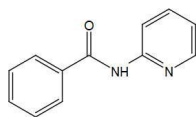

8.83  
8.30  
8.27  
8.10  
8.08  
7.82  
7.80  
7.66  
7.63  
7.61  
7.47  
7.45  
7.42  
7.39  
7.37  
7.34  
7.14  
6.95  
6.93

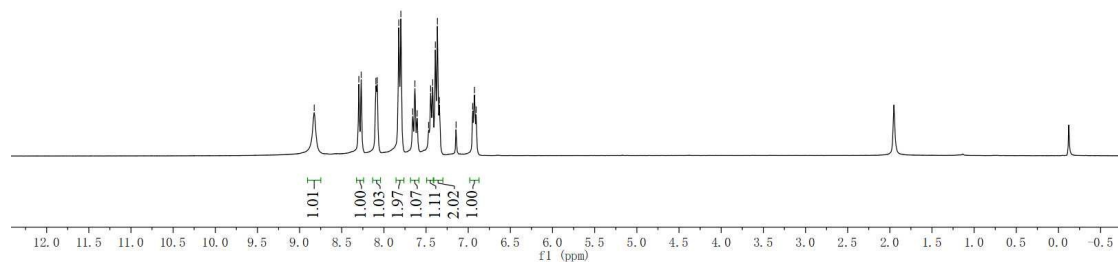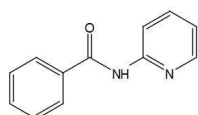

166.0  
151.8  
148.0  
138.6  
134.4  
132.3  
128.9  
127.4  
120.0  
114.4  
77.6  
77.2  
76.7

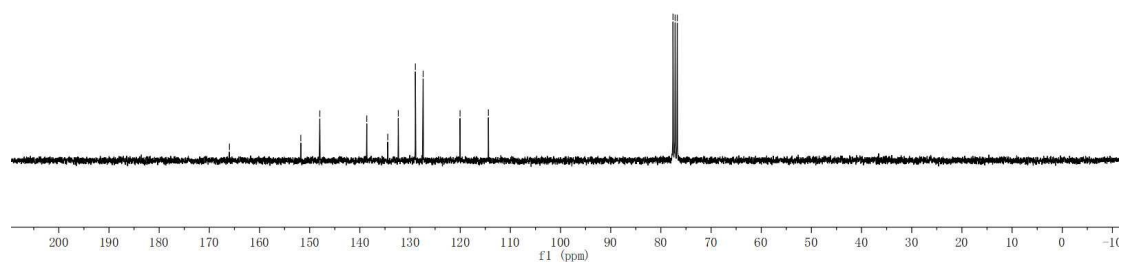

### 4-Methyl-N-(pyridin-2-yl)benzamide (3ba)

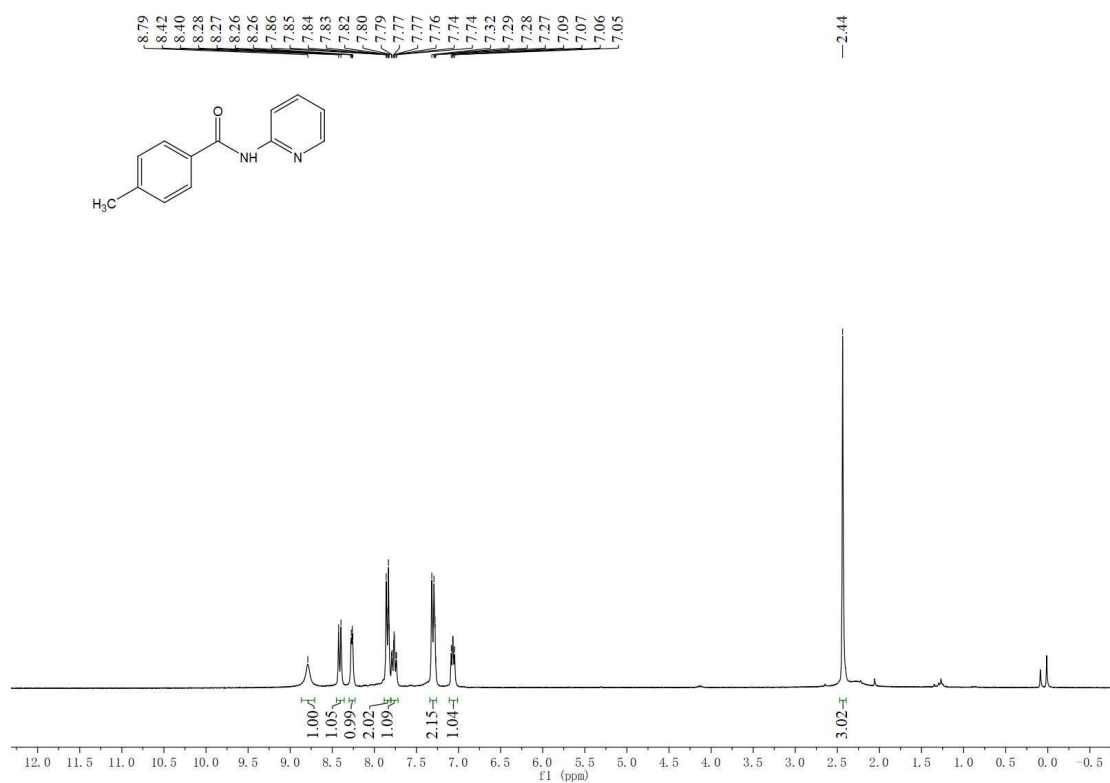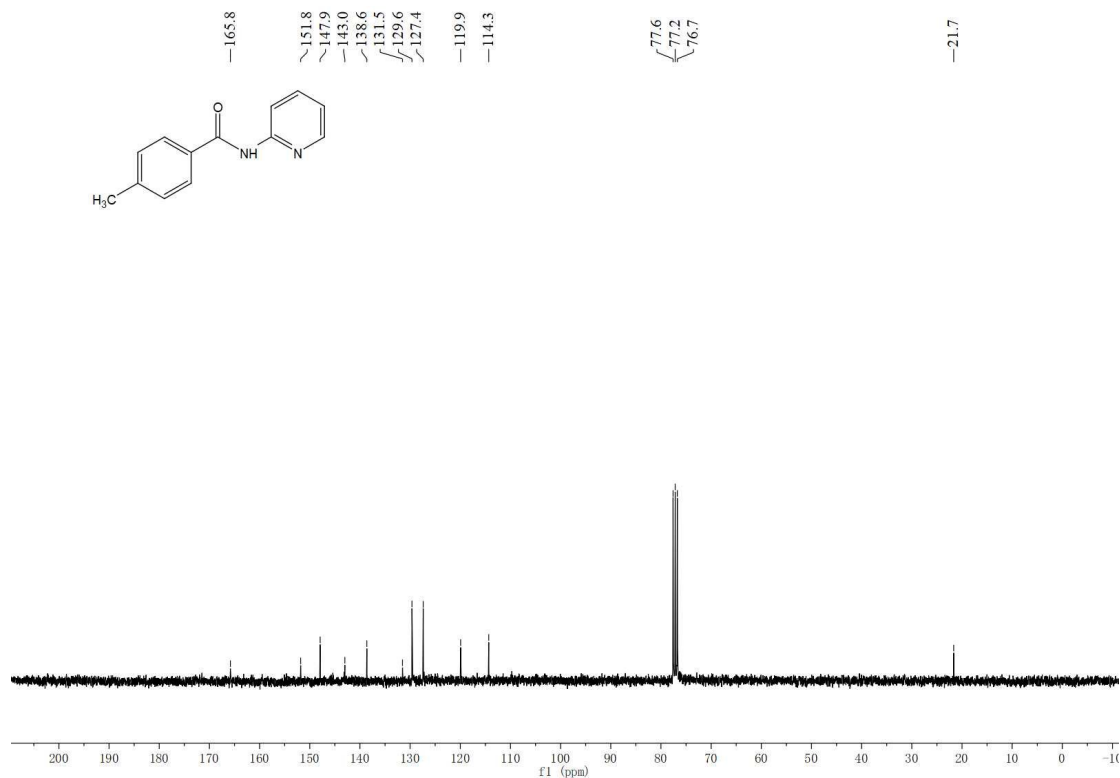

### 4-Bromo-N-(pyridin-2-yl)benzamide (3ca)

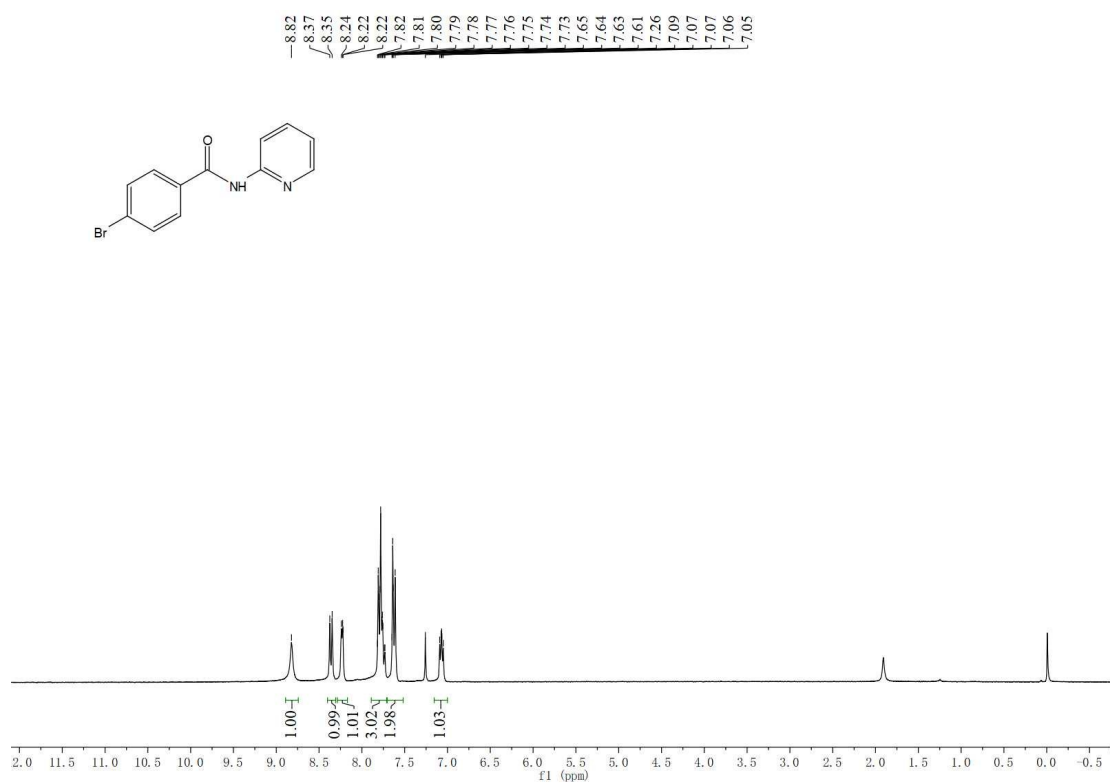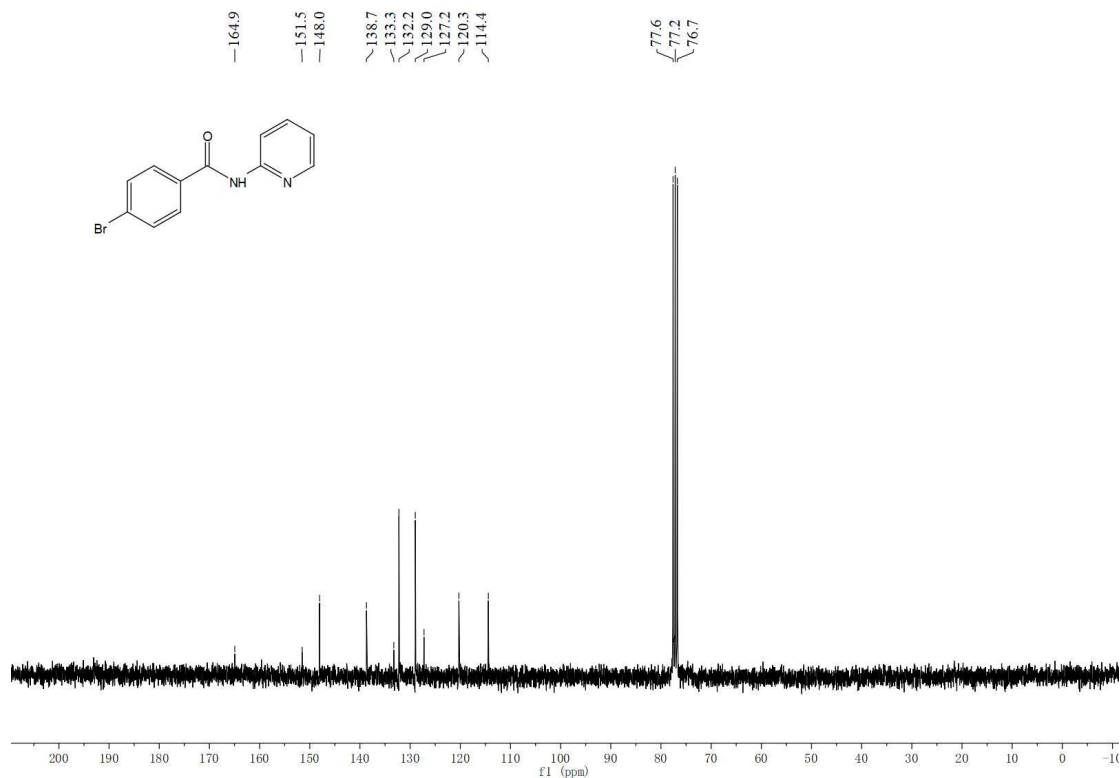



# 4-Fluoro-N-(pyridin-2-yl)benzamide (3da)

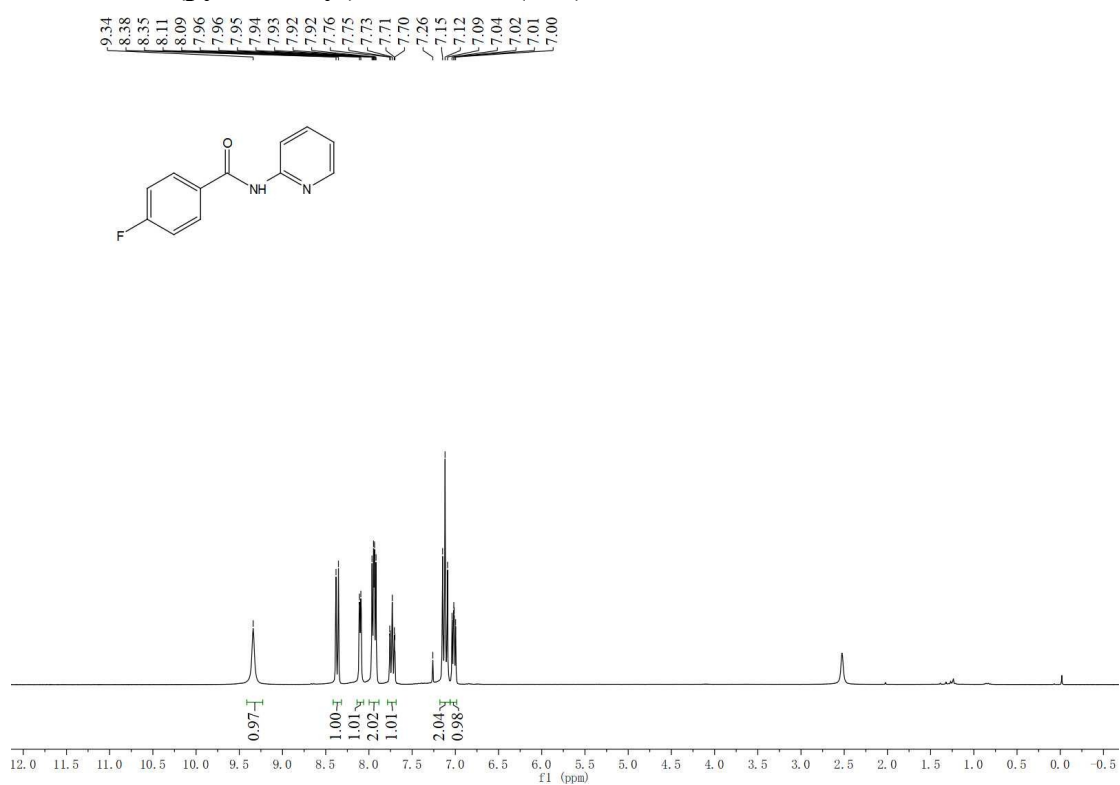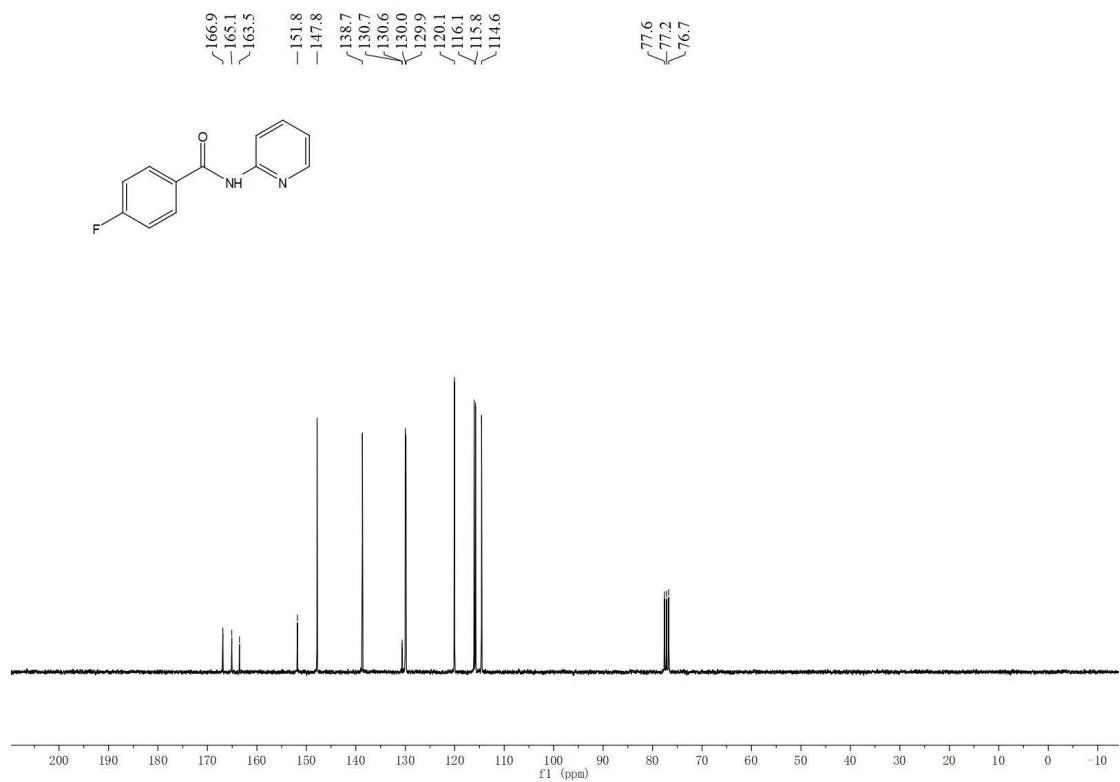

# *N*-(Pyridin-2-yl)-4-(trifluoromethyl)benzamide (3ea)

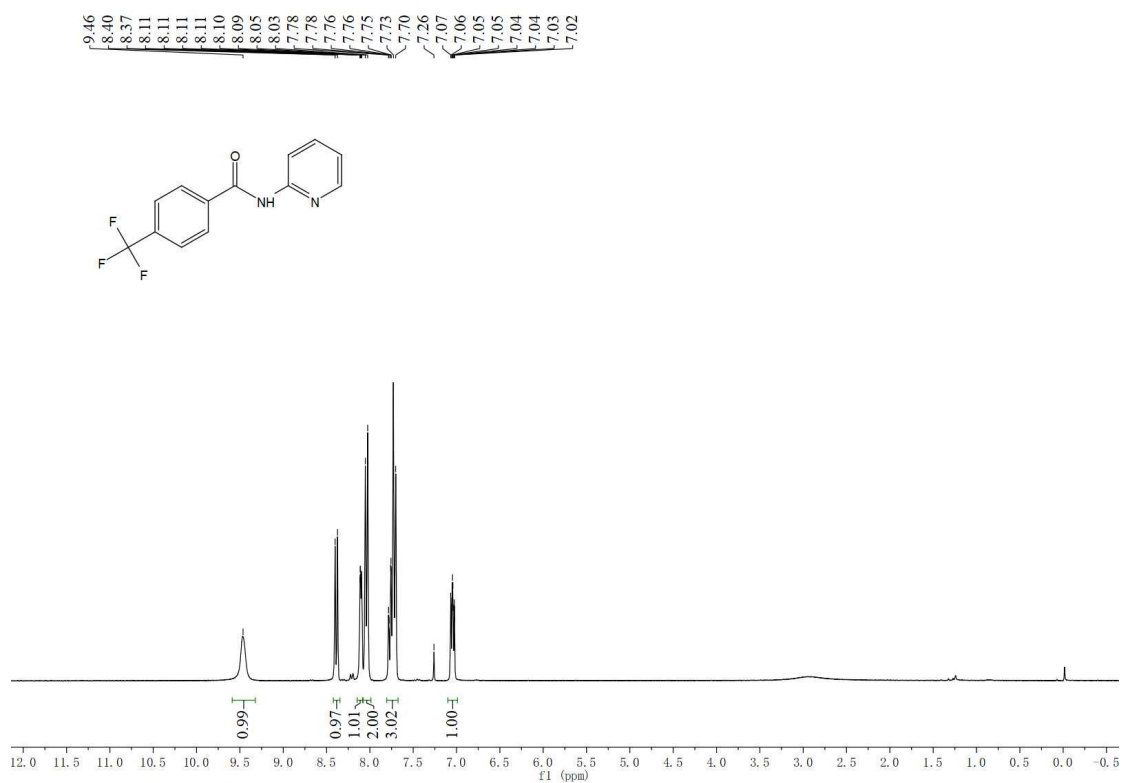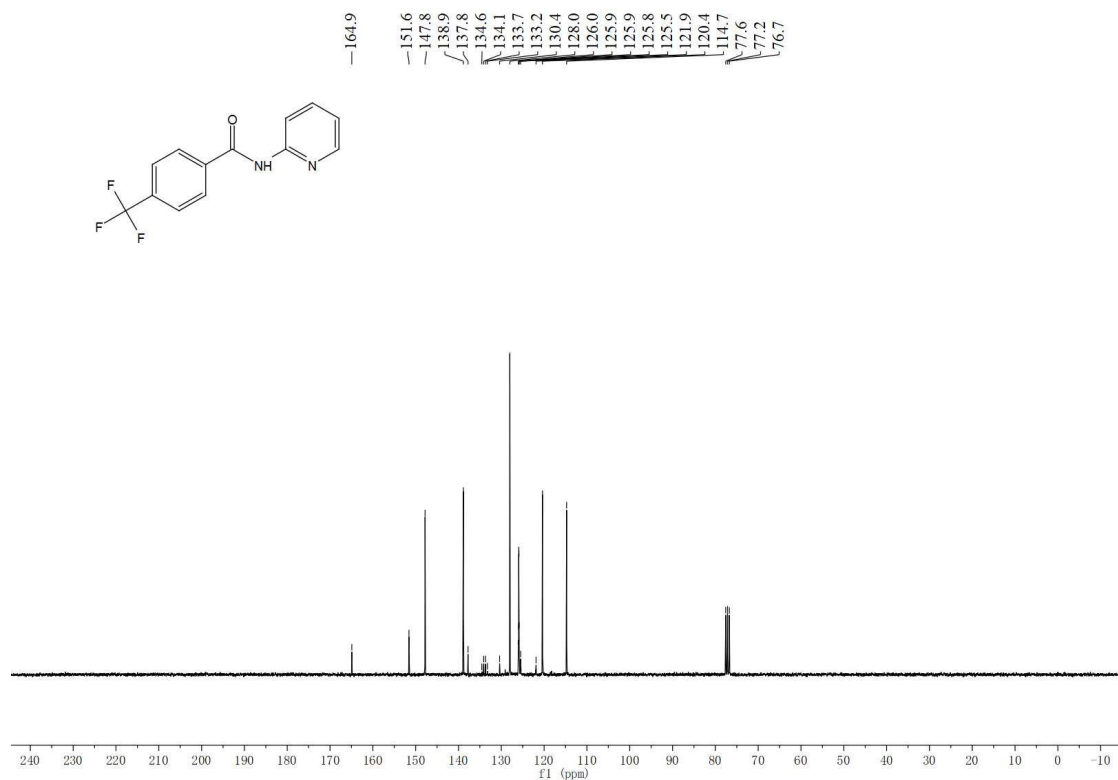

### 4-Methoxy-N-(pyridin-2-yl)benzamide (3fa)

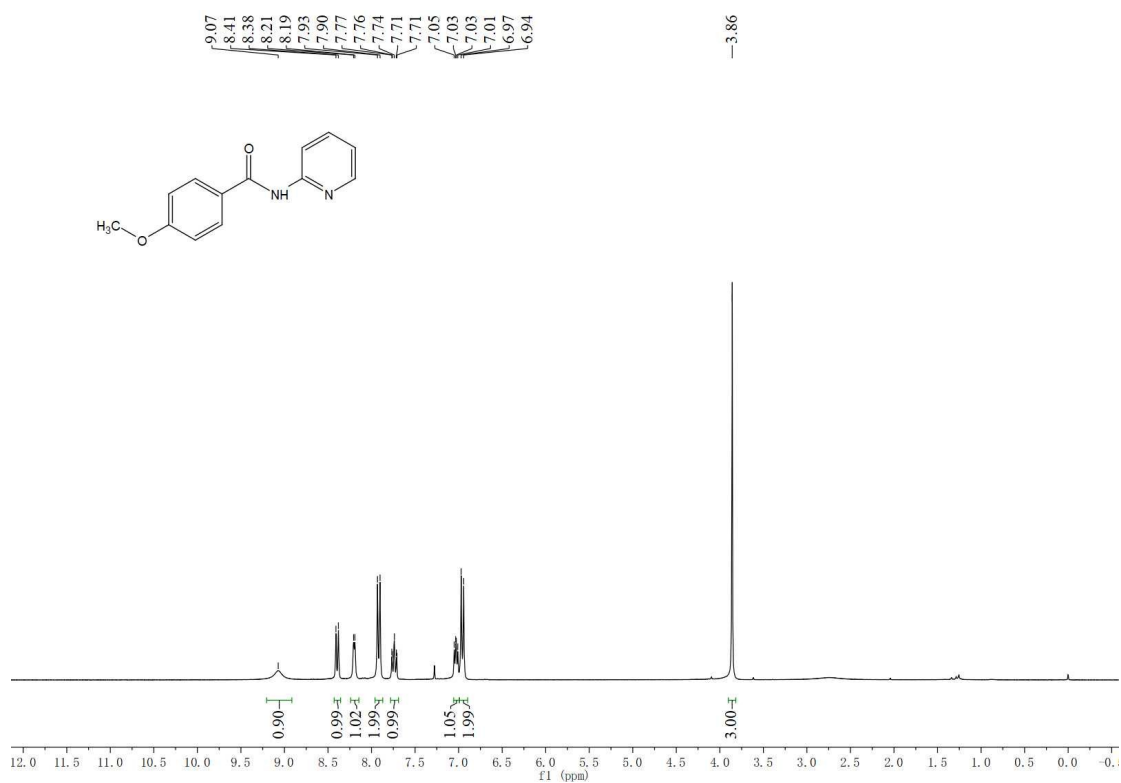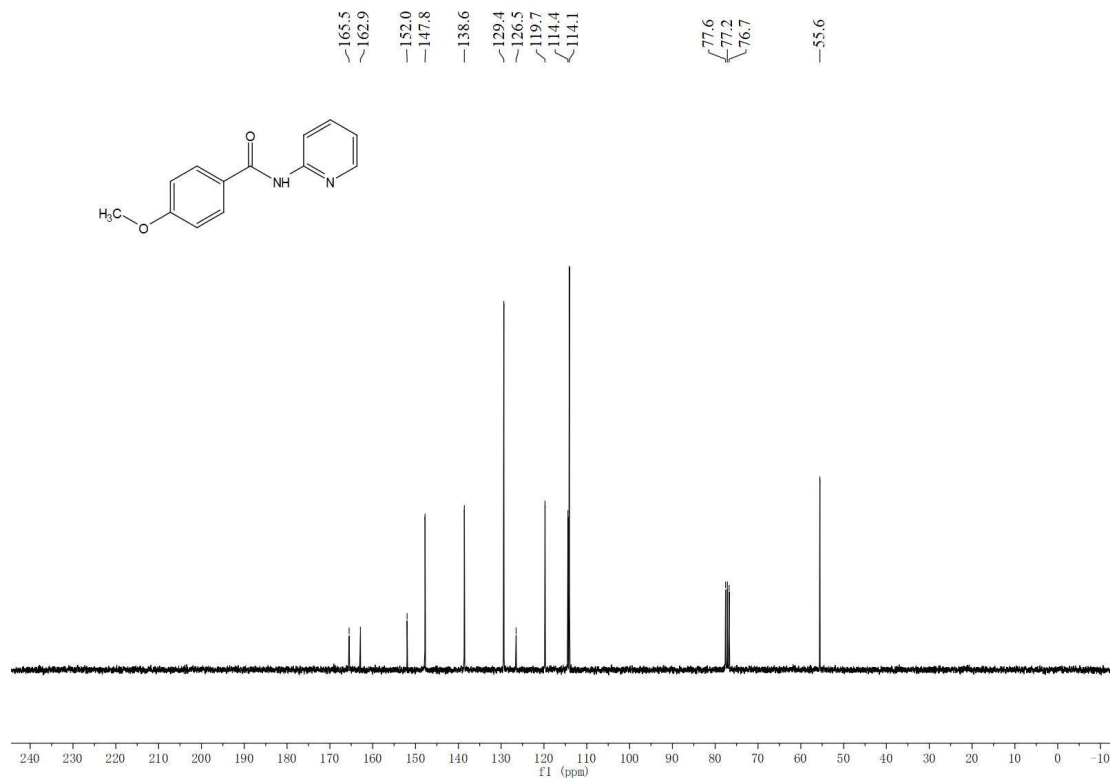

### 3-Methyl-N-(pyridin-2-yl)benzamide (3ga)

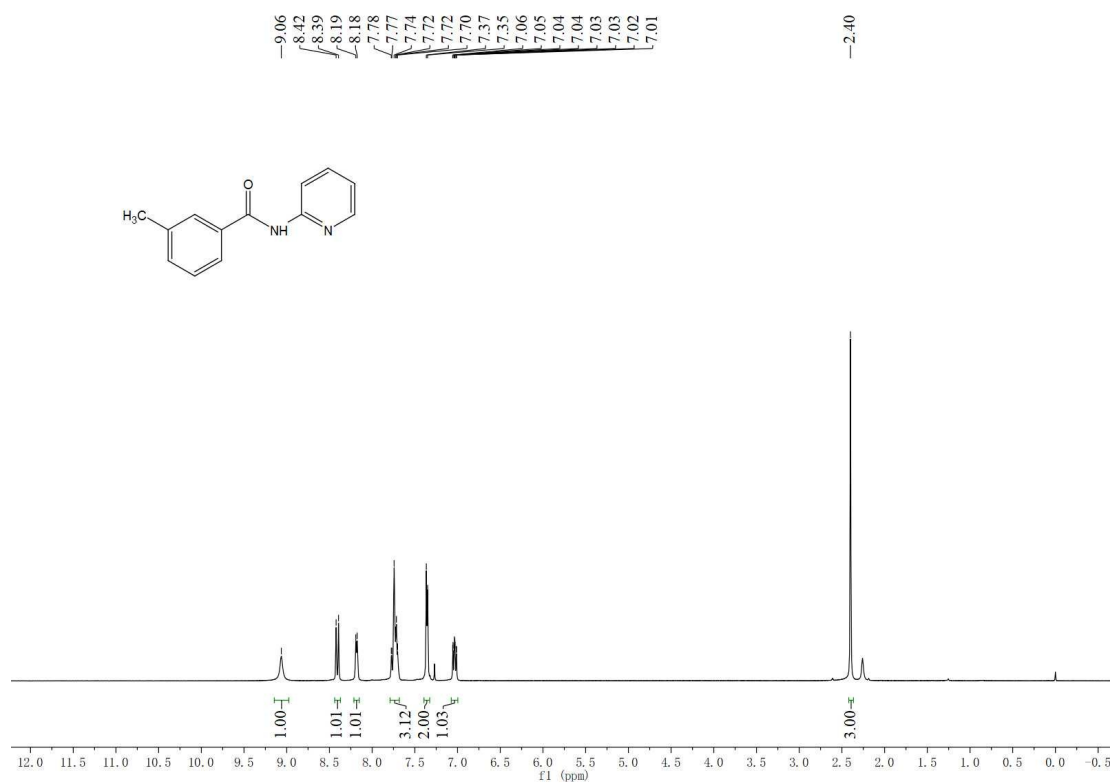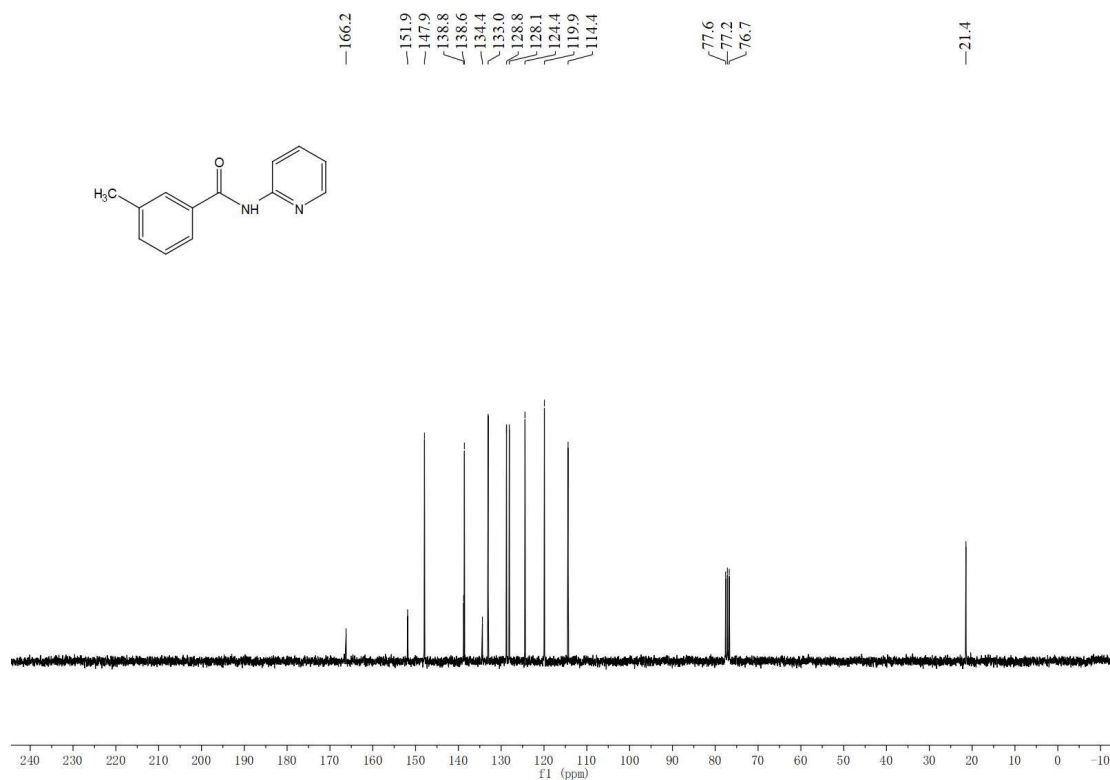

### 3-Methoxy-N-(pyridin-2-yl)benzamide (3ha)

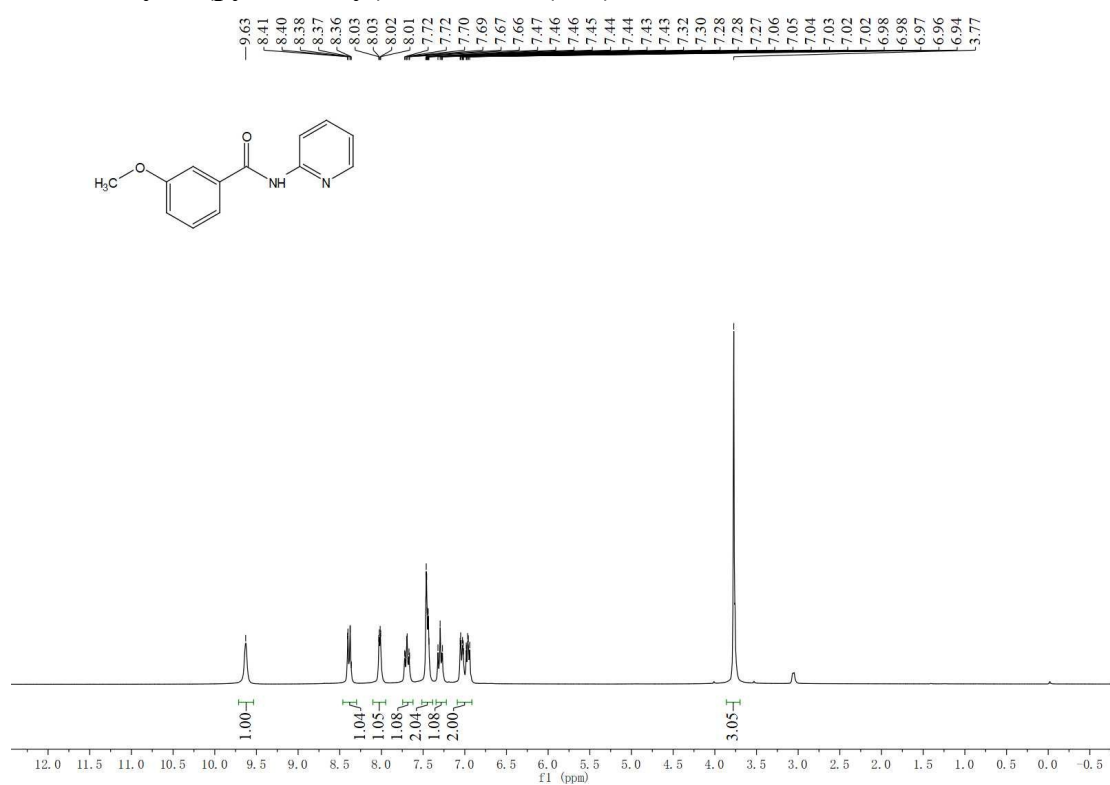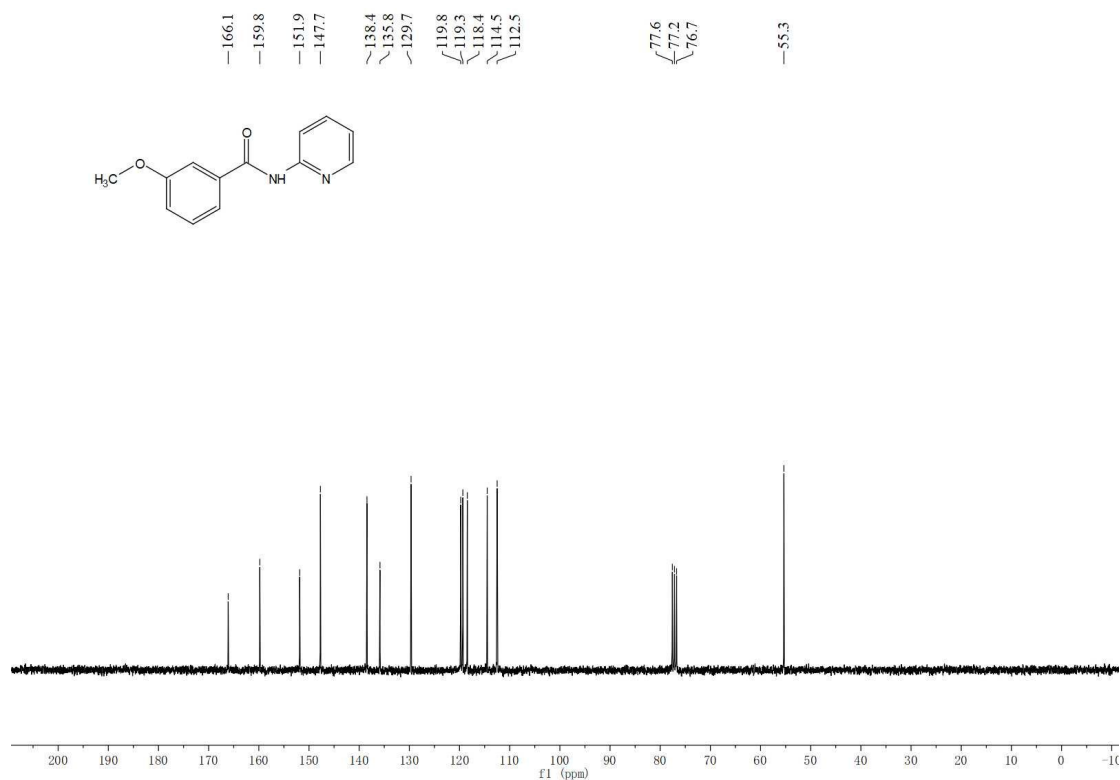

## 2-Methyl-N-(pyridin-2-yl)benzamide (3ia)

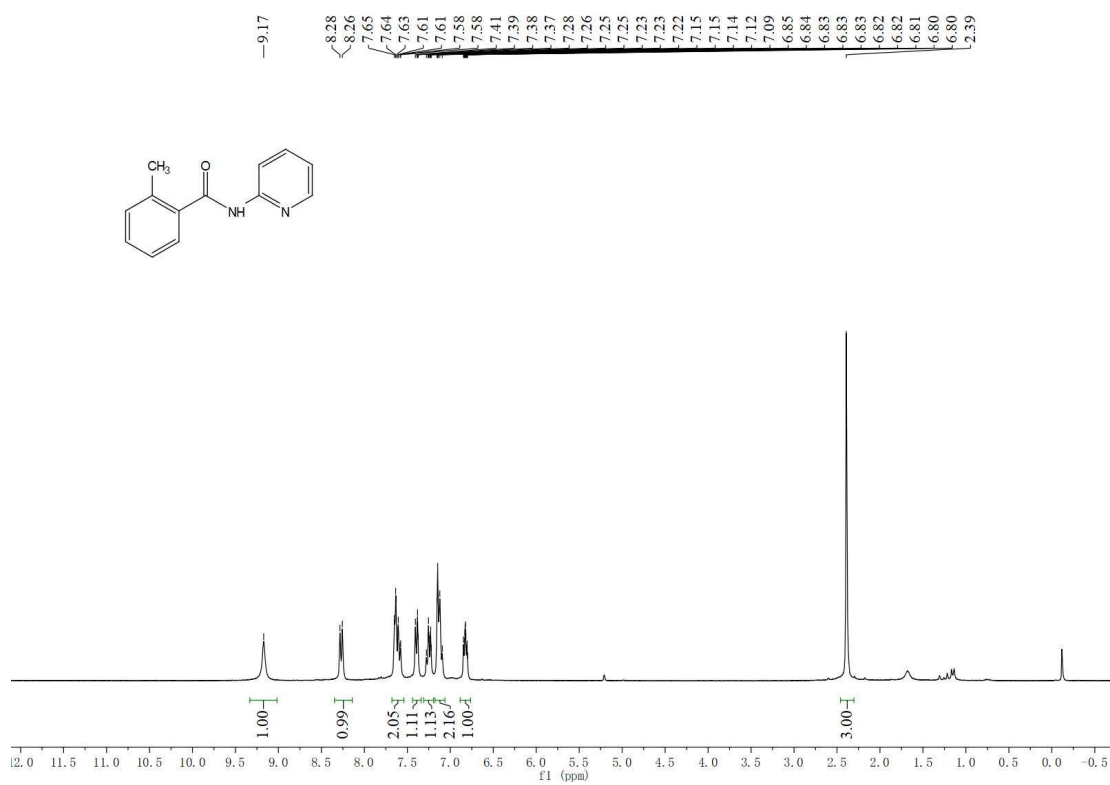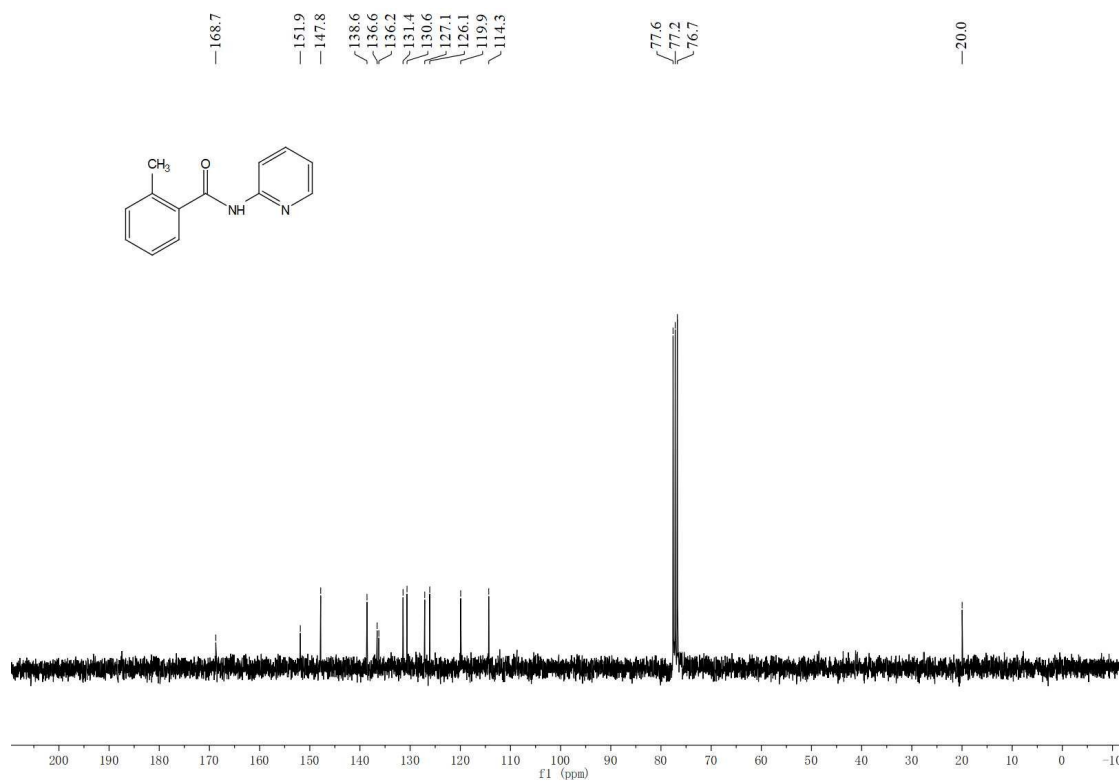

## 2-Methoxy-N-(pyridin-2-yl)benzamide (3ja)

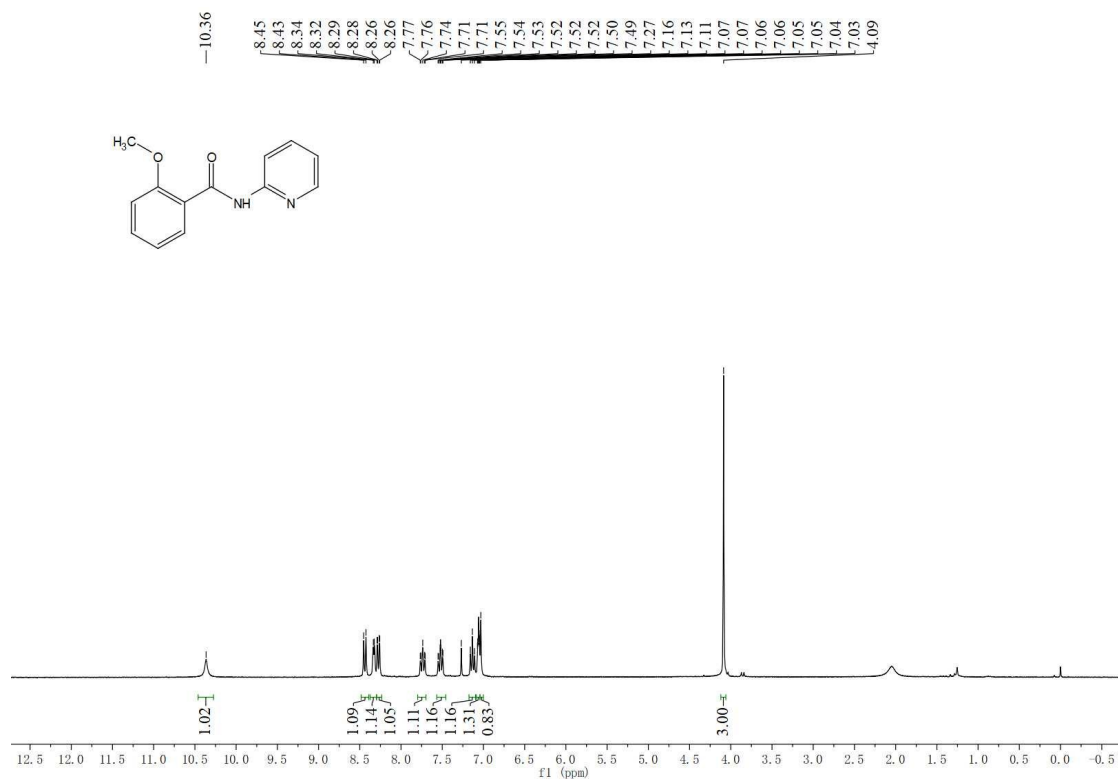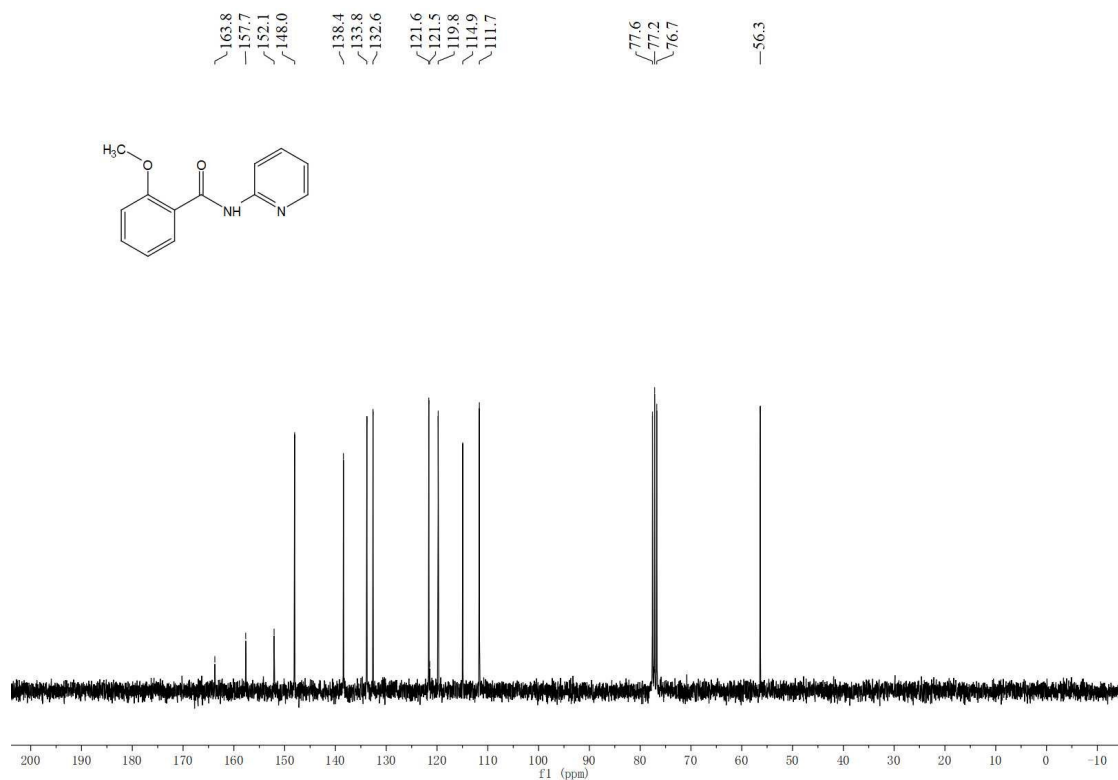

## 2,4-Dichloro-N-(pyridin-2-yl)benzamide (3ka)

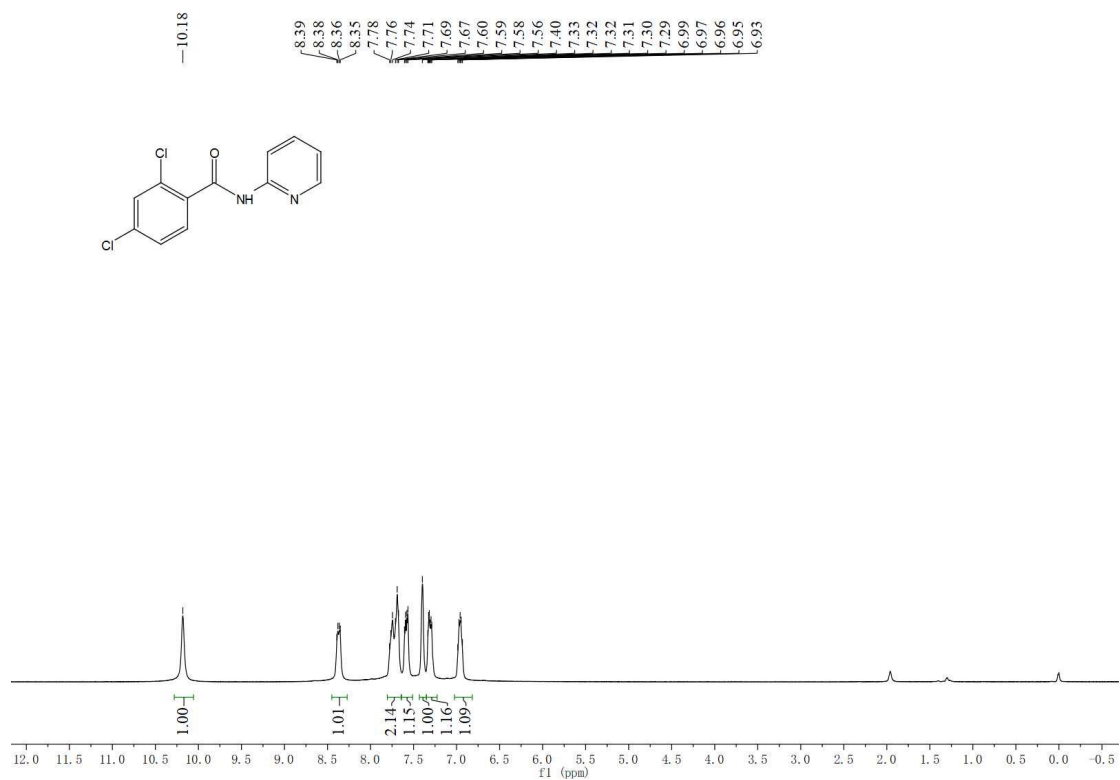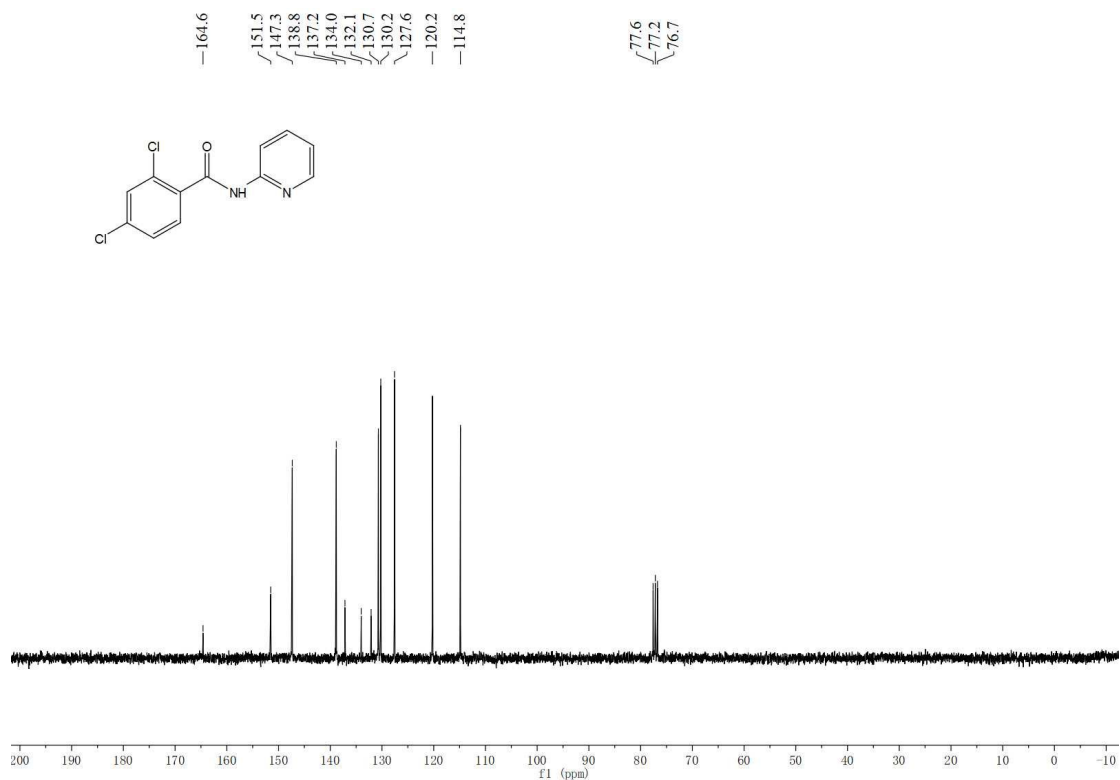



# 2,4-Dichloro-5-fluoro-N-(pyridin-2-yl)benzamide (3la)

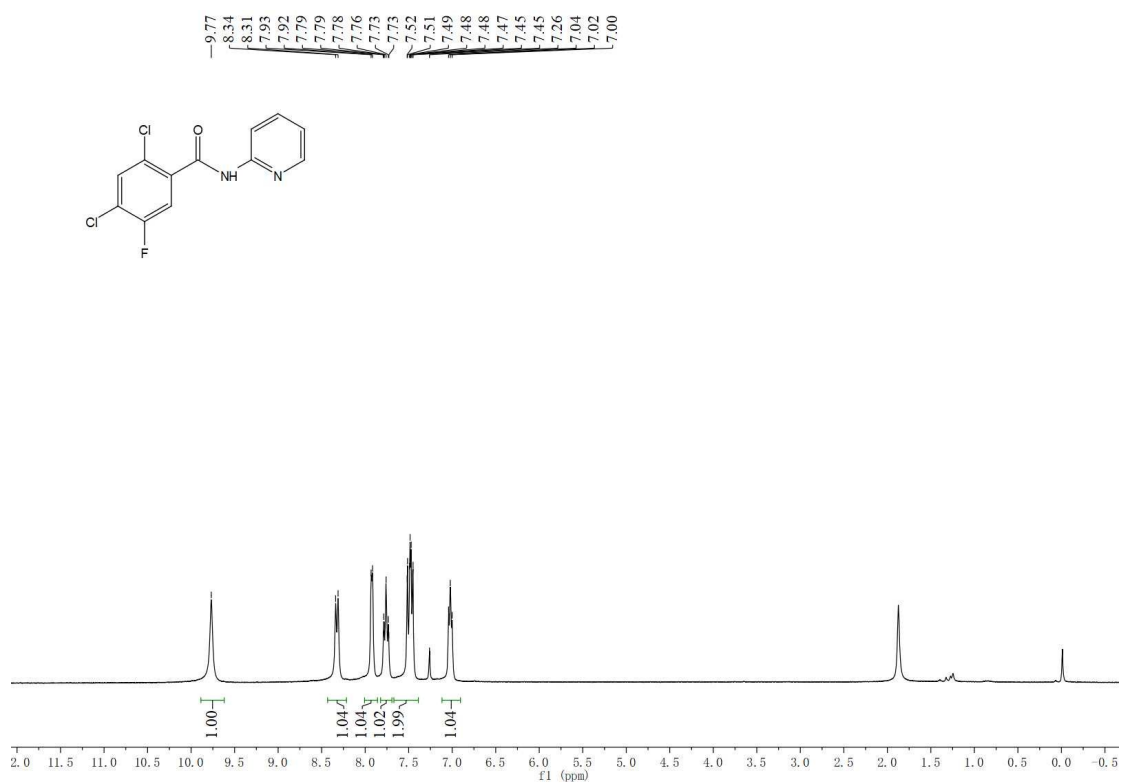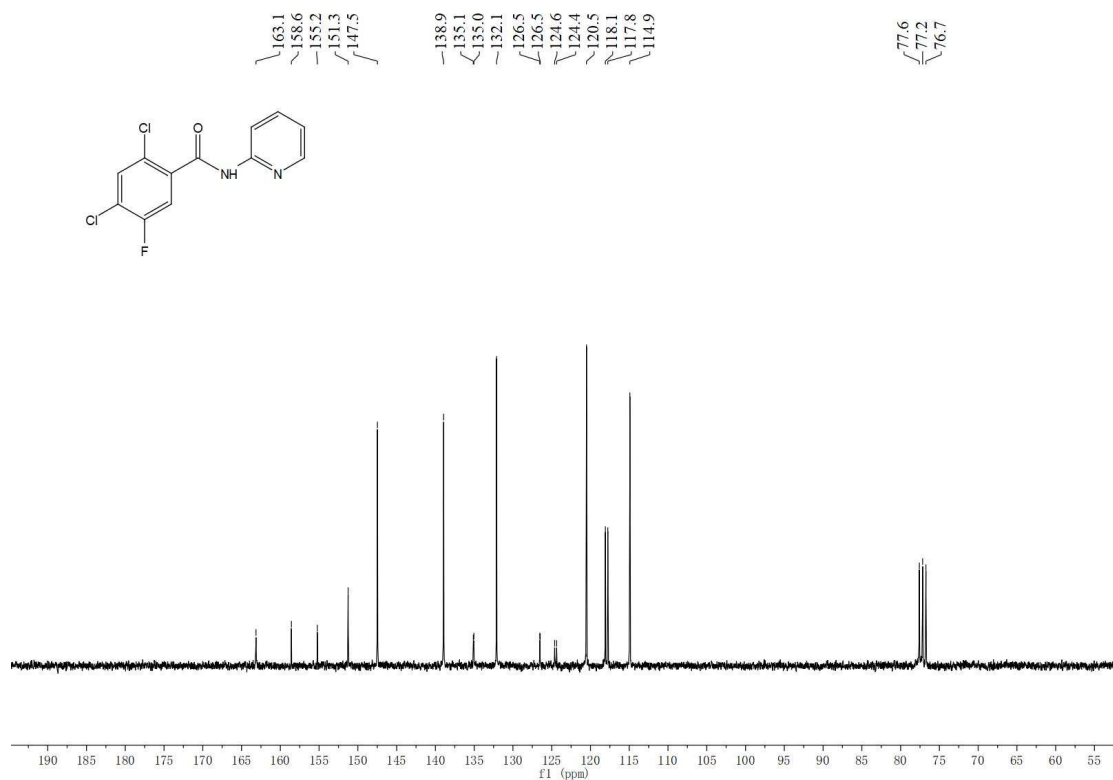

# *N*-(Pyridin-2-yl)thiophene-2-carboxamide (3ma)

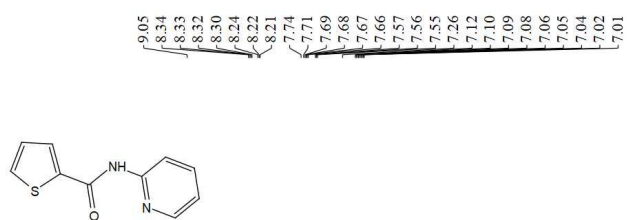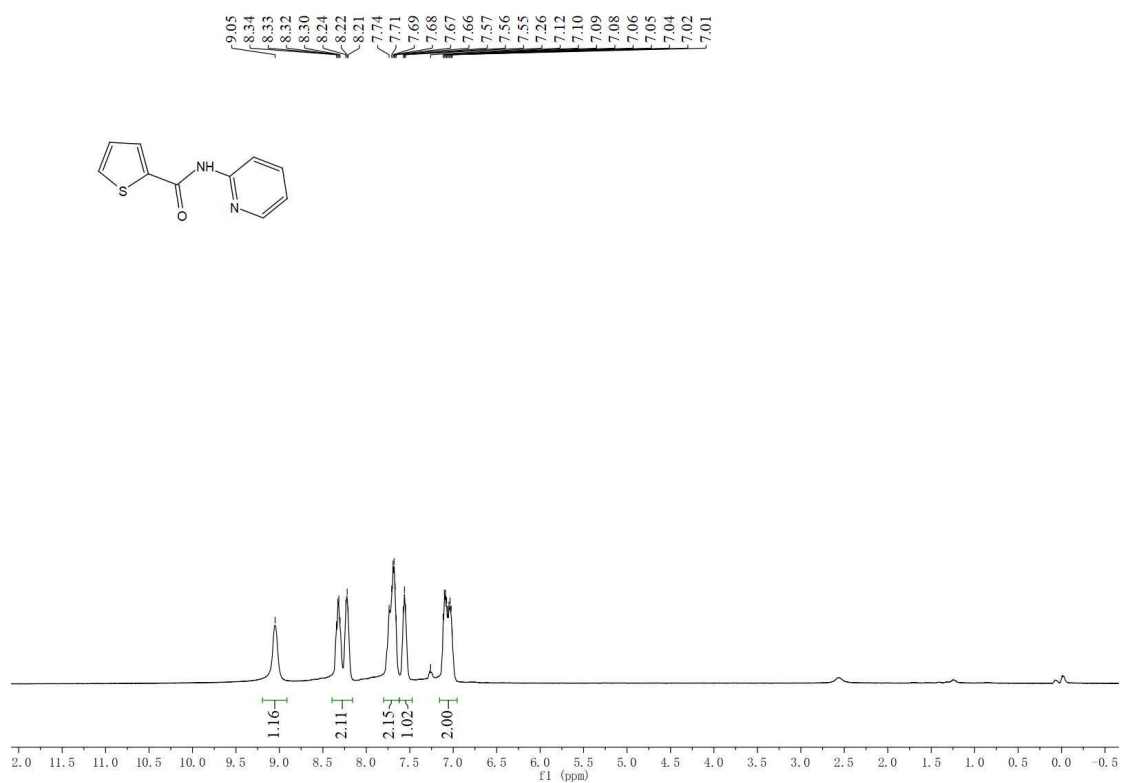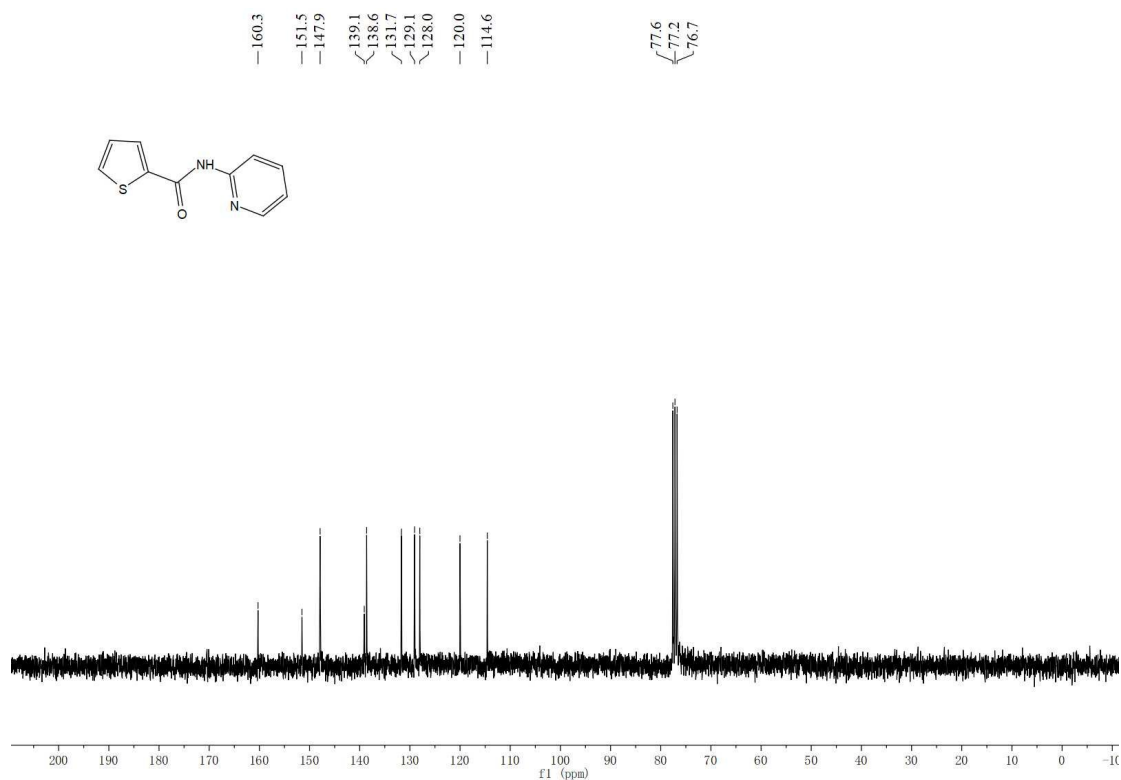

# *N*-(Pyridin-2-yl)acetamide (3na)

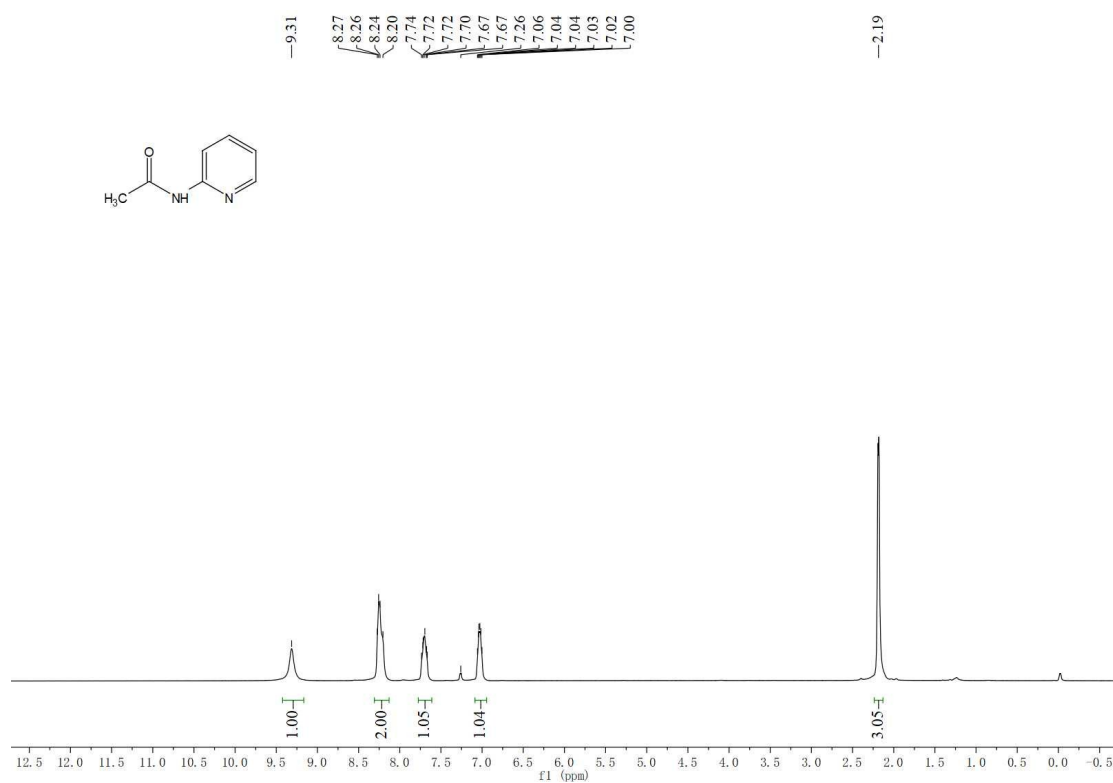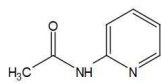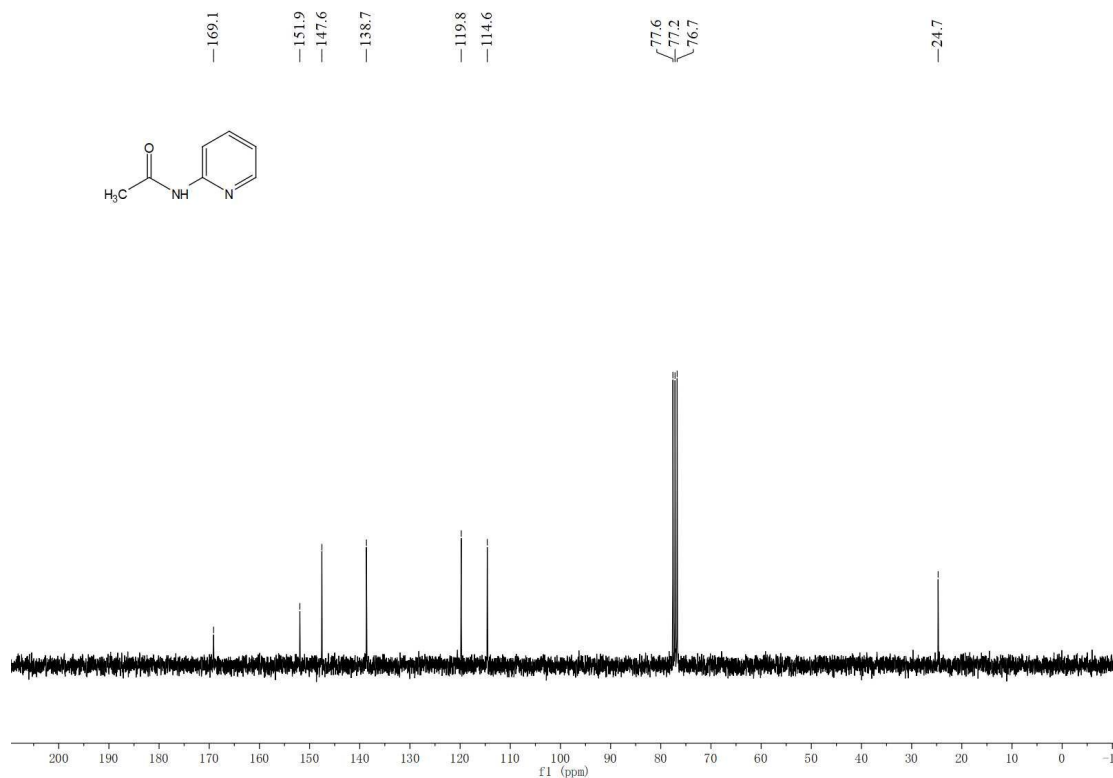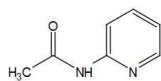

# *N*-(3-Methylpyridin-2-yl)benzamide (3ab)

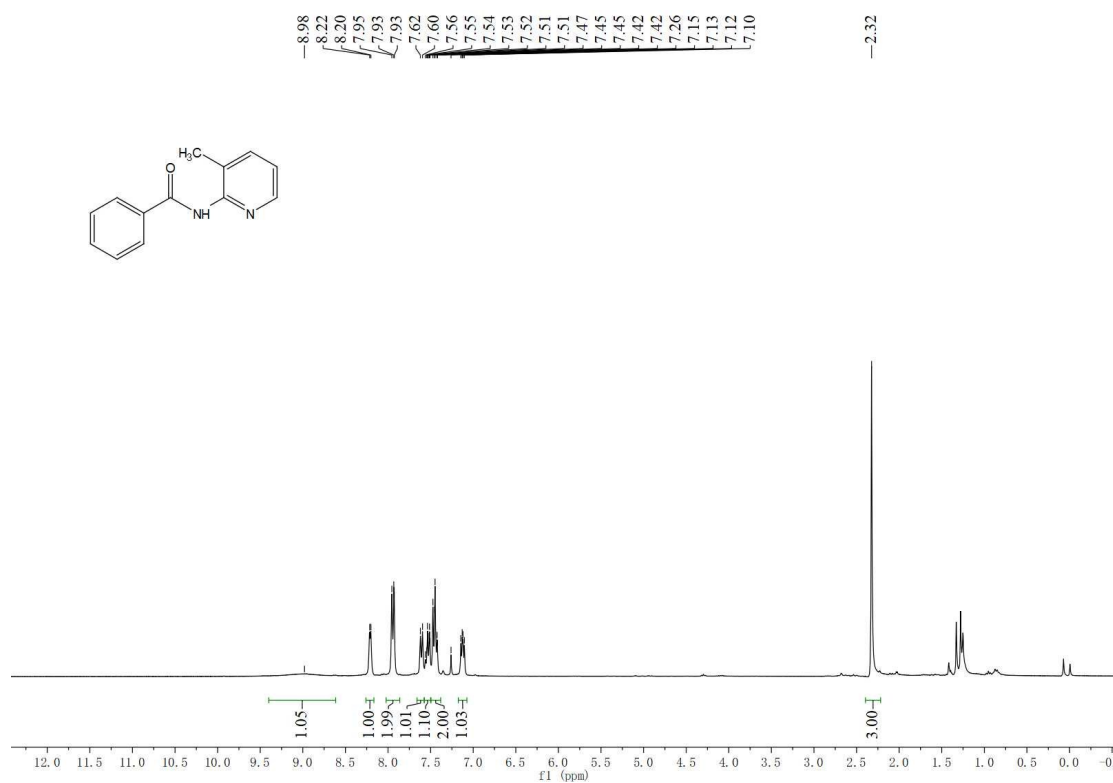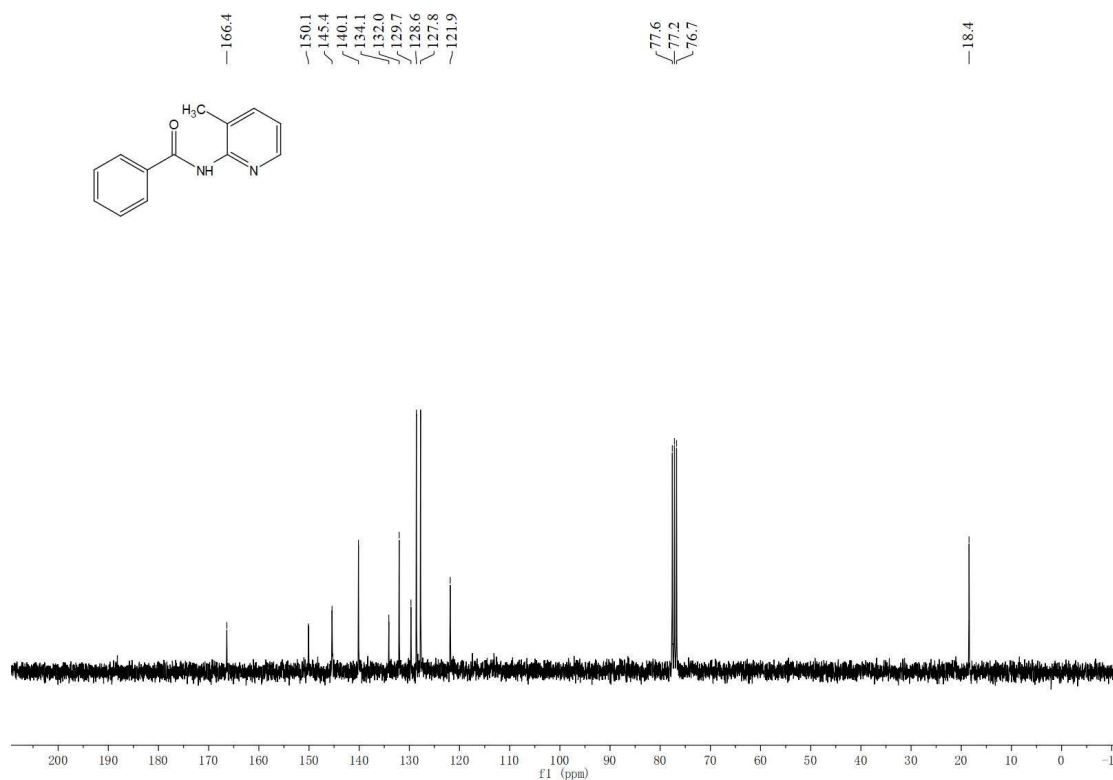

# N-(4-Methylpyridin-2-yl)benzamide (3ac)

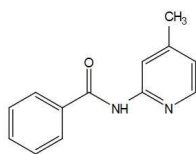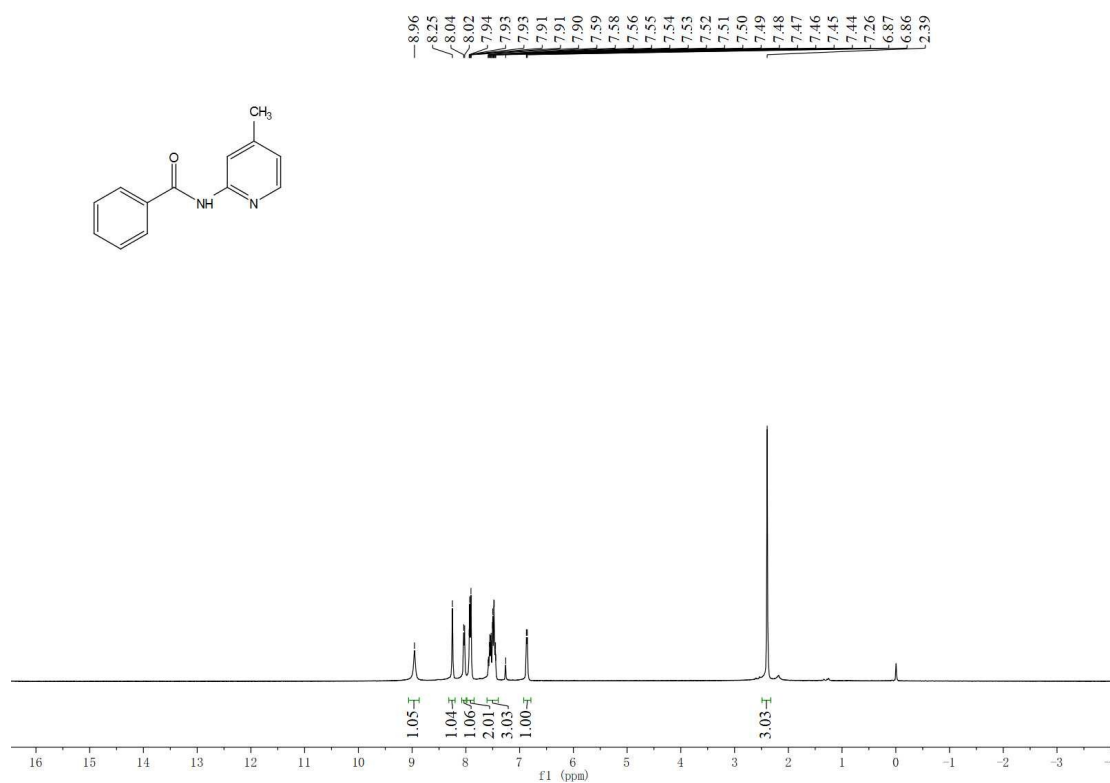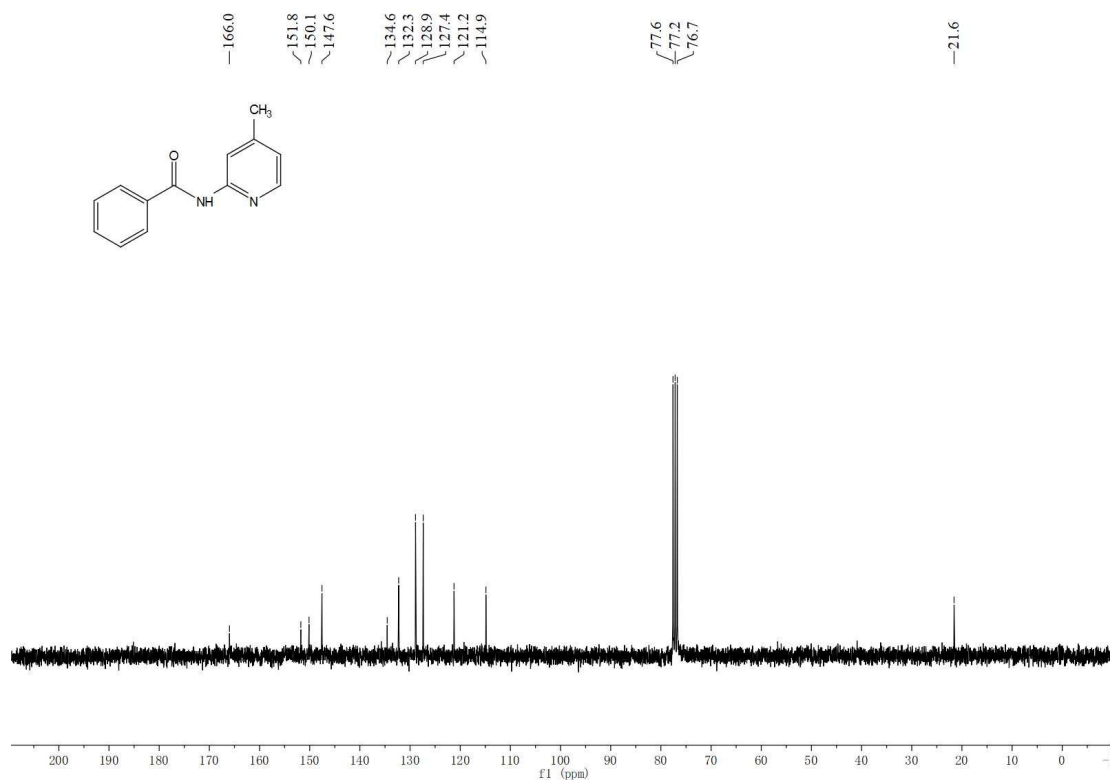

# *N*-(5-Methylpyridin-2-yl)benzamide (3ad)

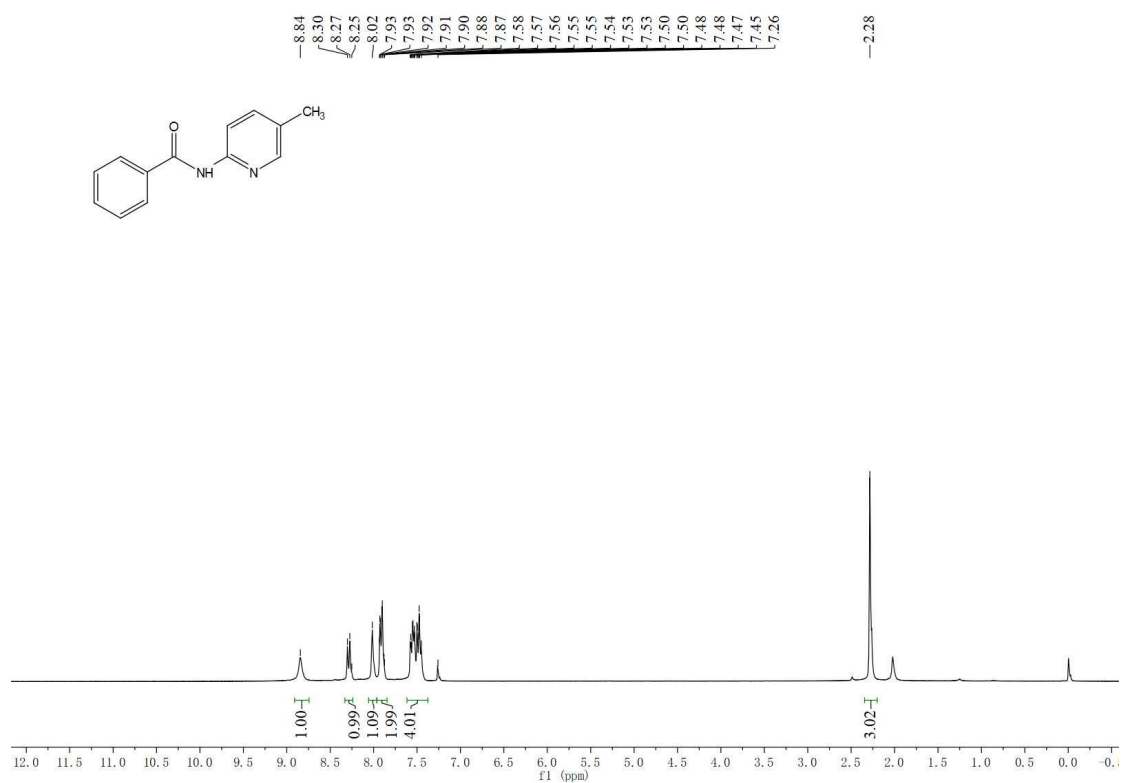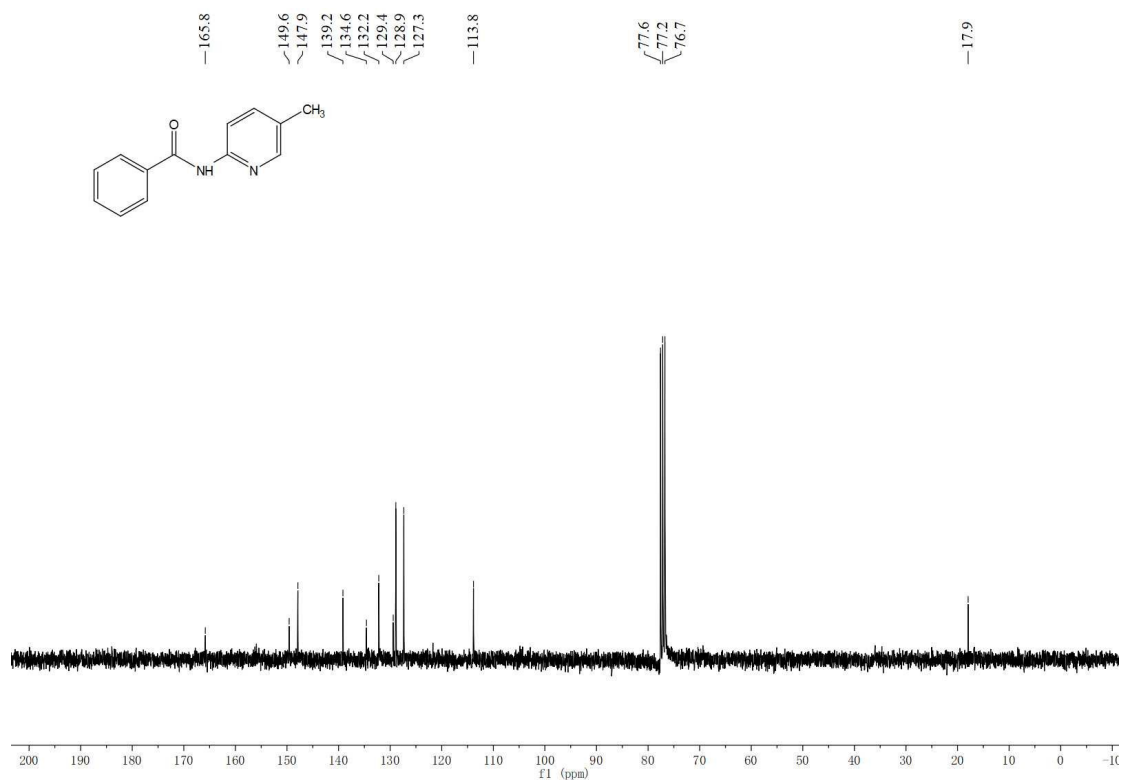

# *N*-(6-Methylpyridin-2-yl)benzamide (3ae)

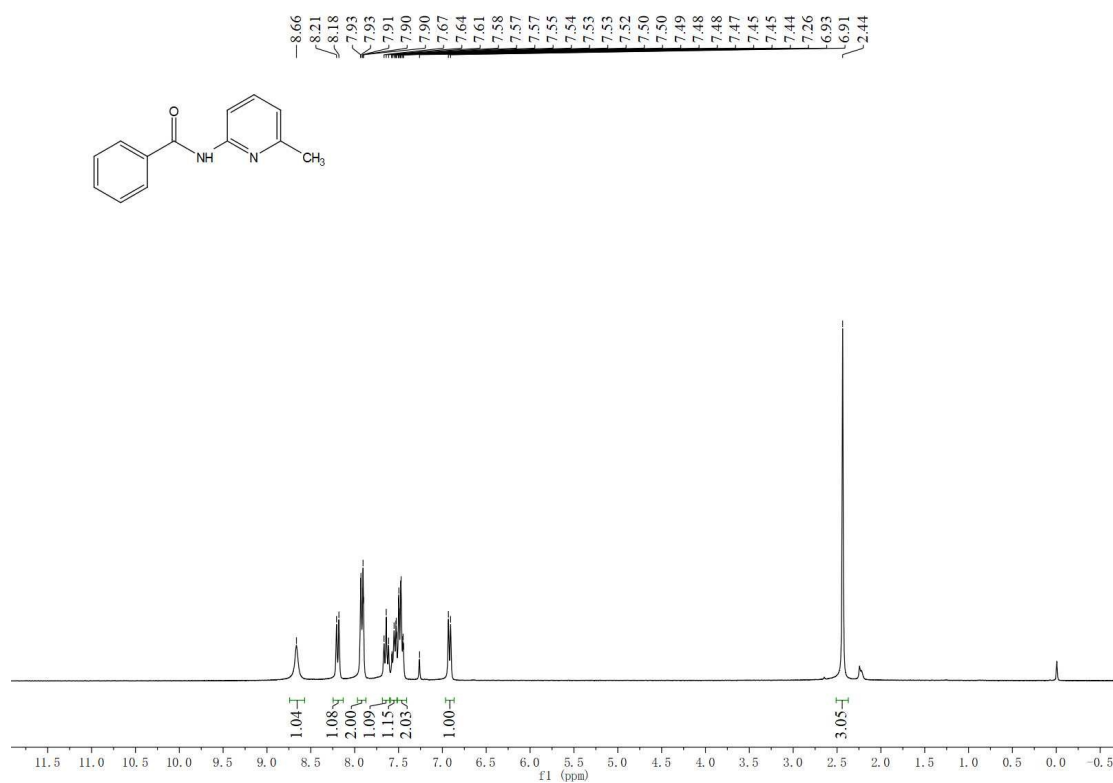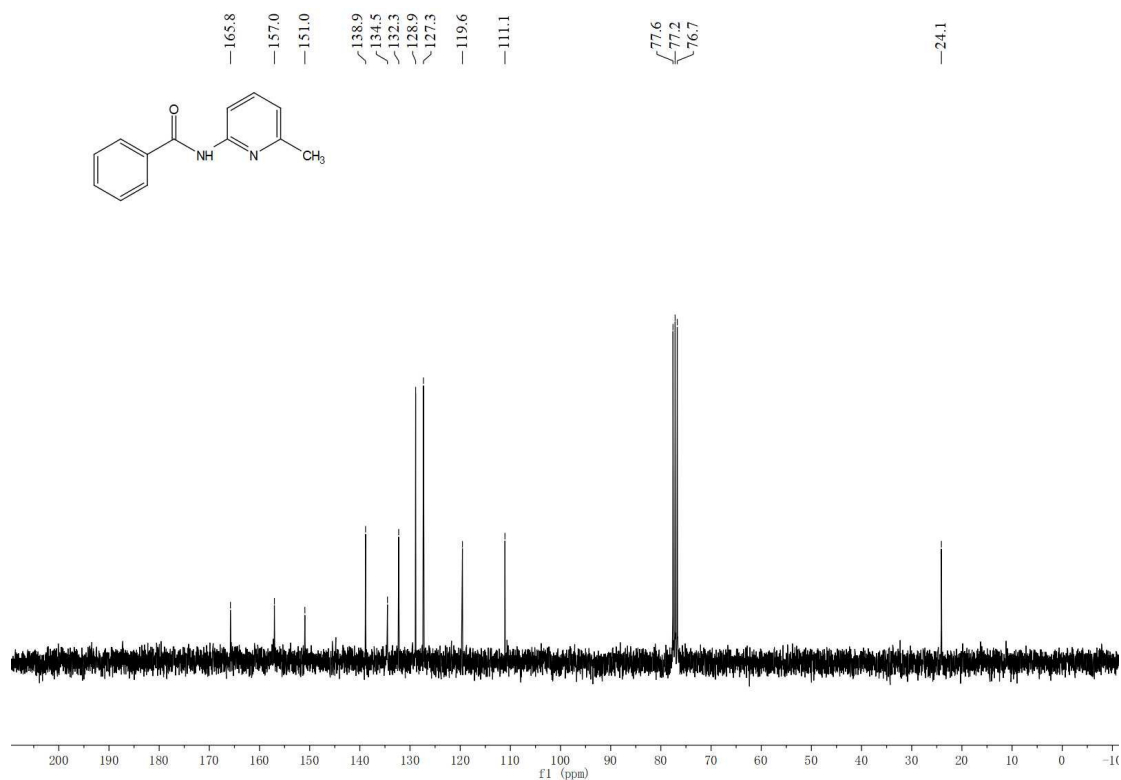

# N-(3-Fluoropyridin-2-yl)benzamide (3af)

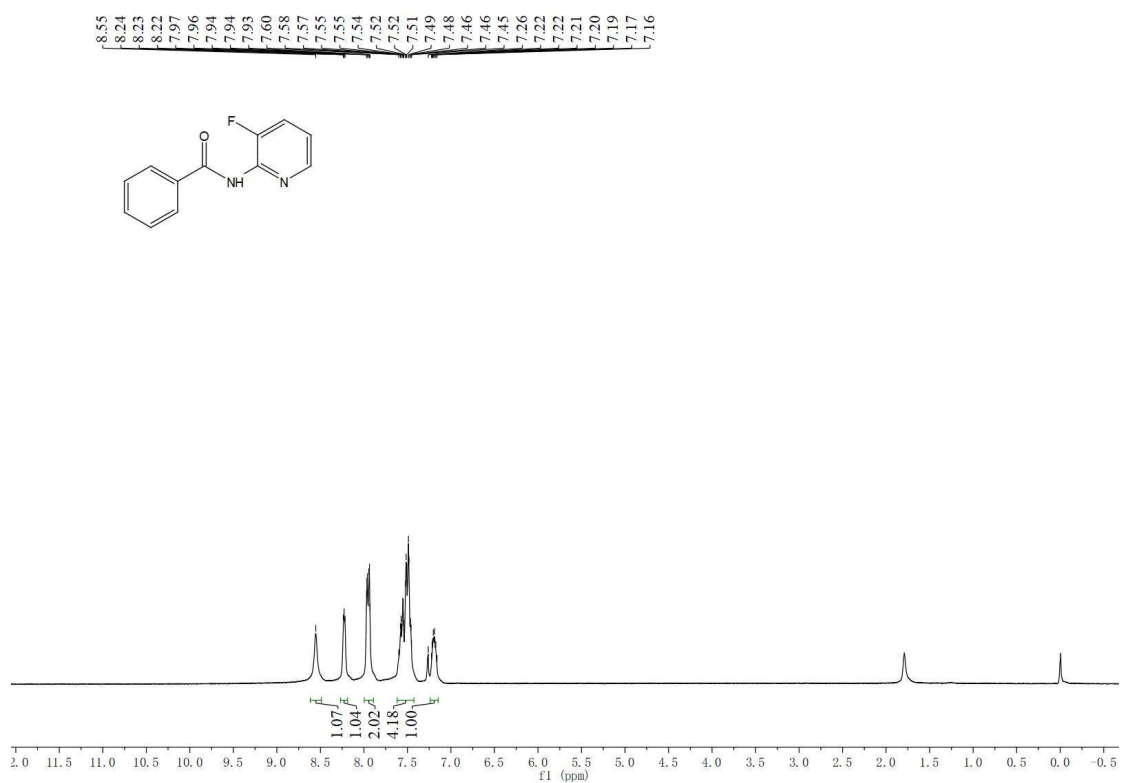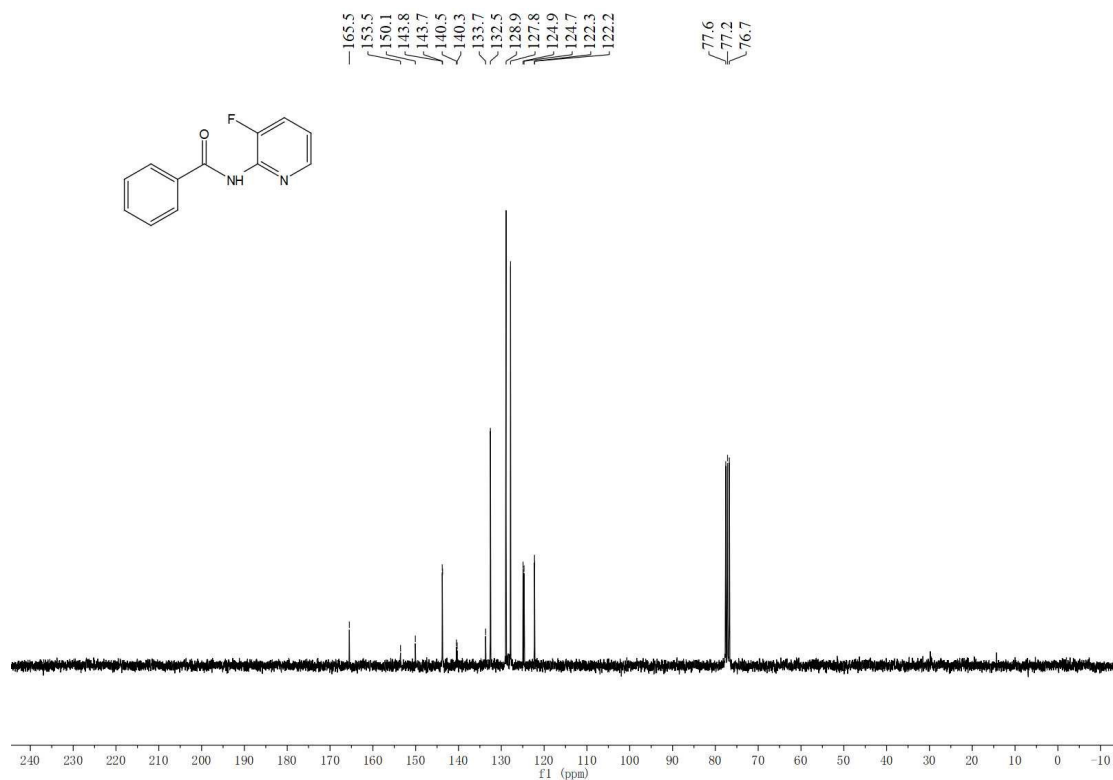



# N-(4-Methoxypyridin-2-yl)benzamide (3ag)

9.89  
8.08  
8.07  
8.06  
8.06  
7.93  
7.92  
7.91  
7.89  
7.89  
7.74  
7.73  
7.72  
7.71  
7.69  
7.55  
7.53  
7.52  
7.51  
7.50  
7.49  
7.45  
7.44  
7.43  
7.42  
7.40  
7.39  
6.52  
6.51  
6.50  
6.49  
6.48  
6.48  
-3.86

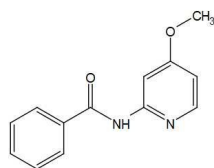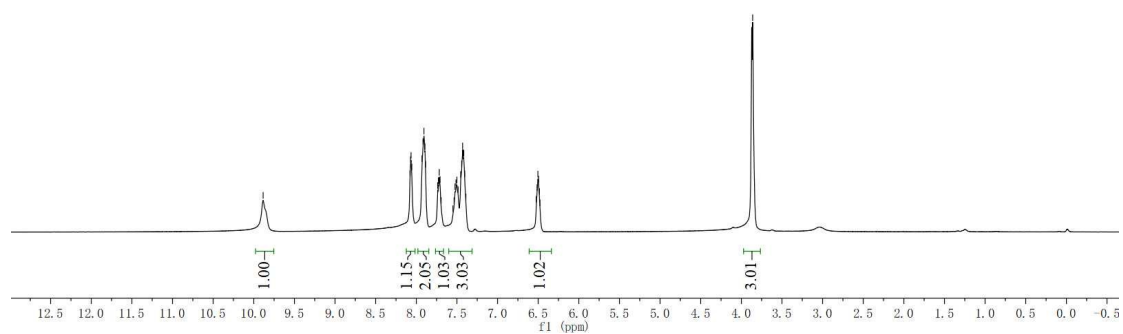

167.5  
166.6  
153.7  
148.3  
134.6  
132.1  
128.7  
127.5  
107.7  
99.1  
77.6  
77.2  
76.7  
55.4

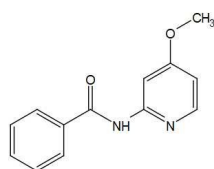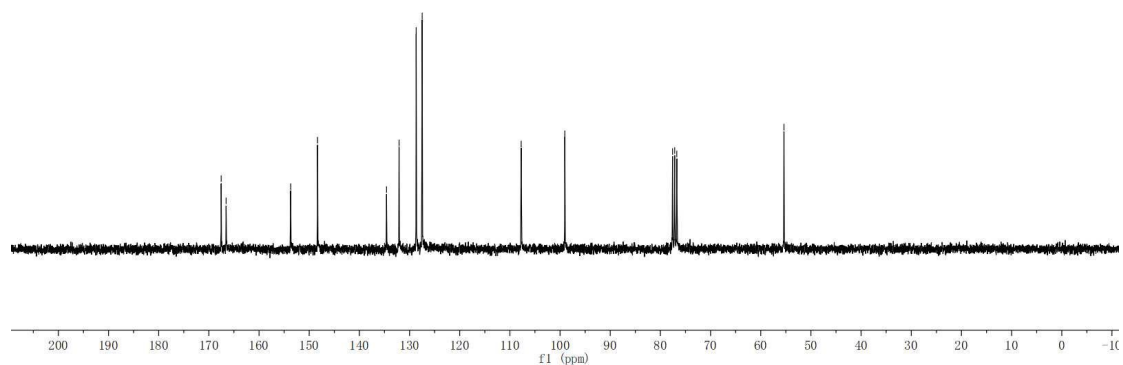

# *N*-(6-Fluoropyridin-2-yl)benzamide (3ah)

8.67  
8.25  
8.23  
7.88  
7.86  
7.83  
7.81  
7.80  
7.78  
7.75  
7.55  
7.54  
7.53  
7.50  
7.47  
7.46  
7.44  
7.41  
7.26  
6.66  
6.65  
6.63

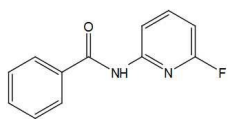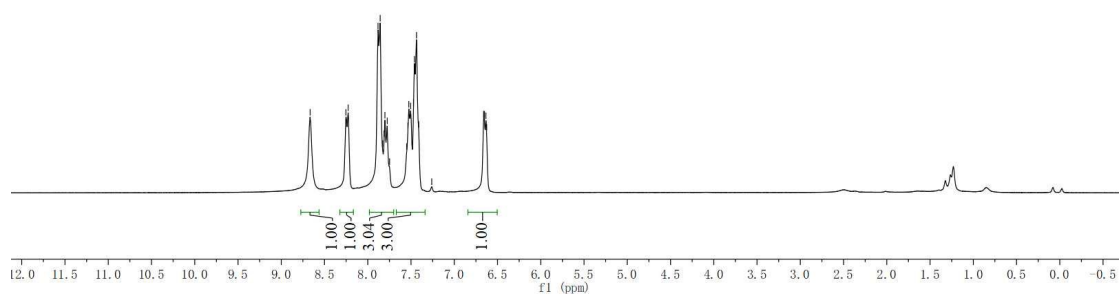

165.8  
163.5  
160.3  
150.0  
149.8  
143.4  
143.3  
133.8  
132.4  
128.8  
127.3  
110.7  
110.6  
104.7  
104.2  
77.6  
77.2  
76.7

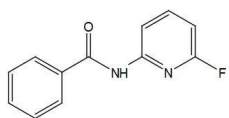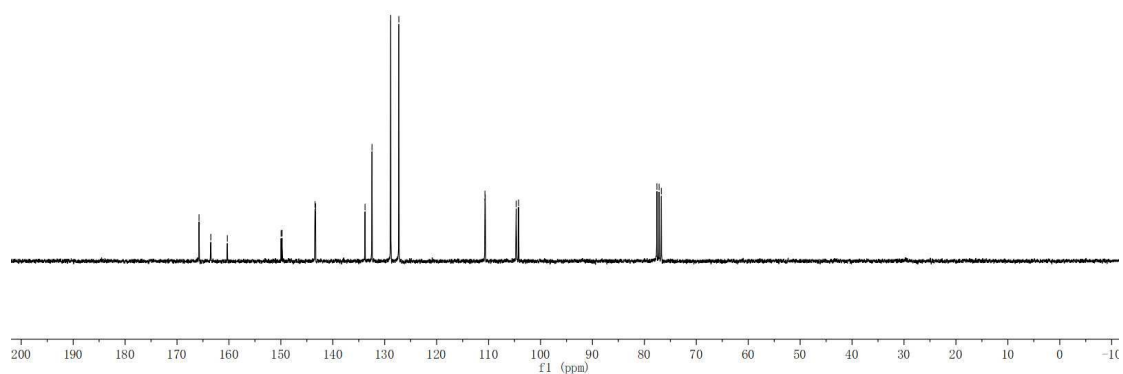

### 3-Bromo-2-phenylimidazo[1,2-a]pyridine (4aa)

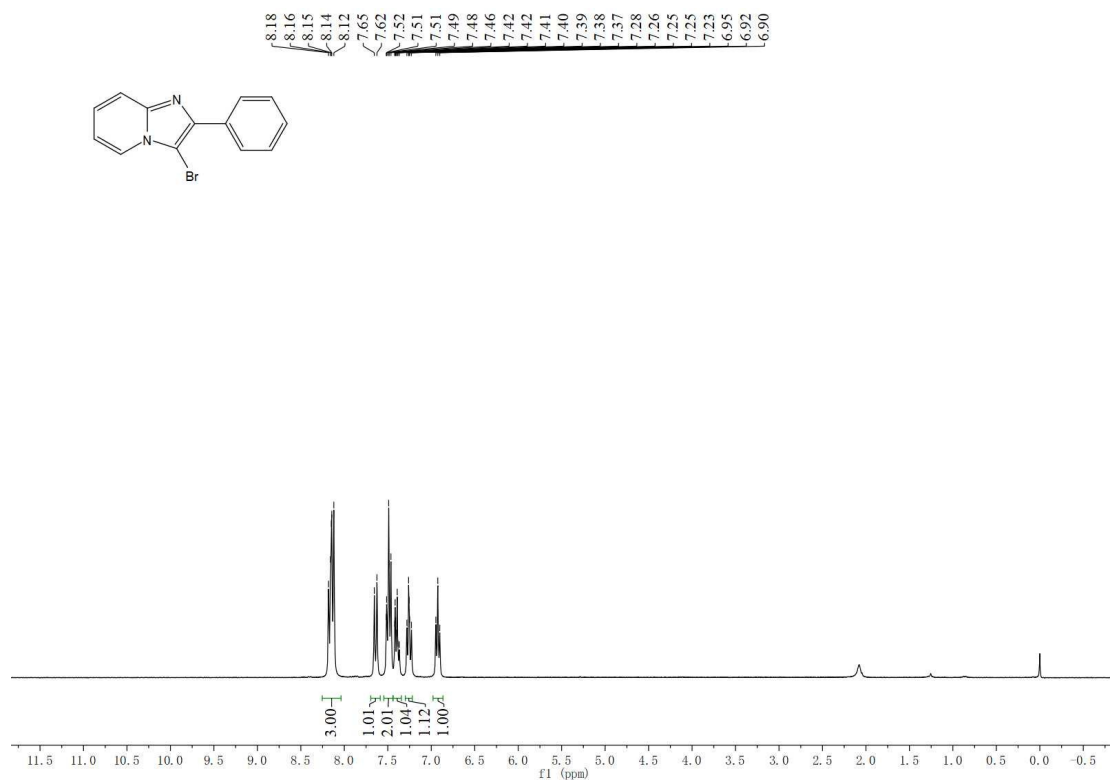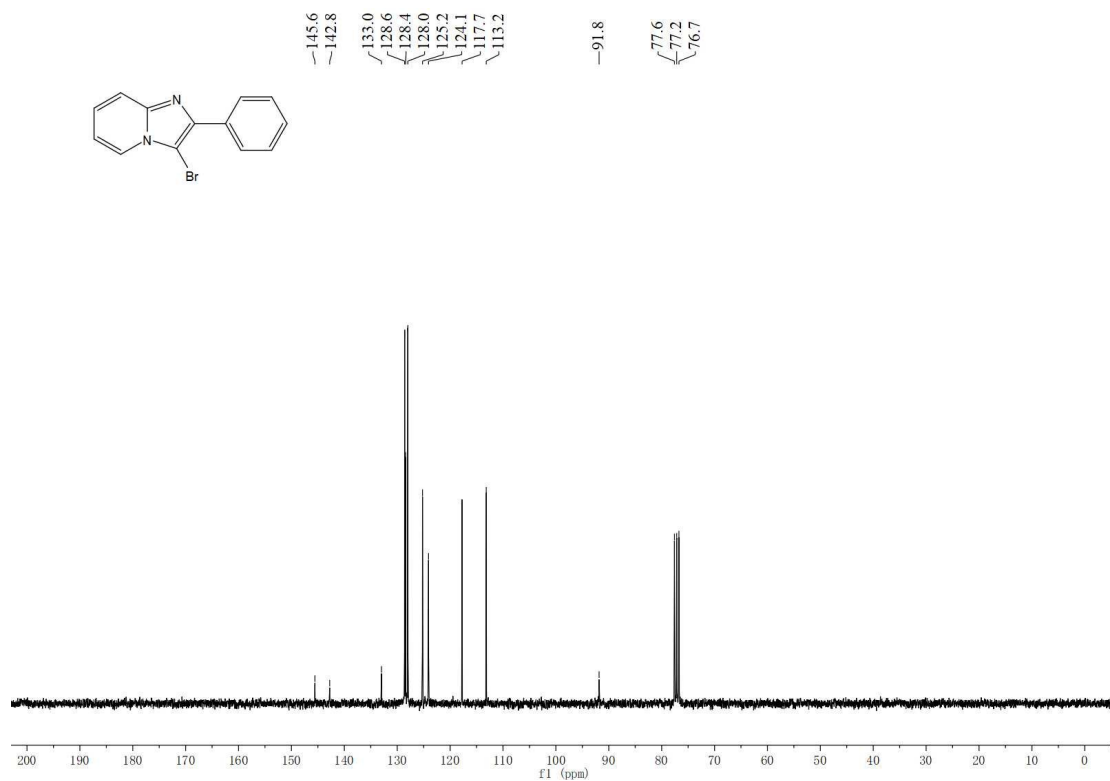

### 3-Bromo-2-(p-tolyl)imidazo[1,2-a]pyridine (4ba)

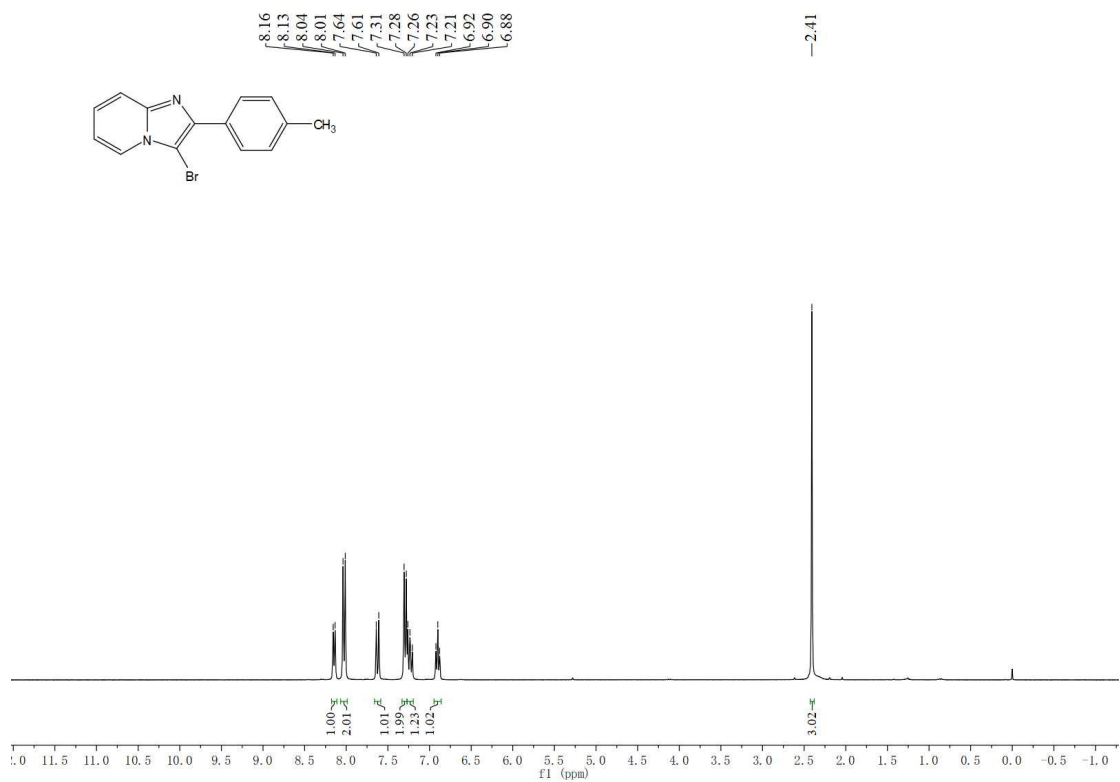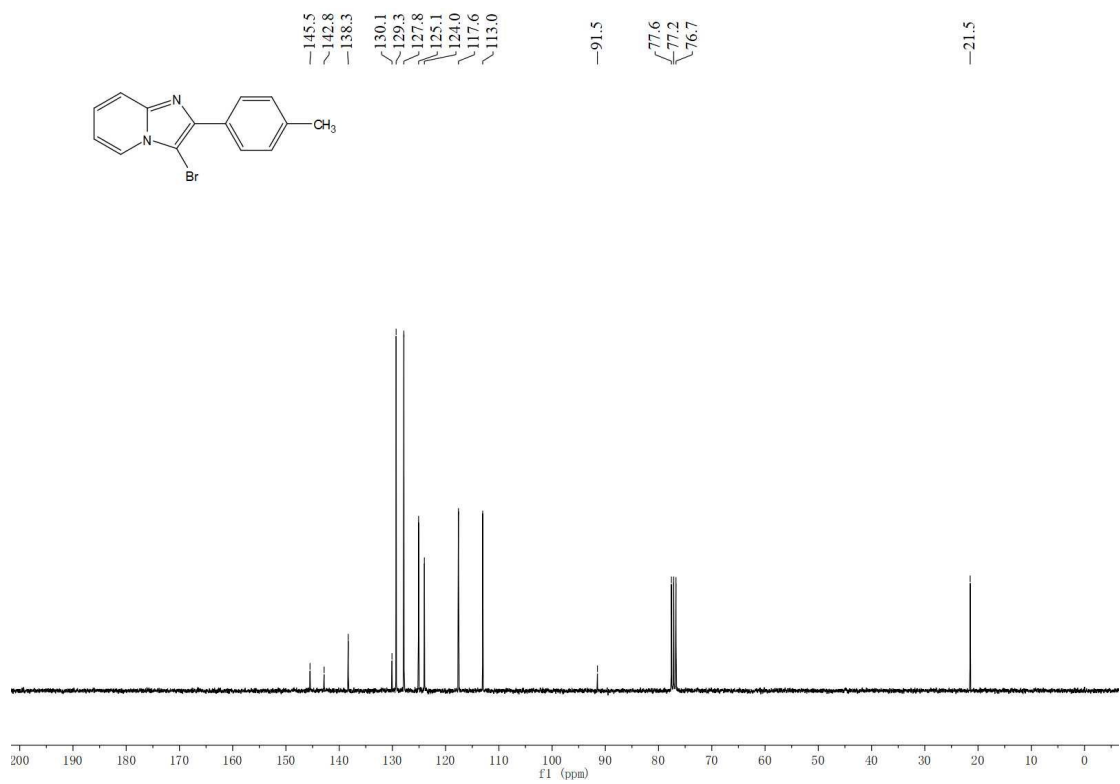

### 3-Bromo-2-(4-bromophenyl)imidazo[1,2-a]pyridine (4ca)

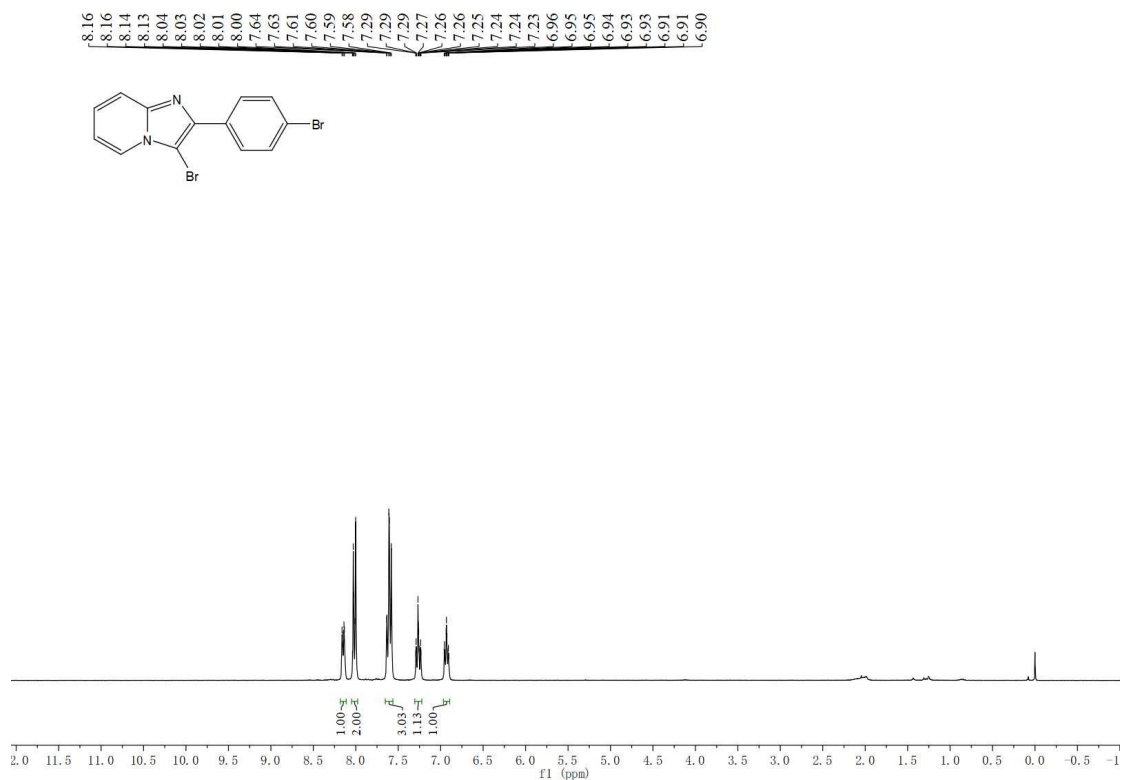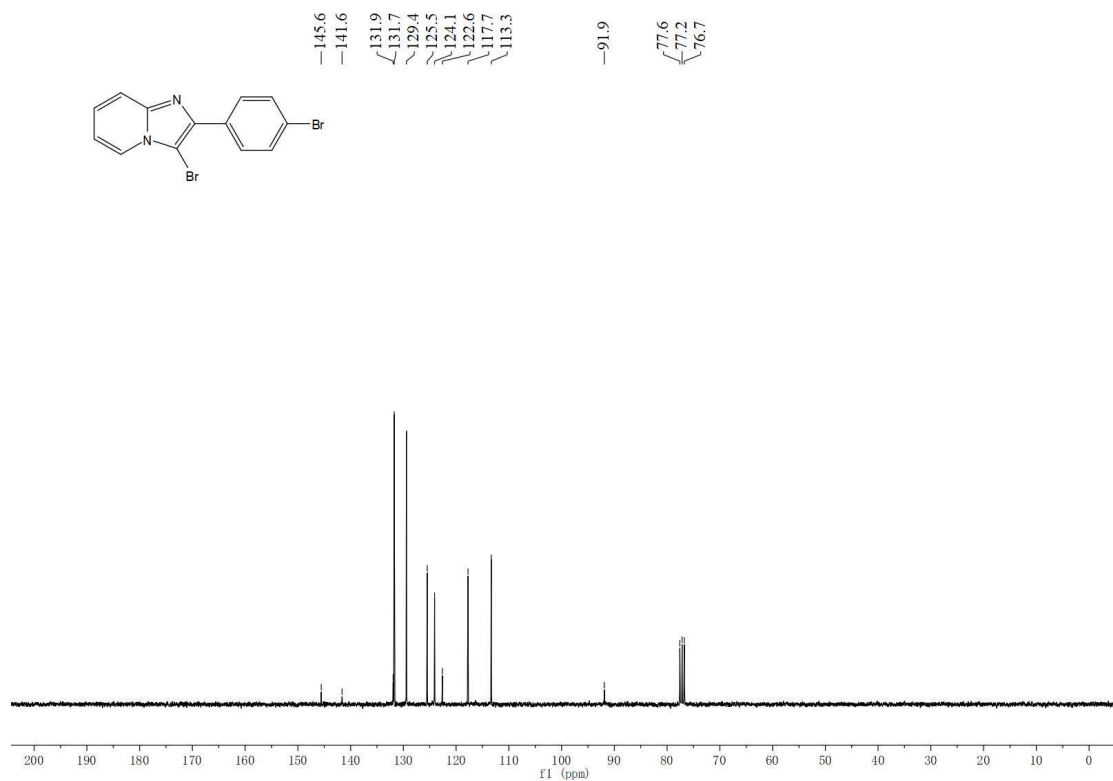

### 3-Bromo-2-(4-chlorophenyl)imidazo[1,2-a]pyridine (4da)

8.18  
8.17  
8.17  
8.16  
8.15  
8.15  
8.14  
8.10  
8.09  
8.09  
8.08  
8.07  
8.06  
8.06  
7.64  
7.64  
7.61  
7.61  
7.47  
7.47  
7.46  
7.45  
7.45  
7.45  
7.45  
7.44  
7.43  
7.43  
7.42  
7.42  
7.30  
7.29  
7.29  
7.28  
7.27  
7.27  
7.26  
7.25  
7.24  
7.24  
6.97  
6.96  
6.94  
6.94  
6.93  
6.92  
6.92  
6.91

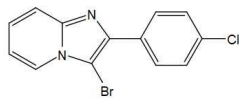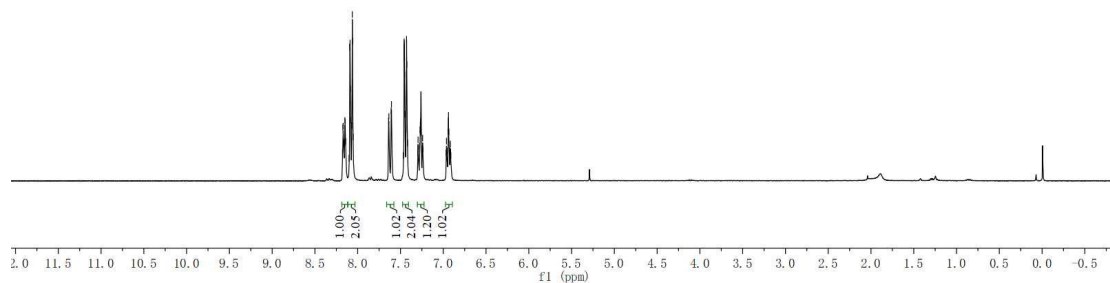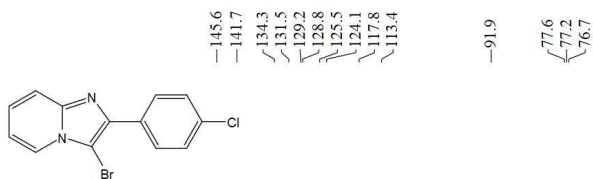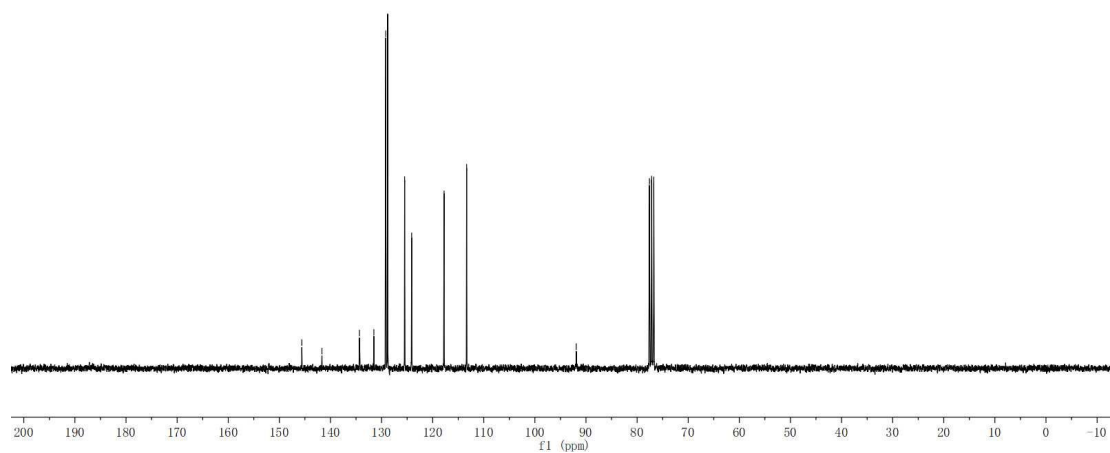

### 3-Bromo-2-(4-fluorophenyl)imidazo[1,2-a]pyridine (4ea)

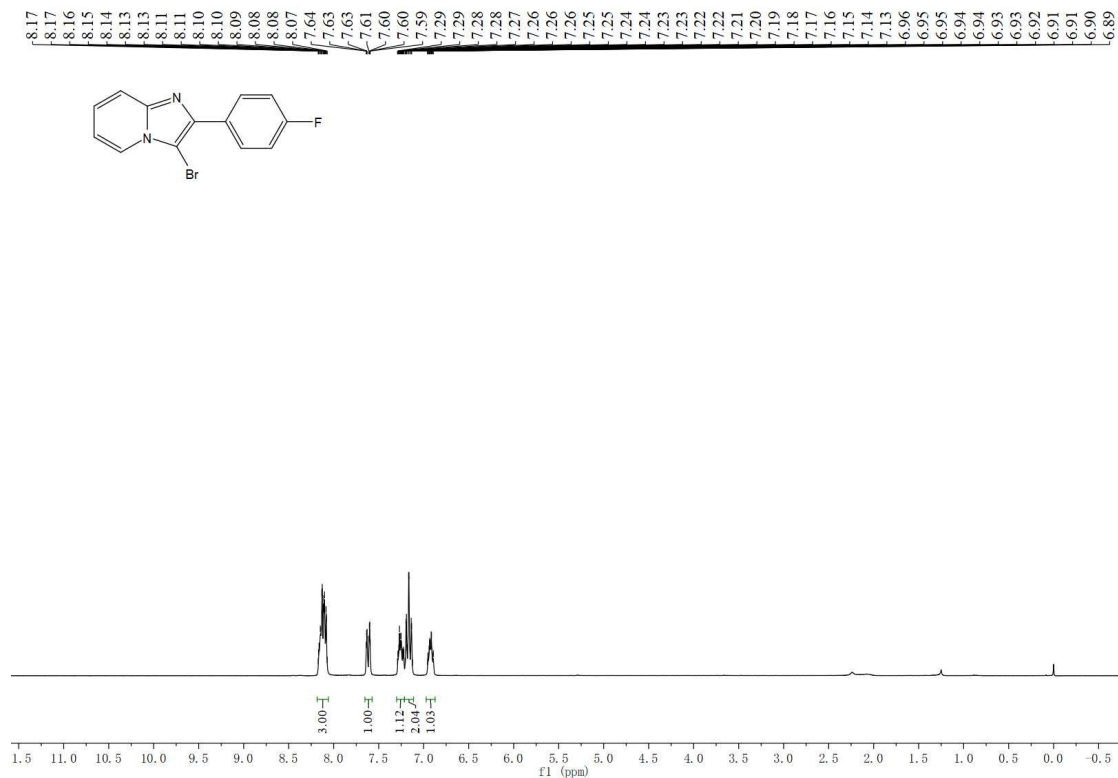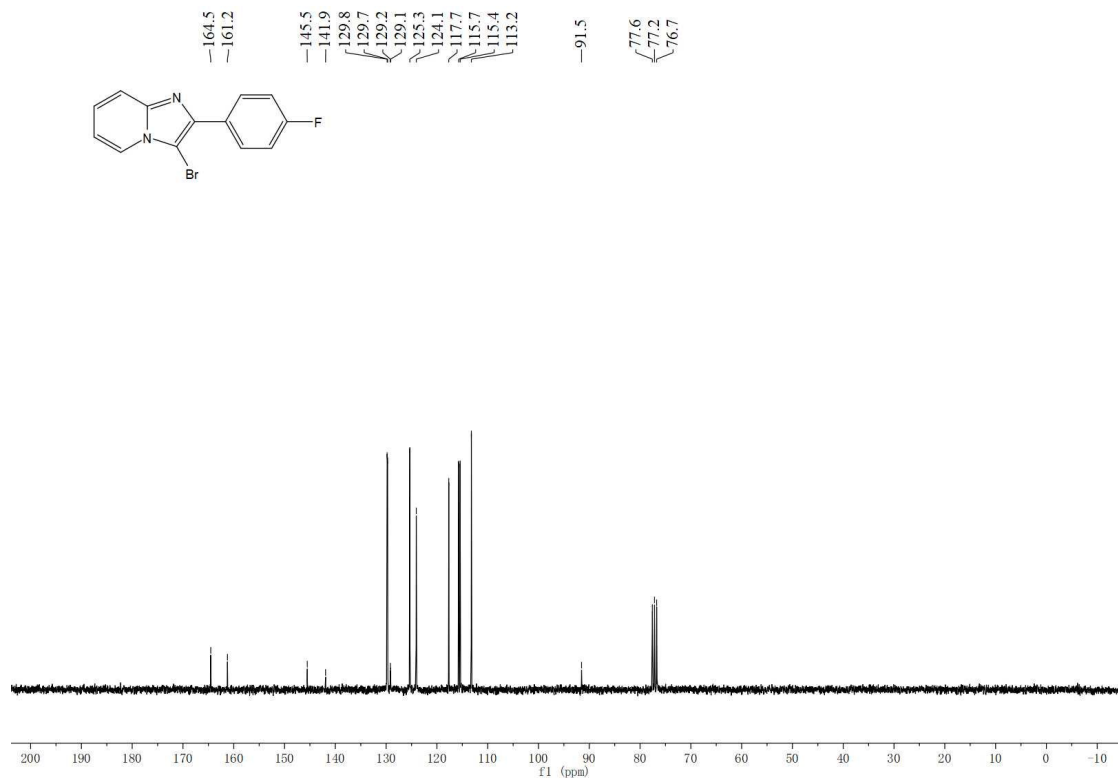

### 3-Bromo-2-(4-(trifluoromethyl)phenyl)imidazo[1,2-a]pyridine (4fa)

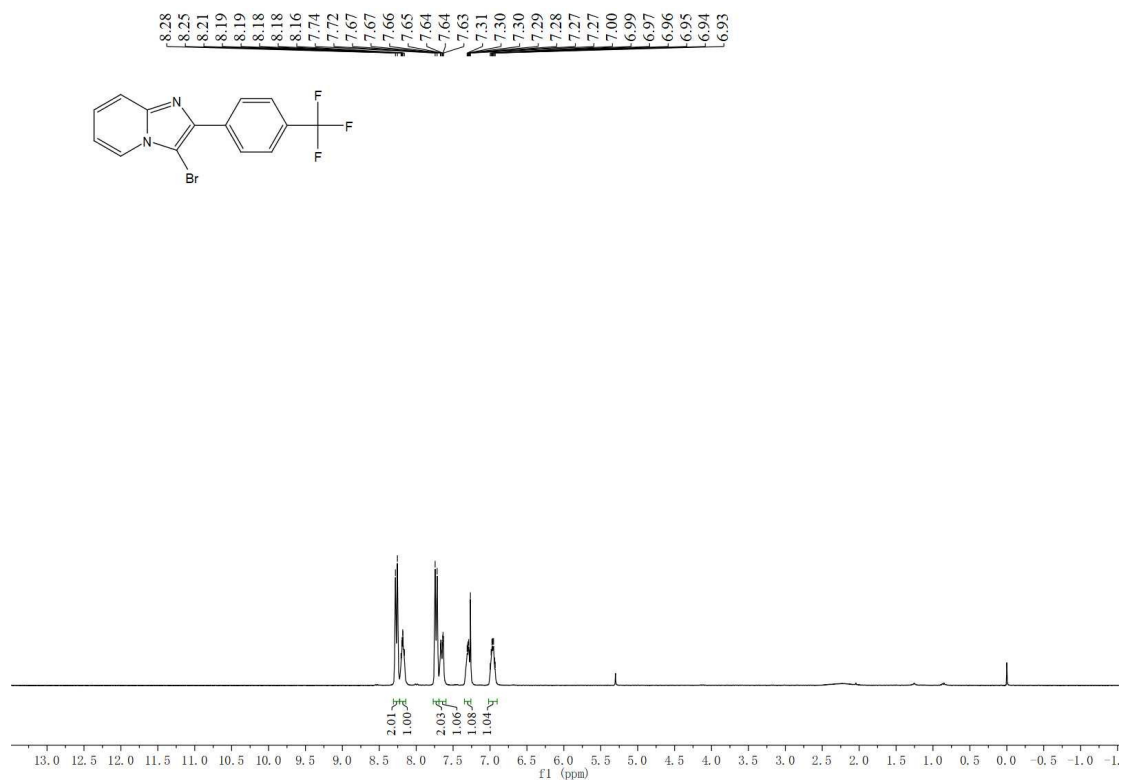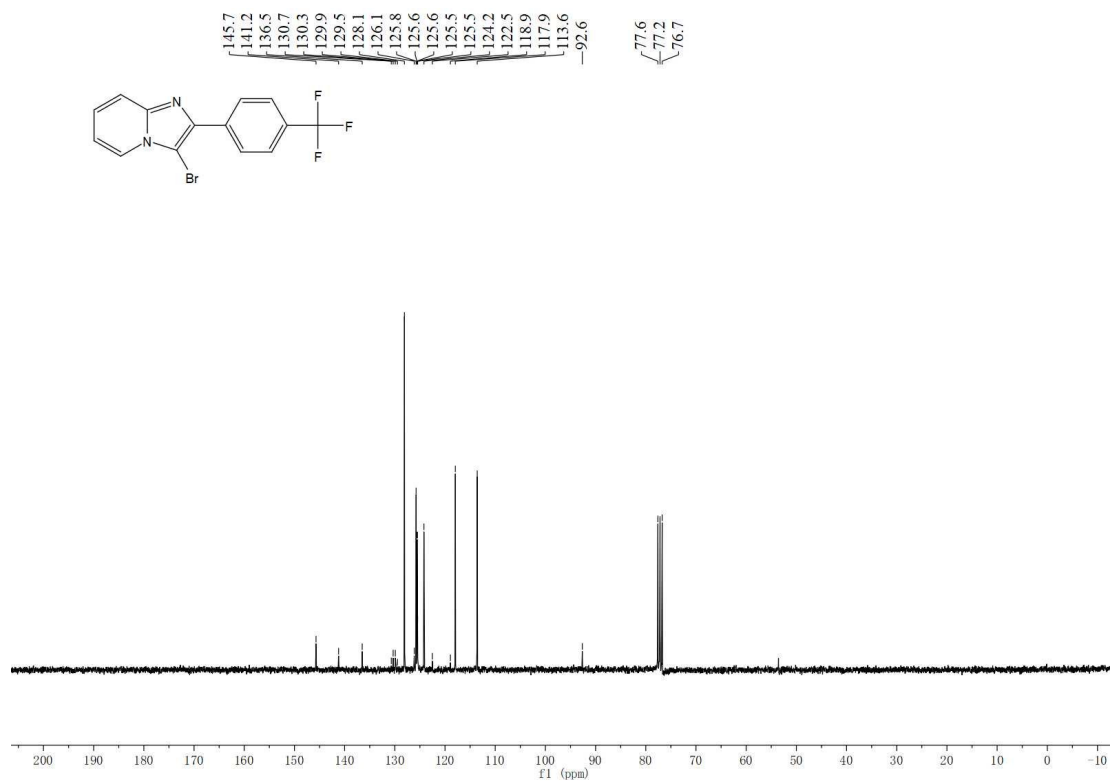



### 3-Bromo-2-(4-methoxyphenyl)imidazo[1,2-a]pyridine (4ga)

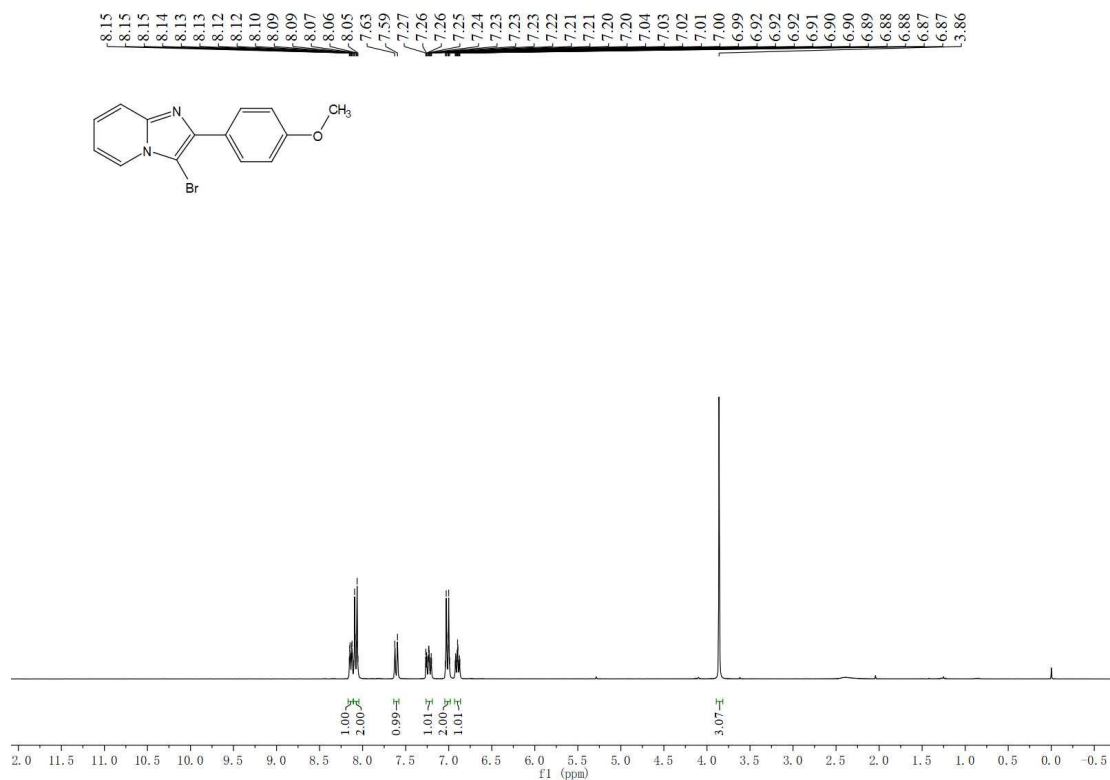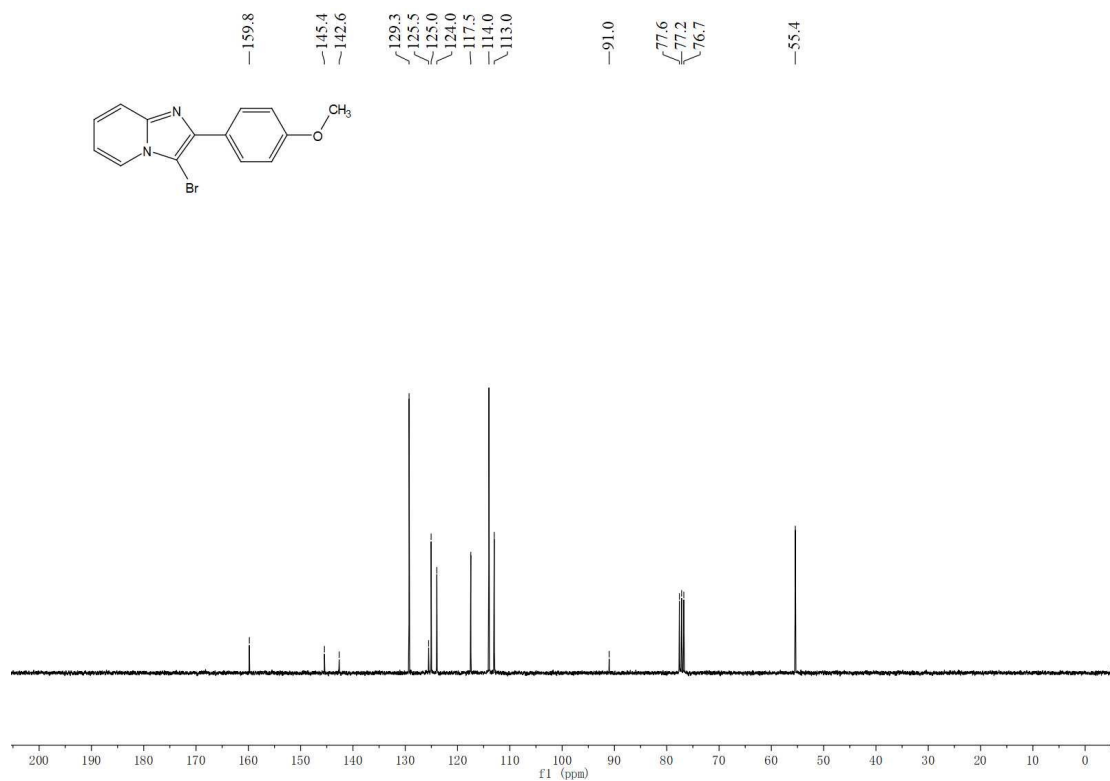

### 3-Bromo-2-(m-tolyl)imidazo[1,2-a]pyridine (4ha)

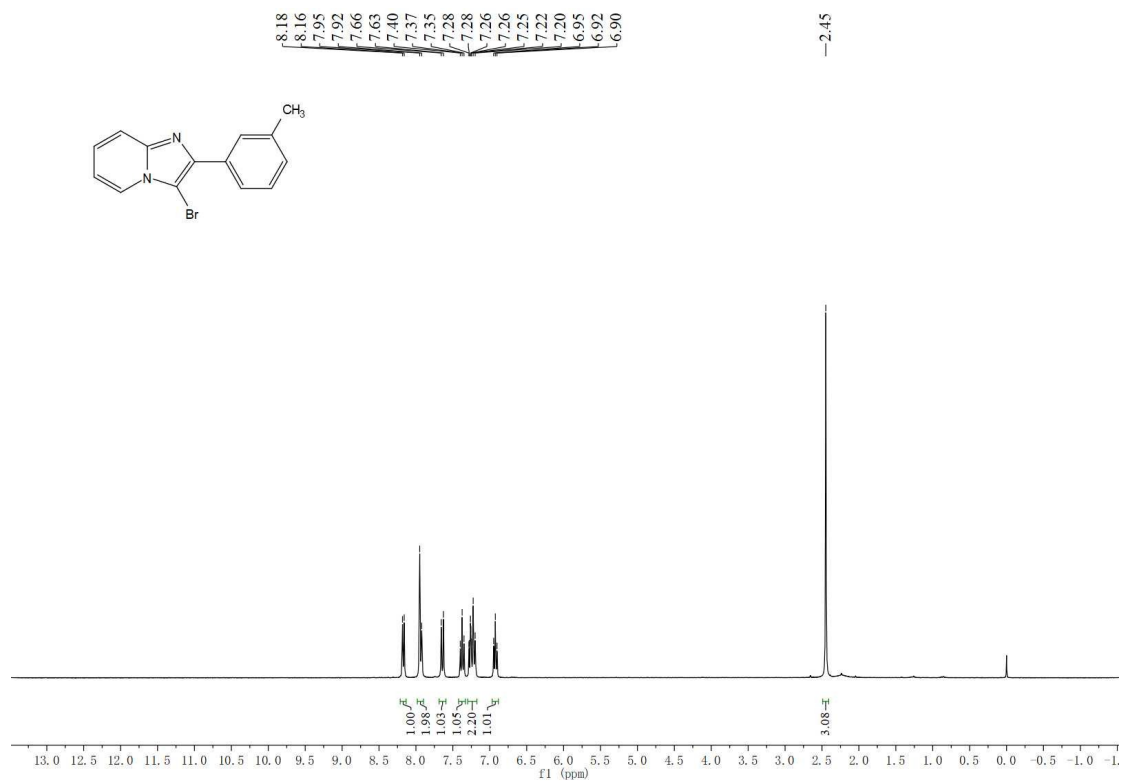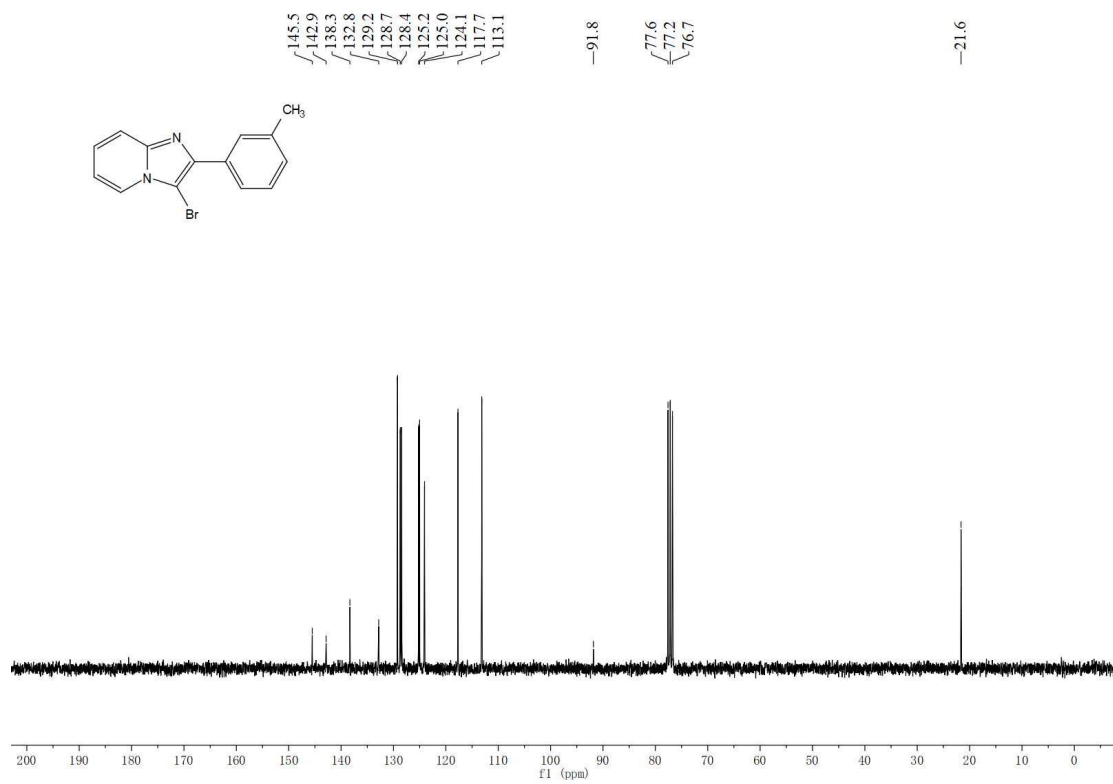

### 3-Bromo-2-(3-bromophenyl)imidazo[1,2-a]pyridine (4ia)

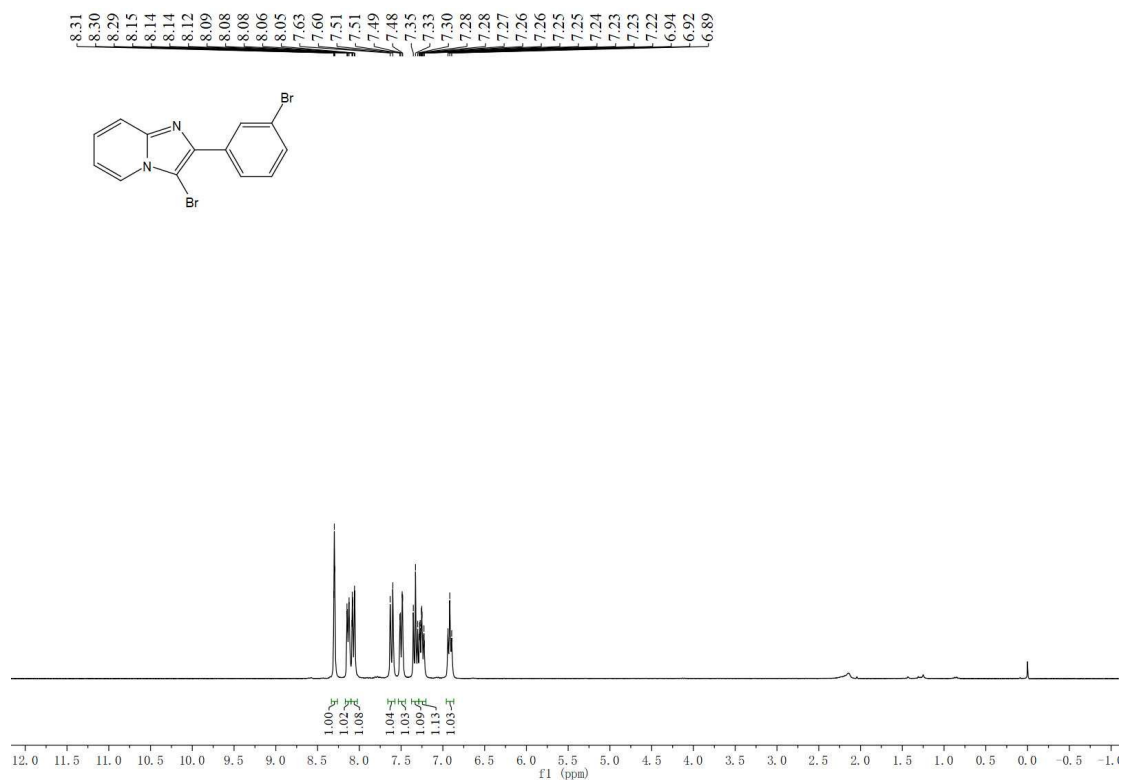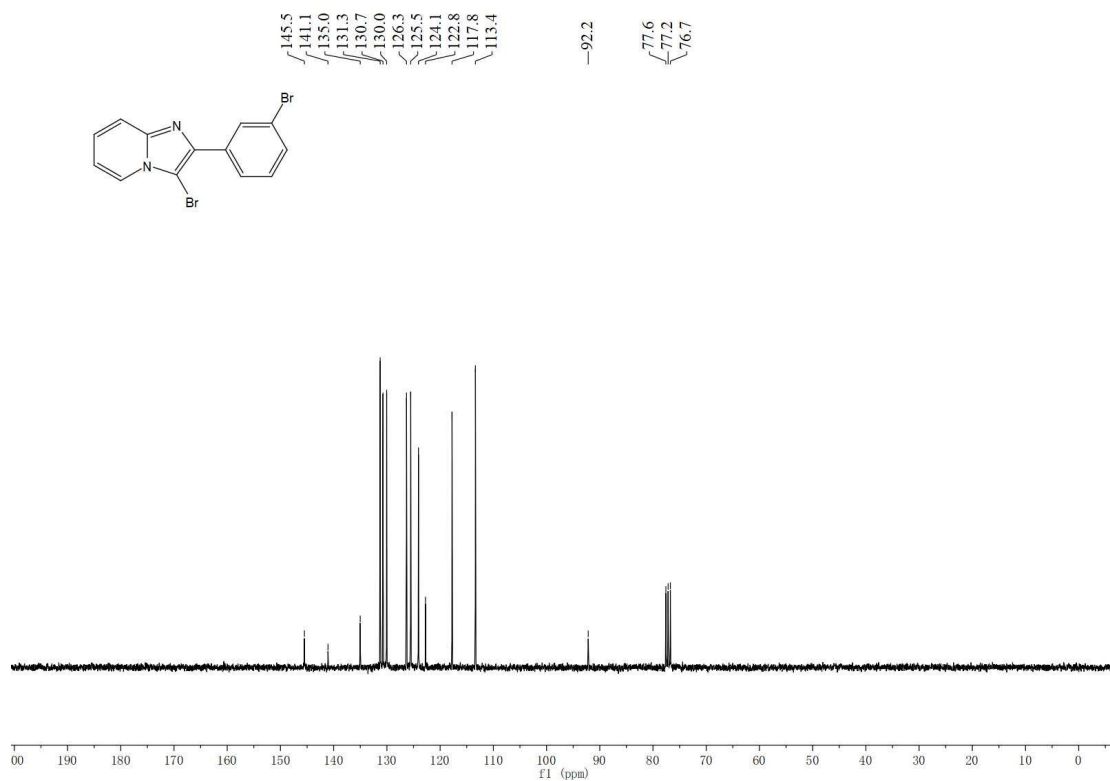

### 3-Bromo-2-(3-methoxyphenyl)imidazo[1,2-a]pyridine (4ja)

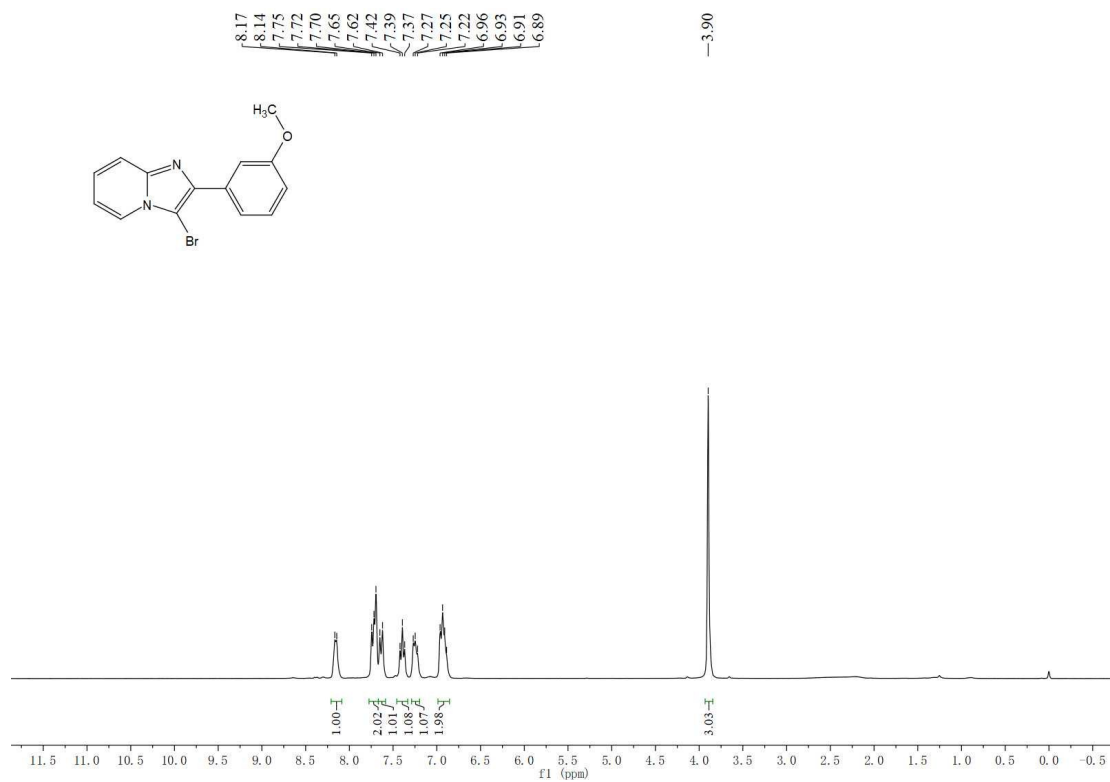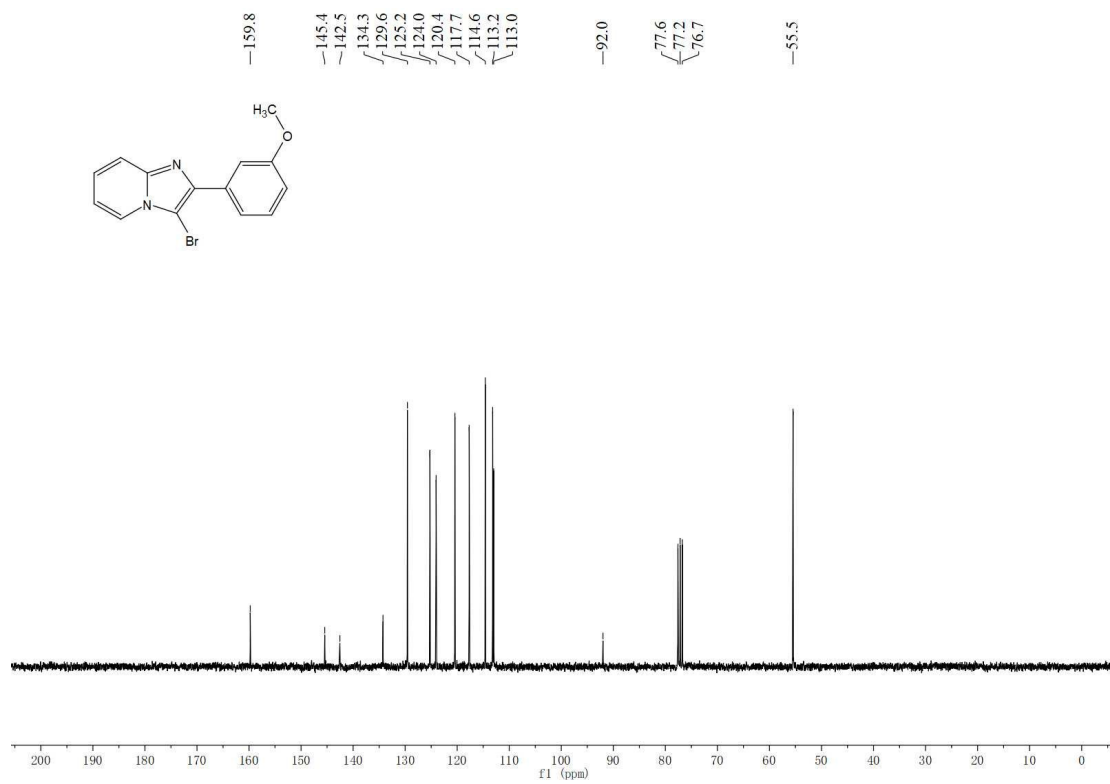

### 3-Bromo-2-(o-tolyl)imidazo[1,2-a]pyridin (4ka)

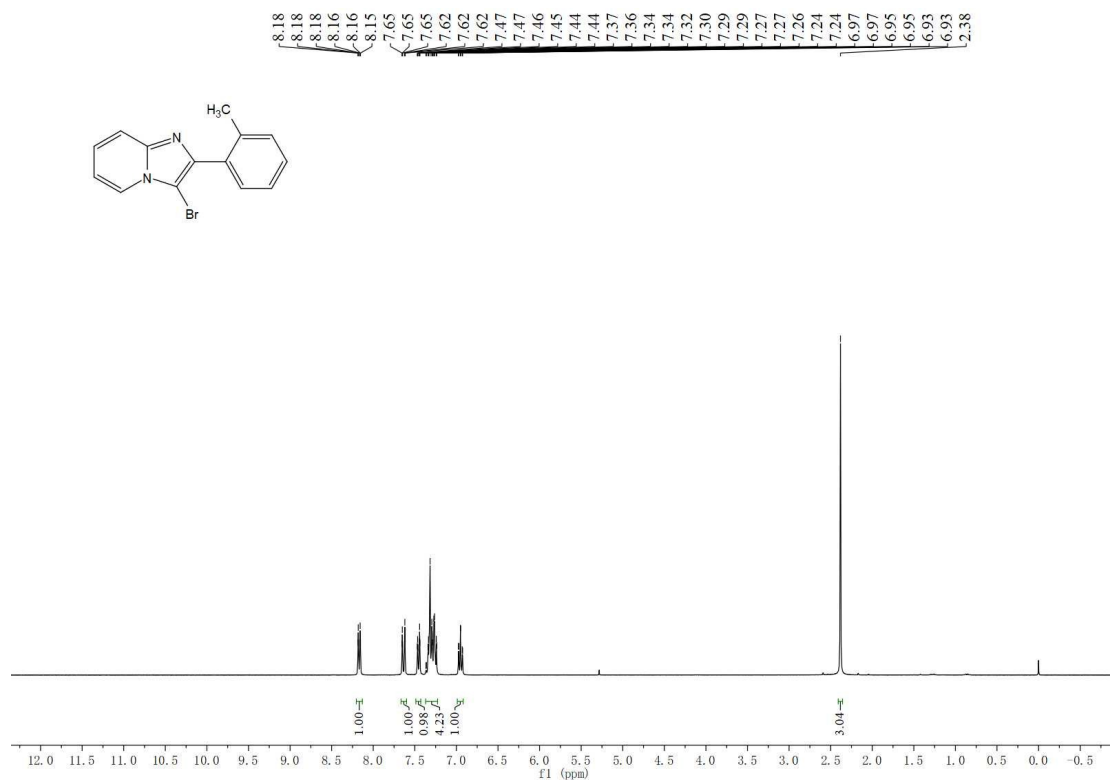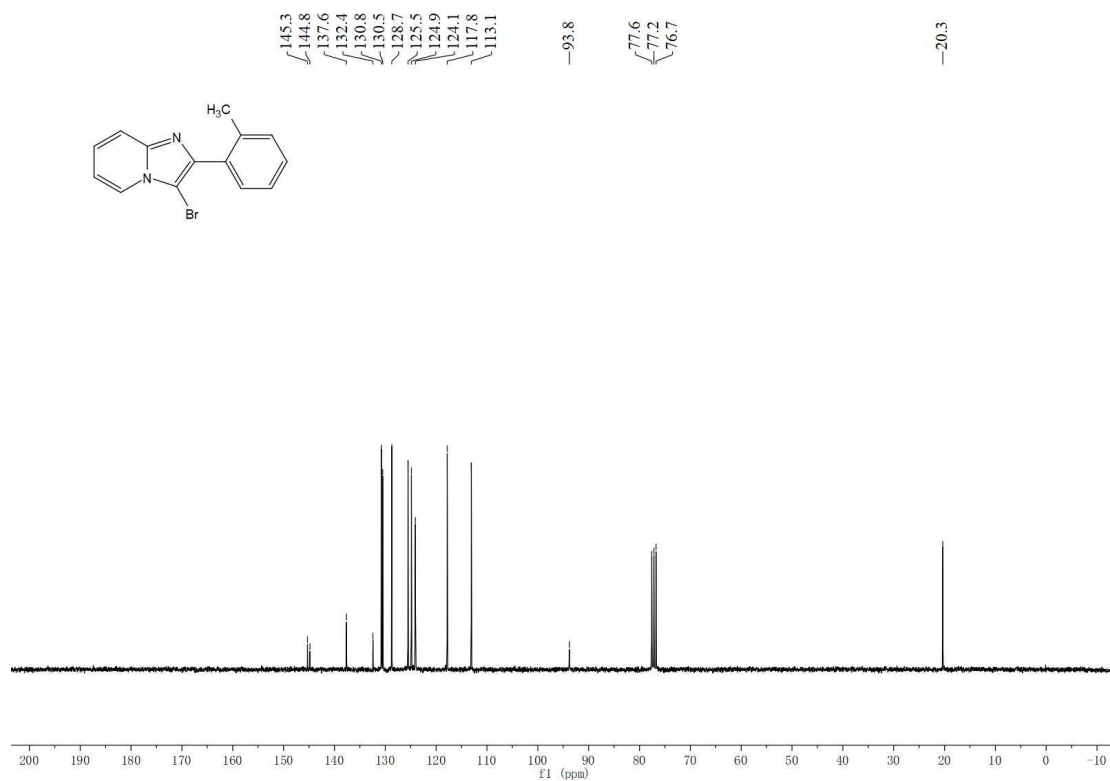

### 3-Bromo-2-(2-bromophenyl)imidazo[1,2-a]pyridine (4la)

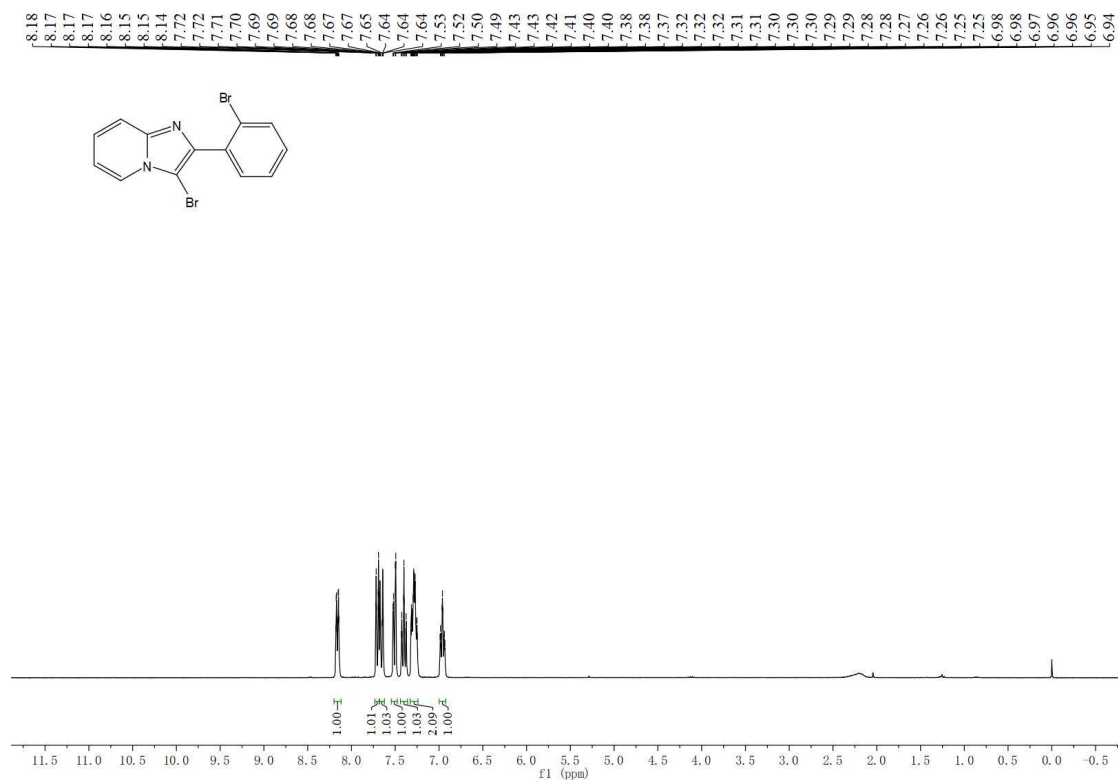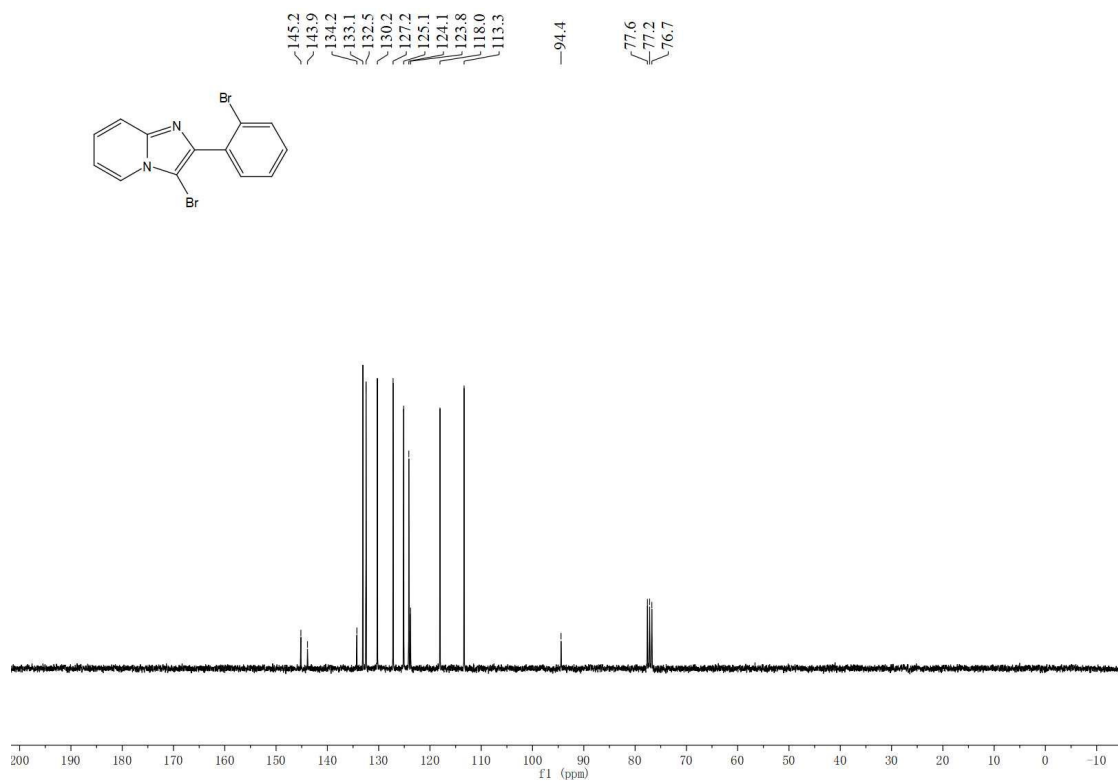

### 3-Bromo-2-(2-methoxyphenyl)imidazo[1,2-a]pyridine (4ma)

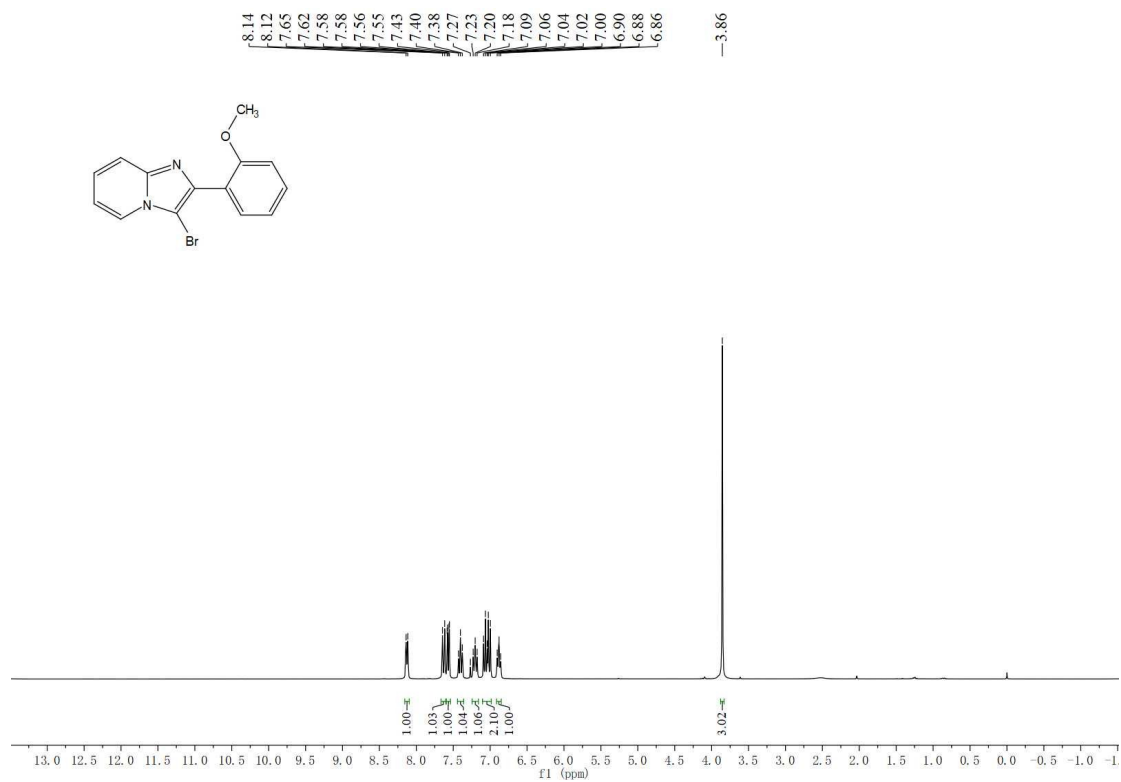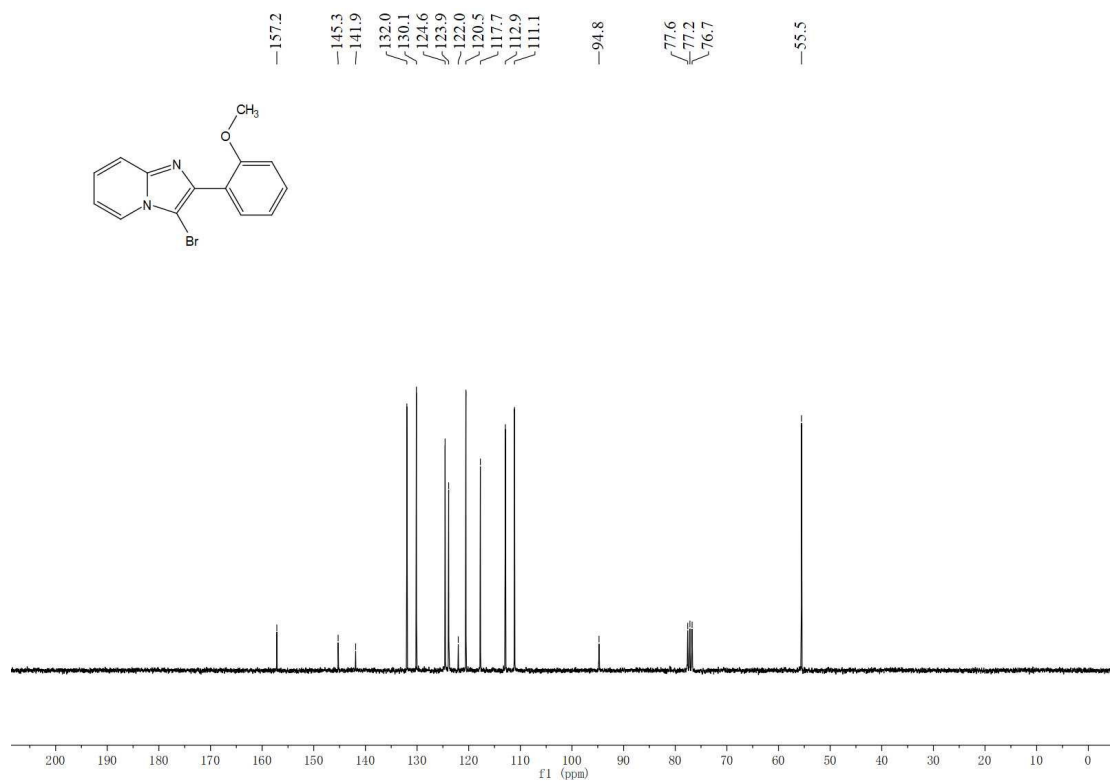

### 3-Bromo-2-(2,4-dichlorophenyl)imidazo[1,2-a]pyridine (4na)

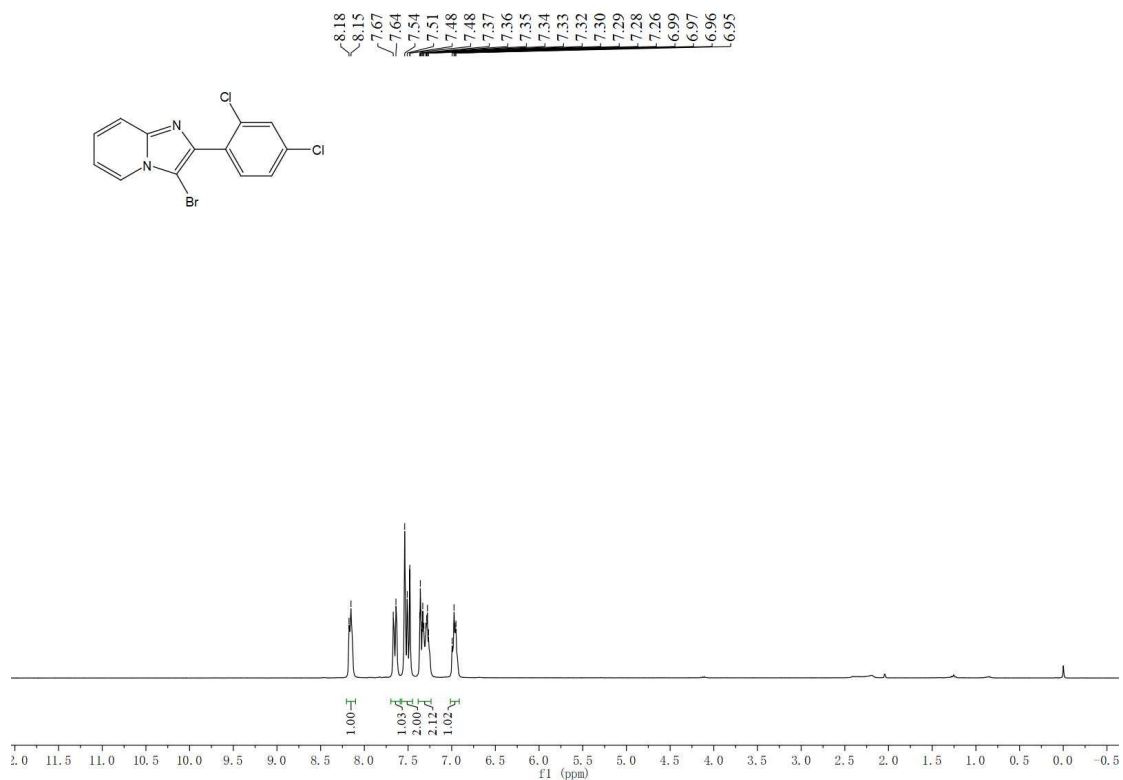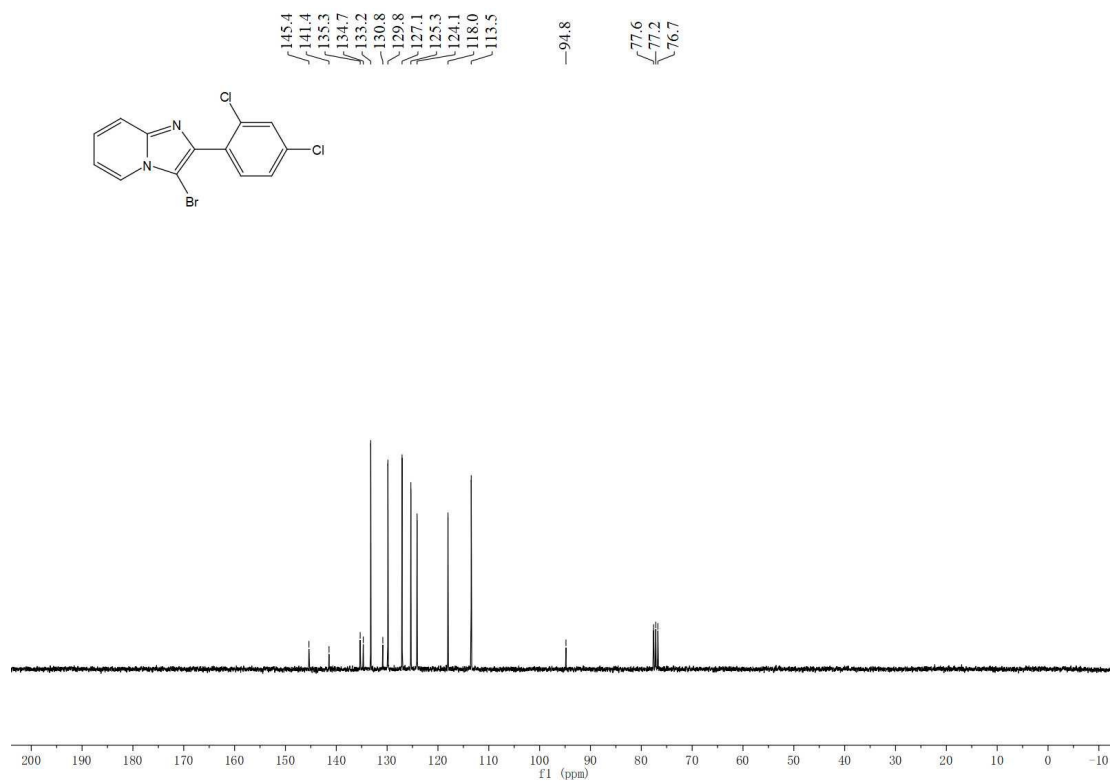



### 3-Bromo-2-(2,4-dichloro-5-fluorophenyl)imidazo[1,2-a]pyridine (40a)

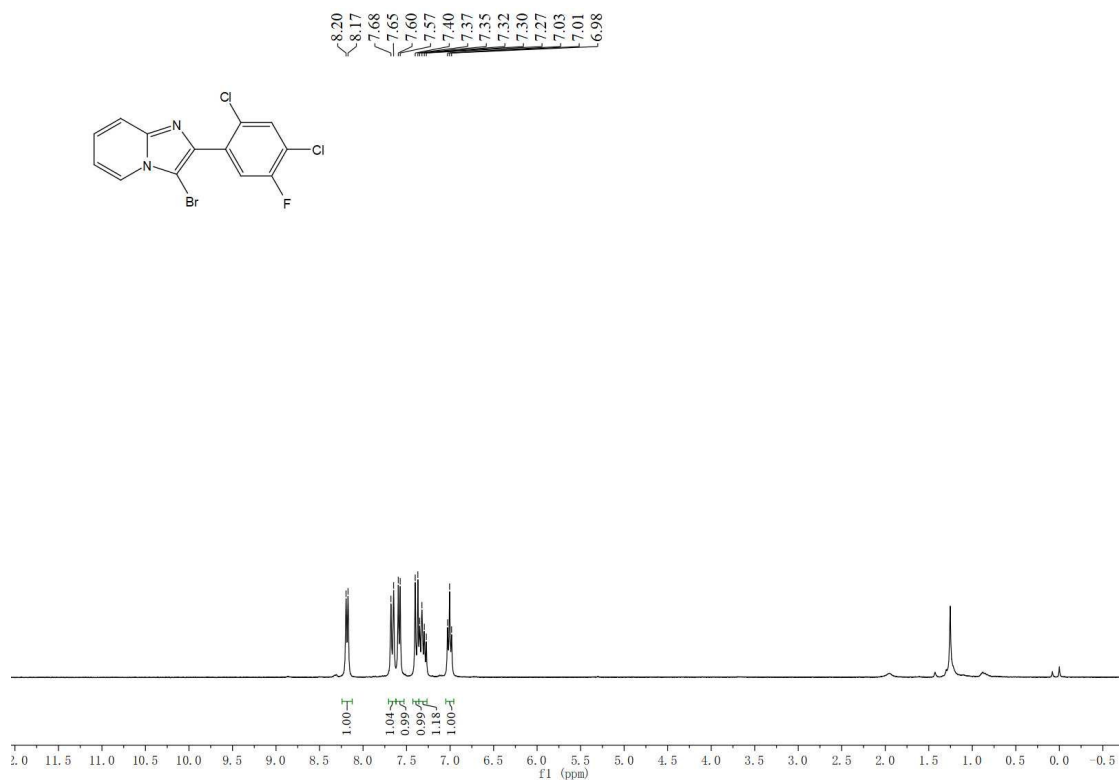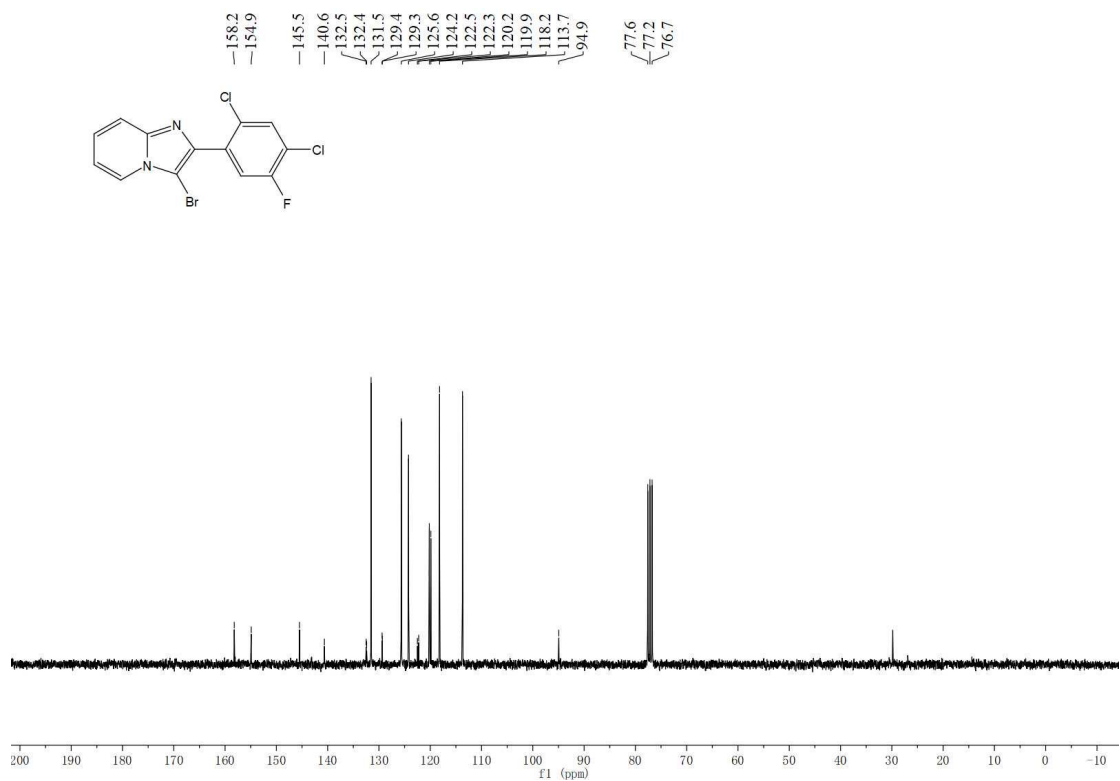

### 3-Bromo-2-(thiophen-2-yl)imidazo[1,2-a]pyridine (4pa)

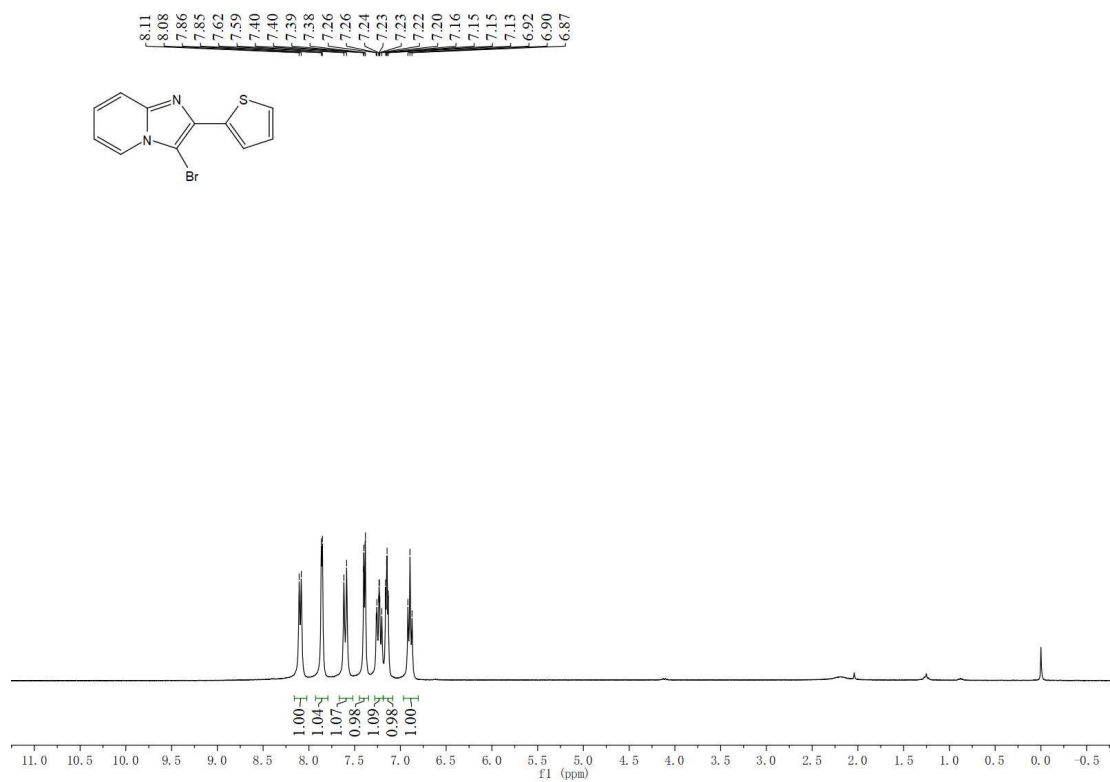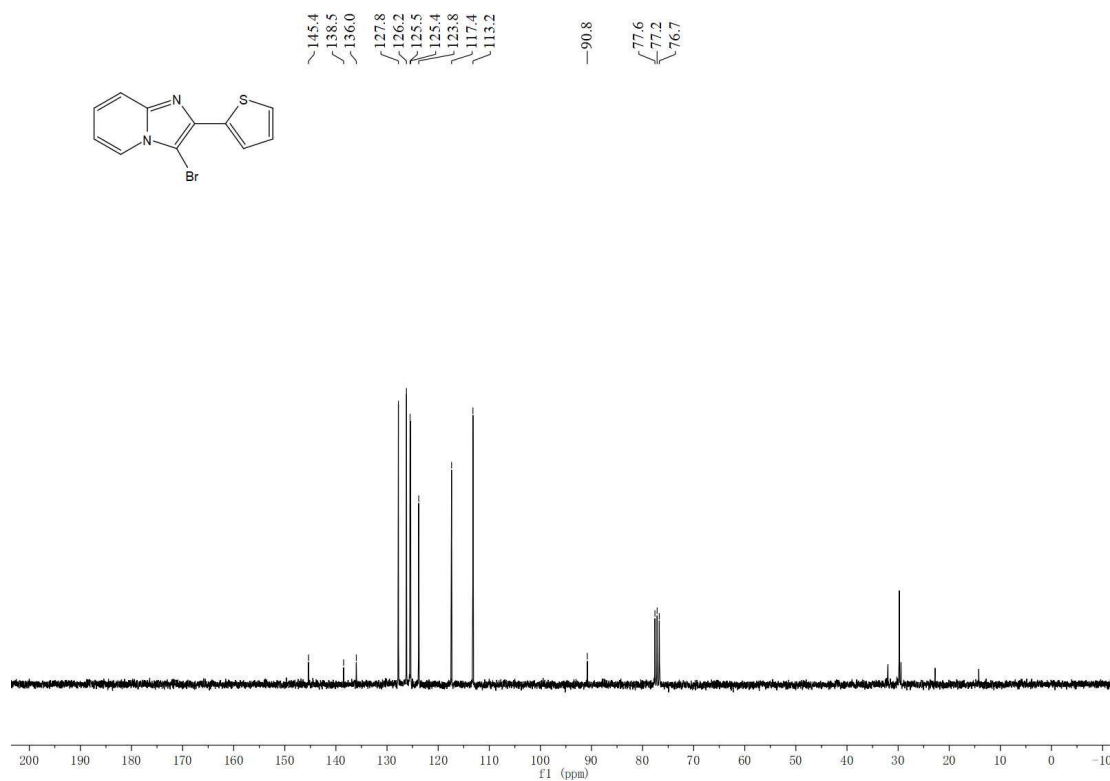

### 3-Bromo-2-methylimidazo[1,2-a]pyridine (4qa)

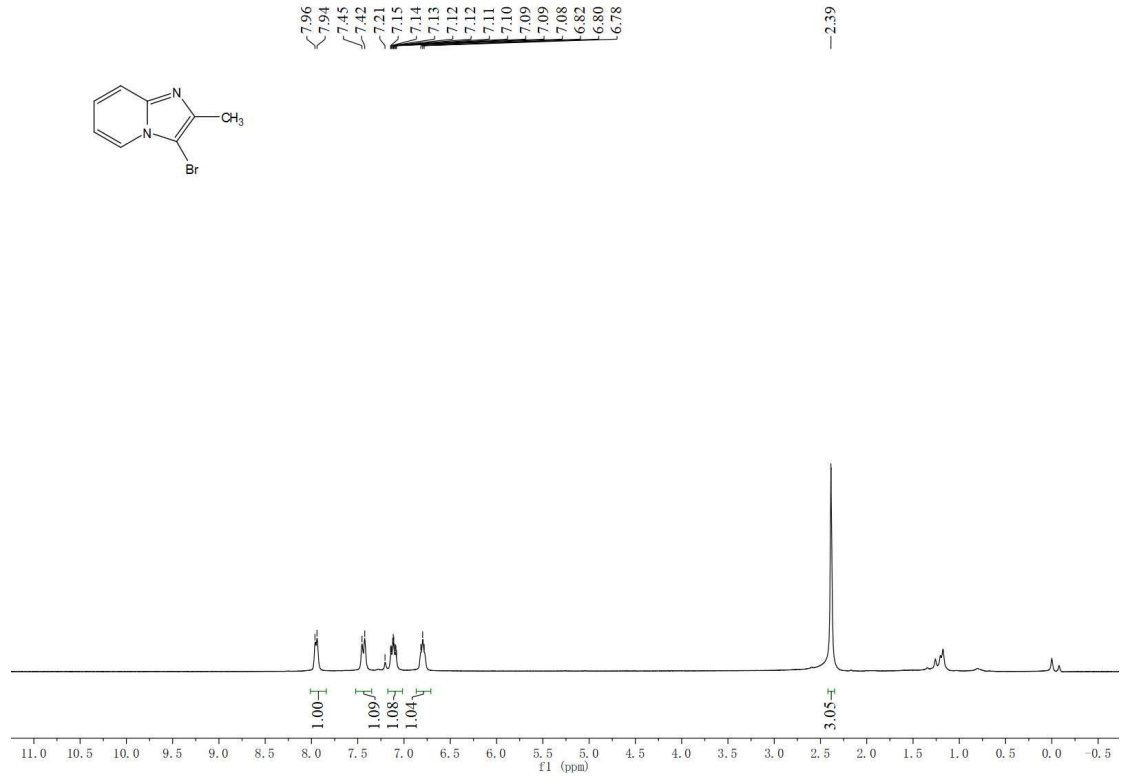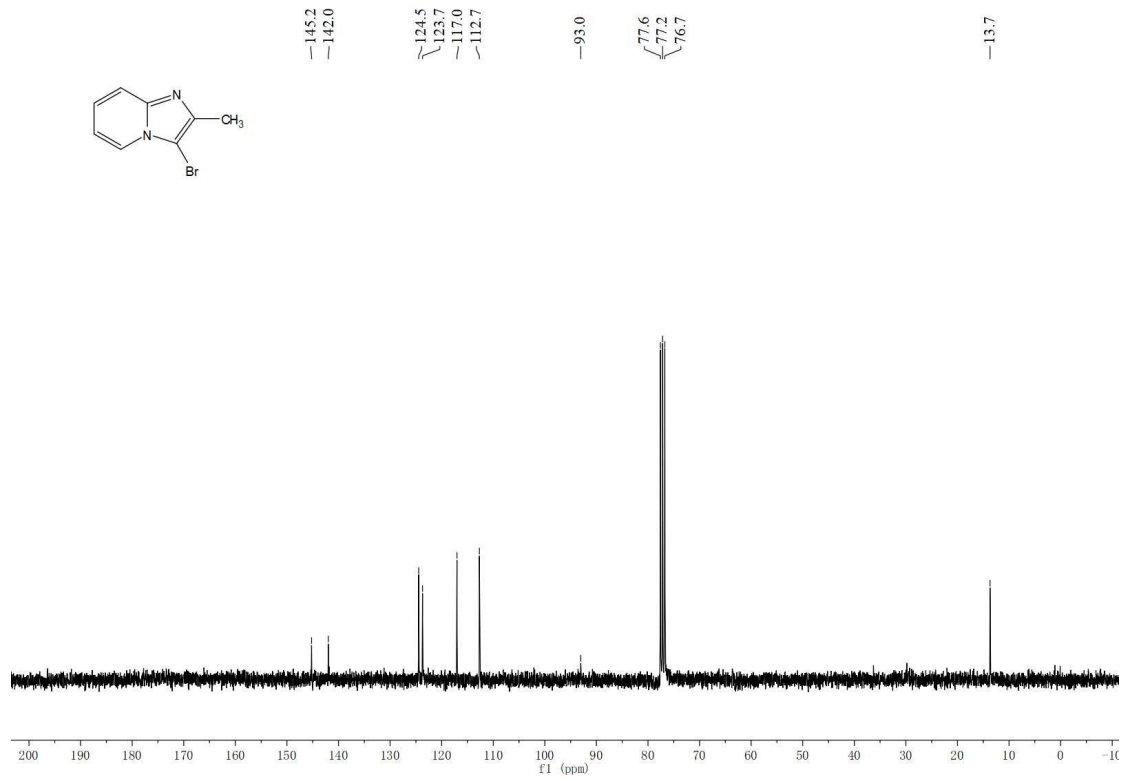

# Ethyl 3-bromoimidazo[1,2-a]pyridine-2-carboxylate (4ra)

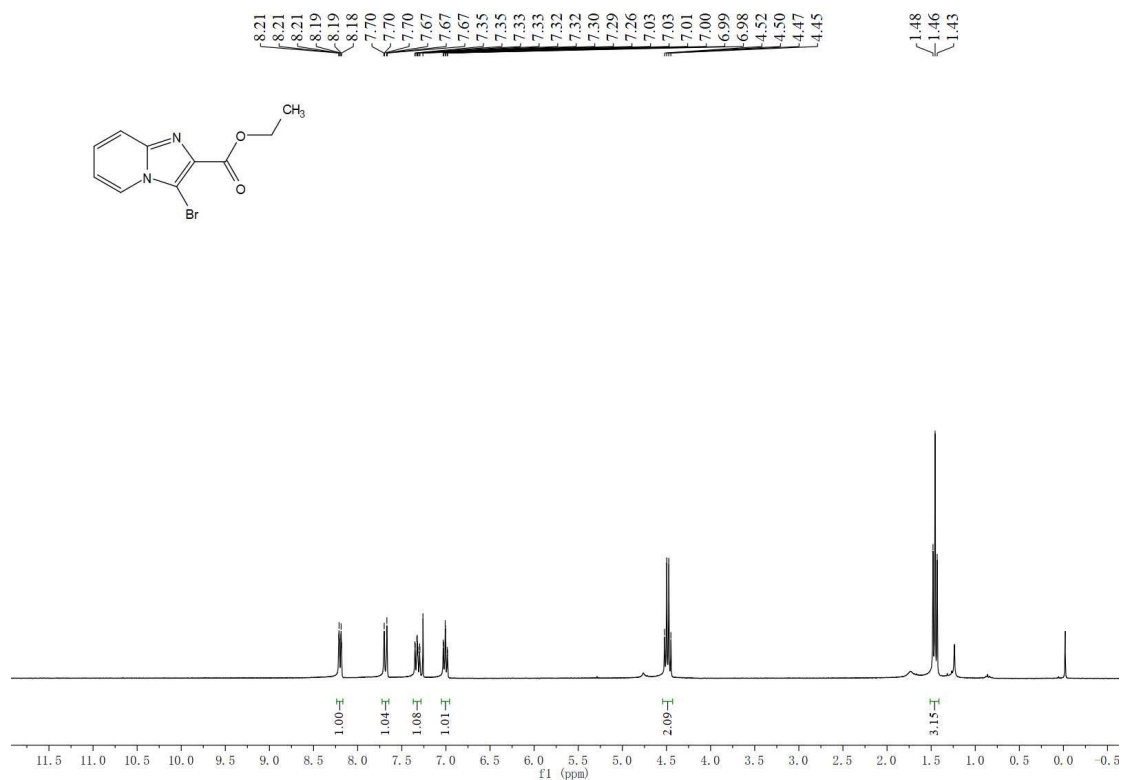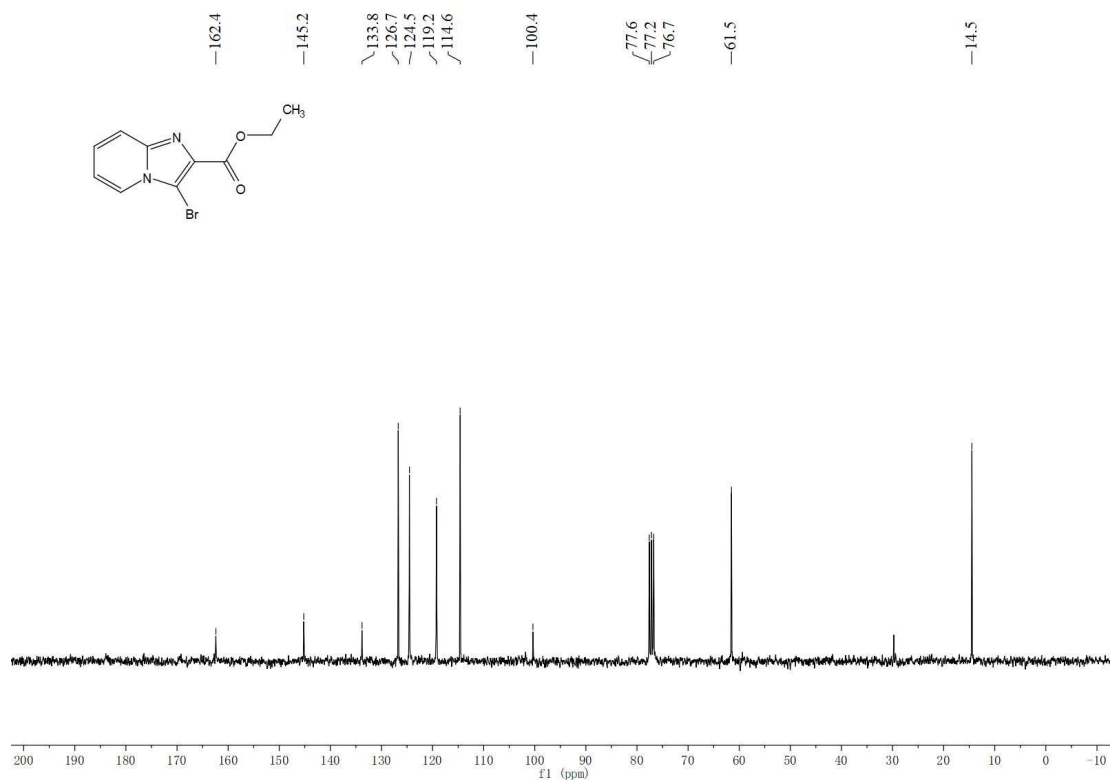

### 3-Bromo-8-methyl-2-phenylimidazo[1,2-a]pyridine (4ab)

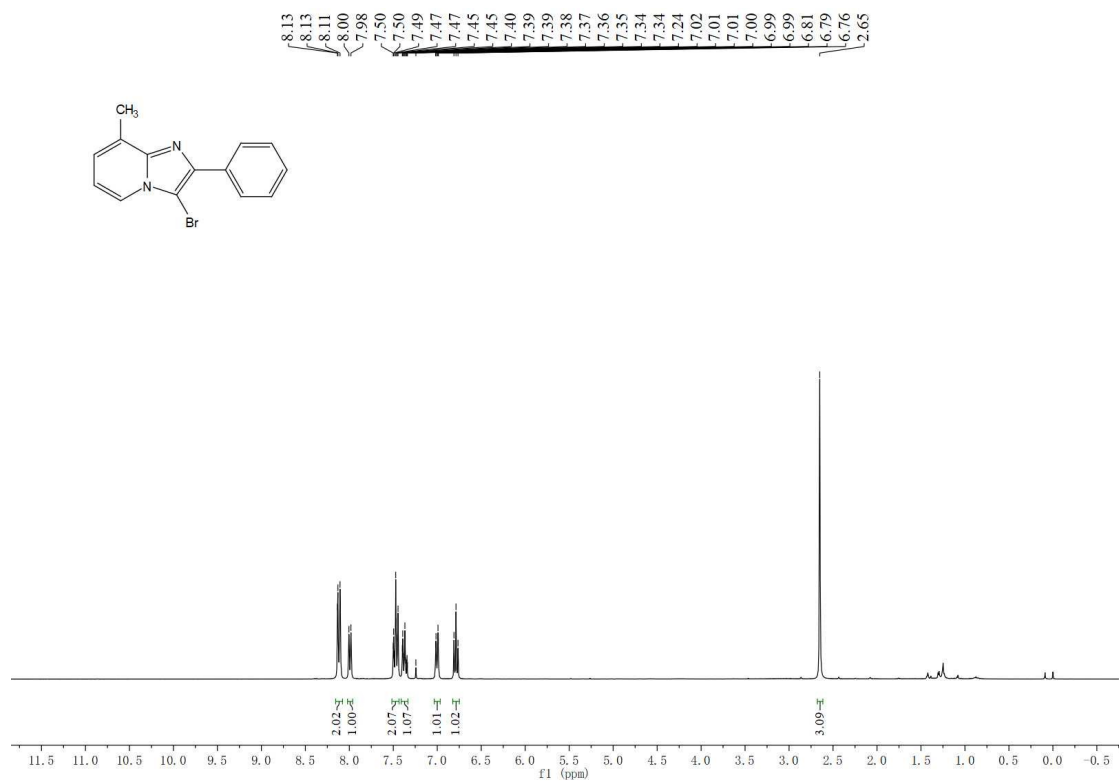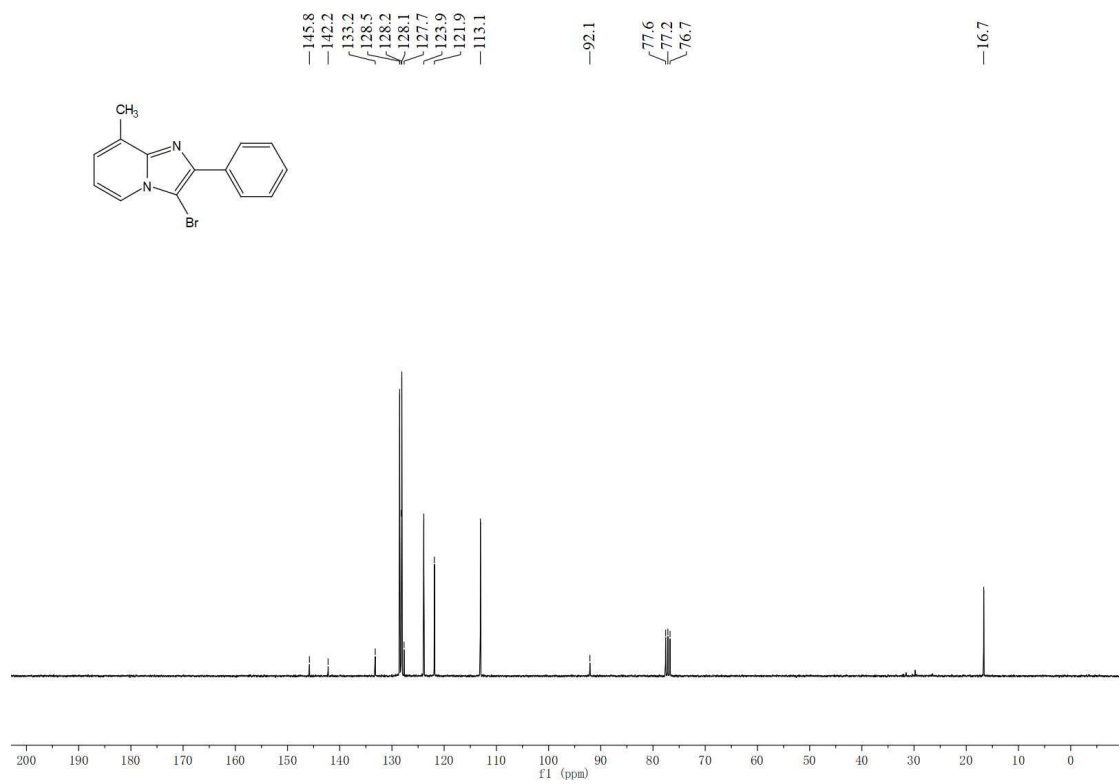

### 3-Bromo-7-methyl-2-phenylimidazo[1,2-a]pyridine (4ac)

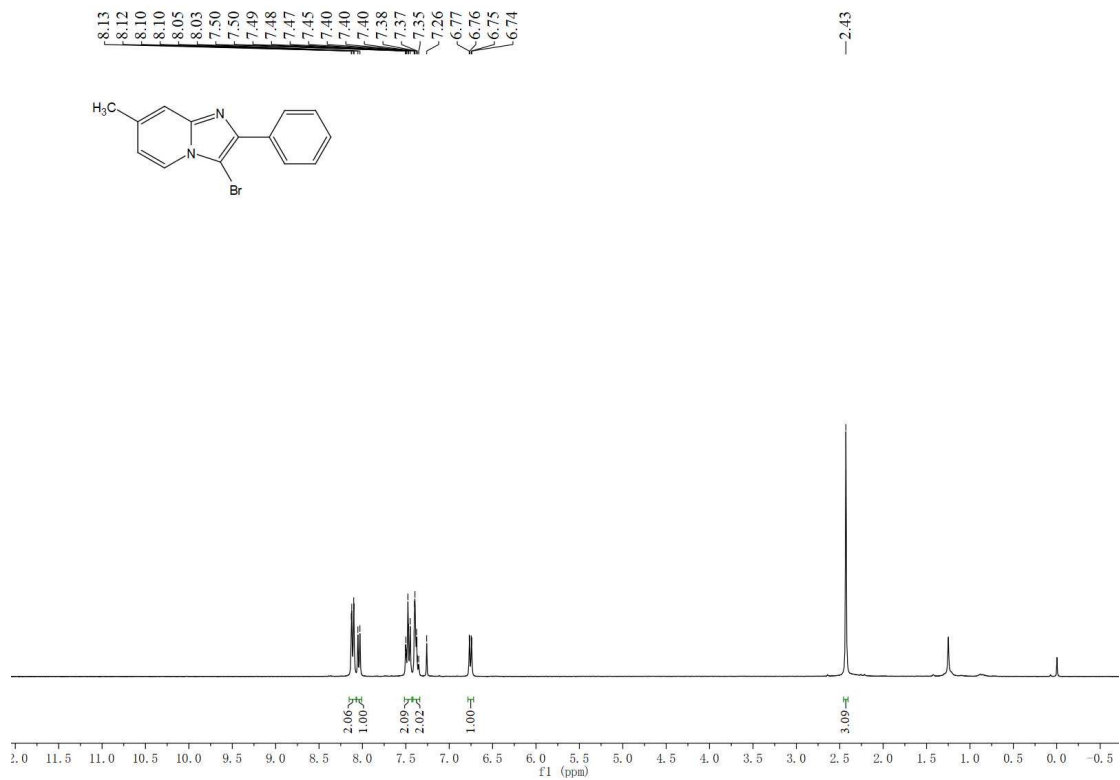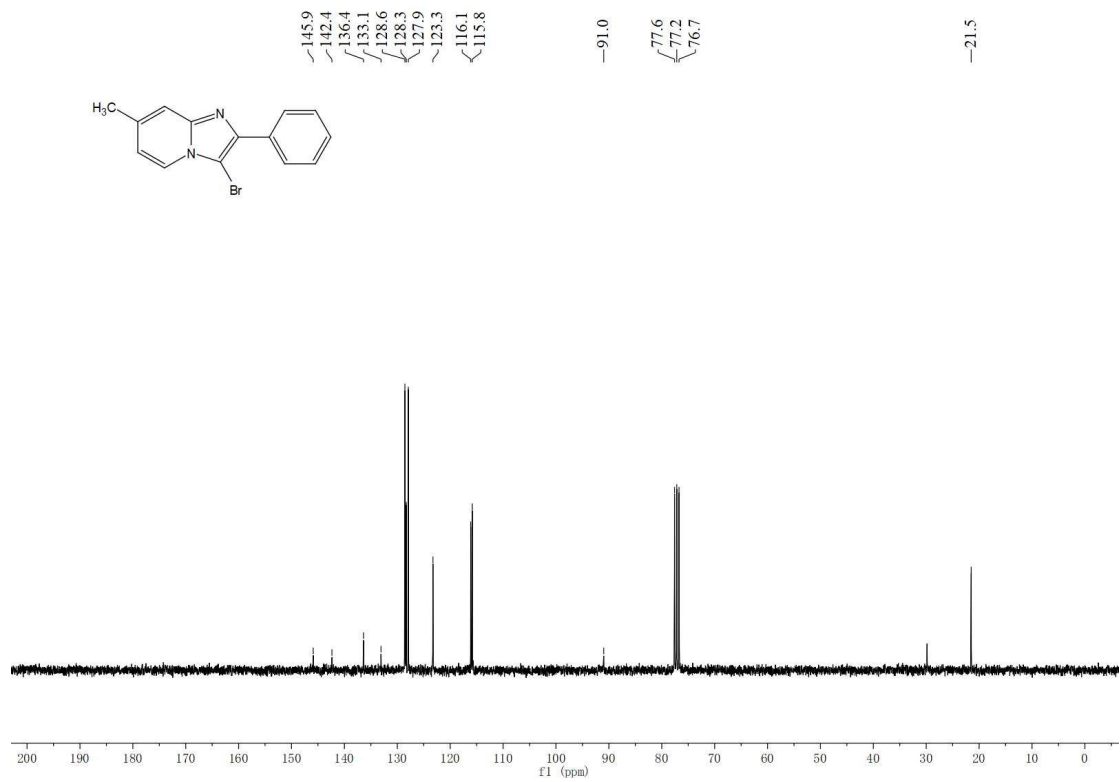

### 3-Bromo-6-methyl-2-phenylimidazo[1,2-a]pyridine (4ad)

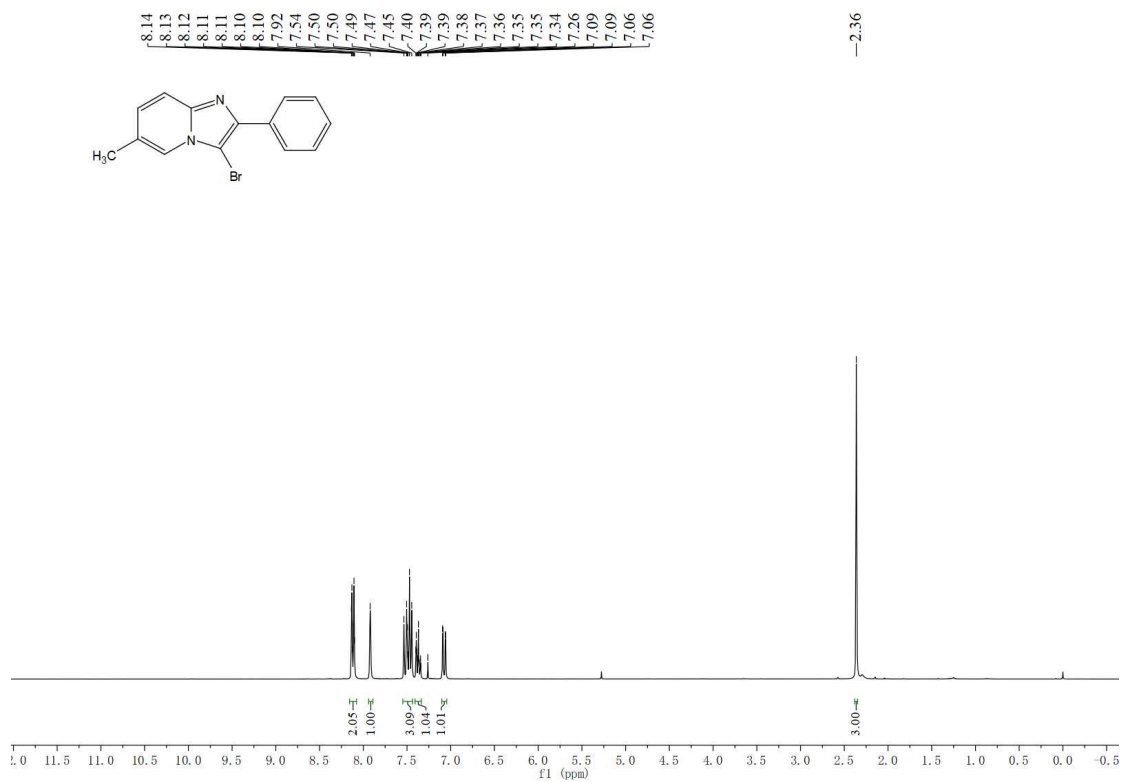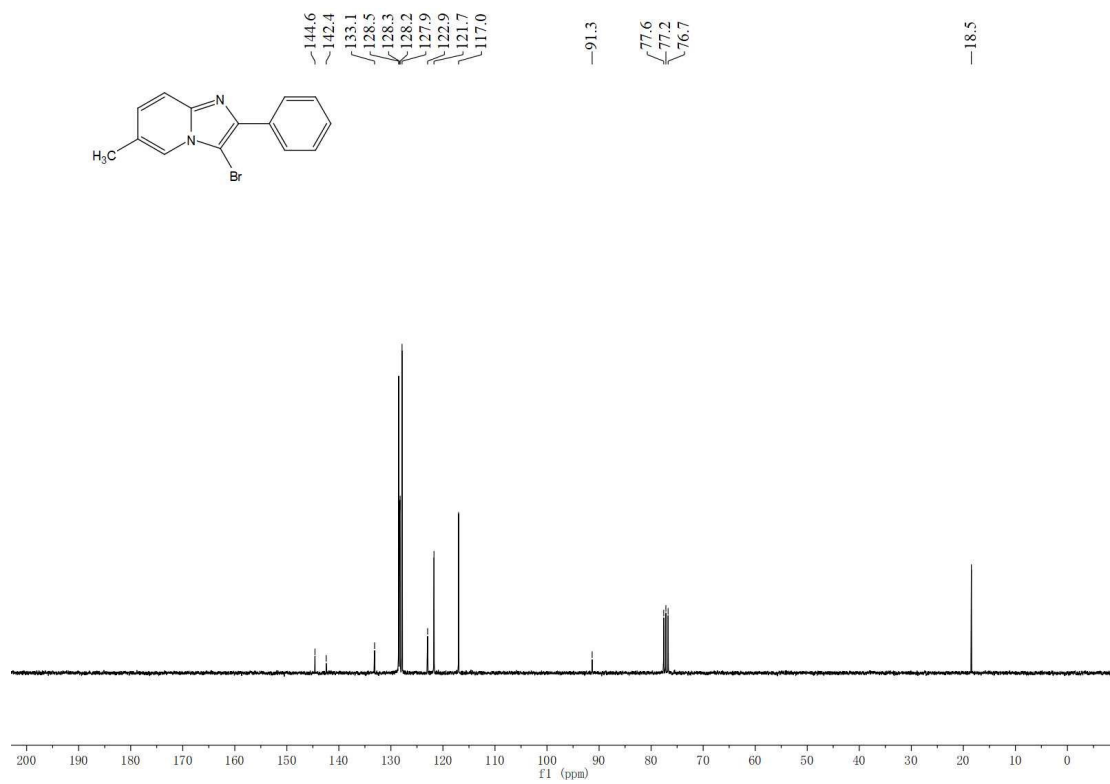

### 3-Bromo-8-fluoro-2-phenylimidazo[1,2-a]pyridine (4af)

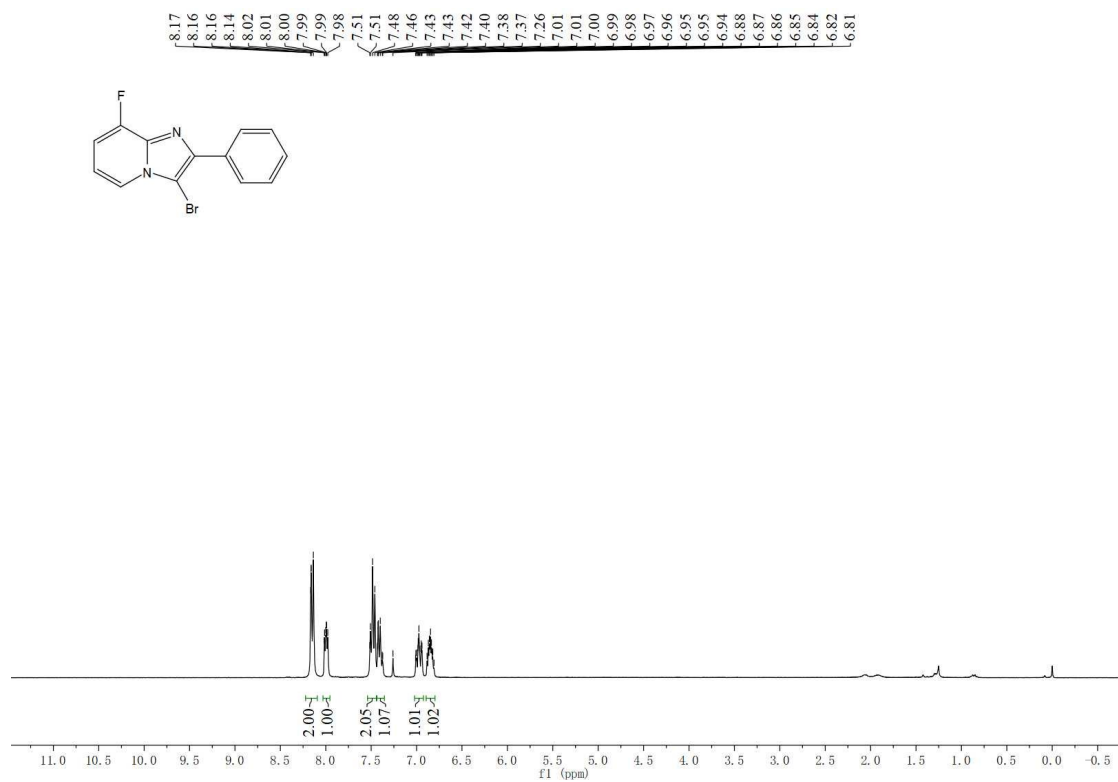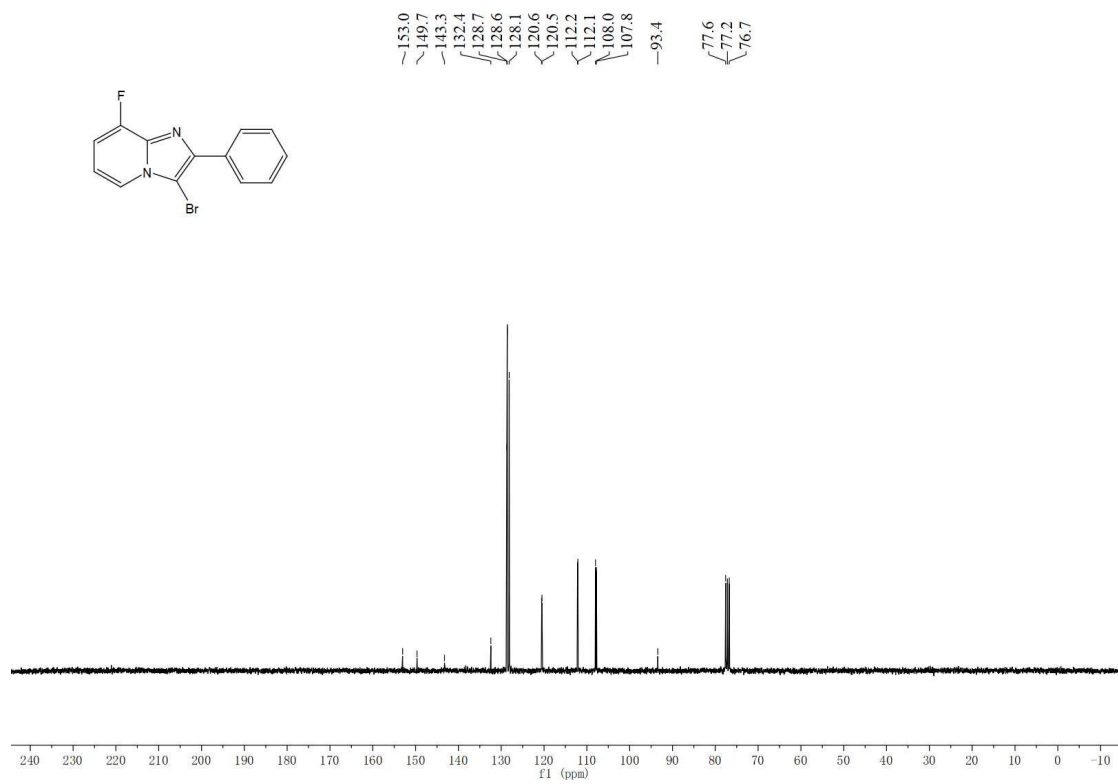



### 3-Bromo-7-methoxy-2-phenylimidazo[1,2-a]pyridine (4ag)

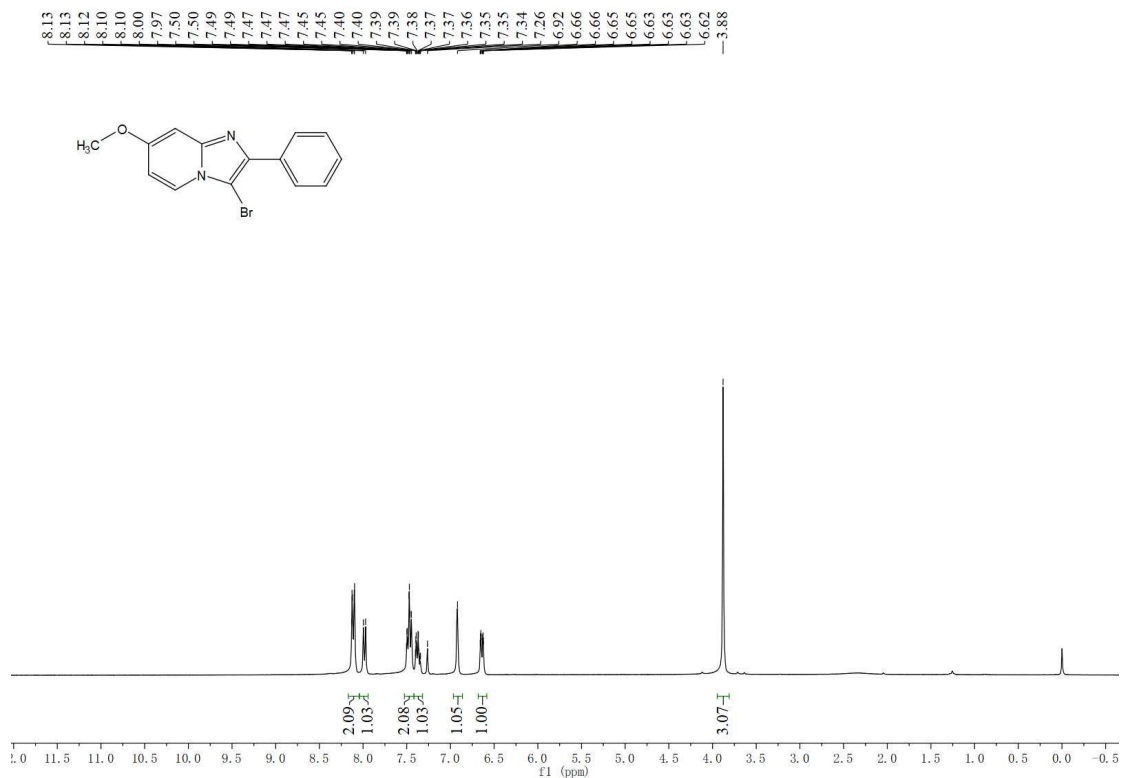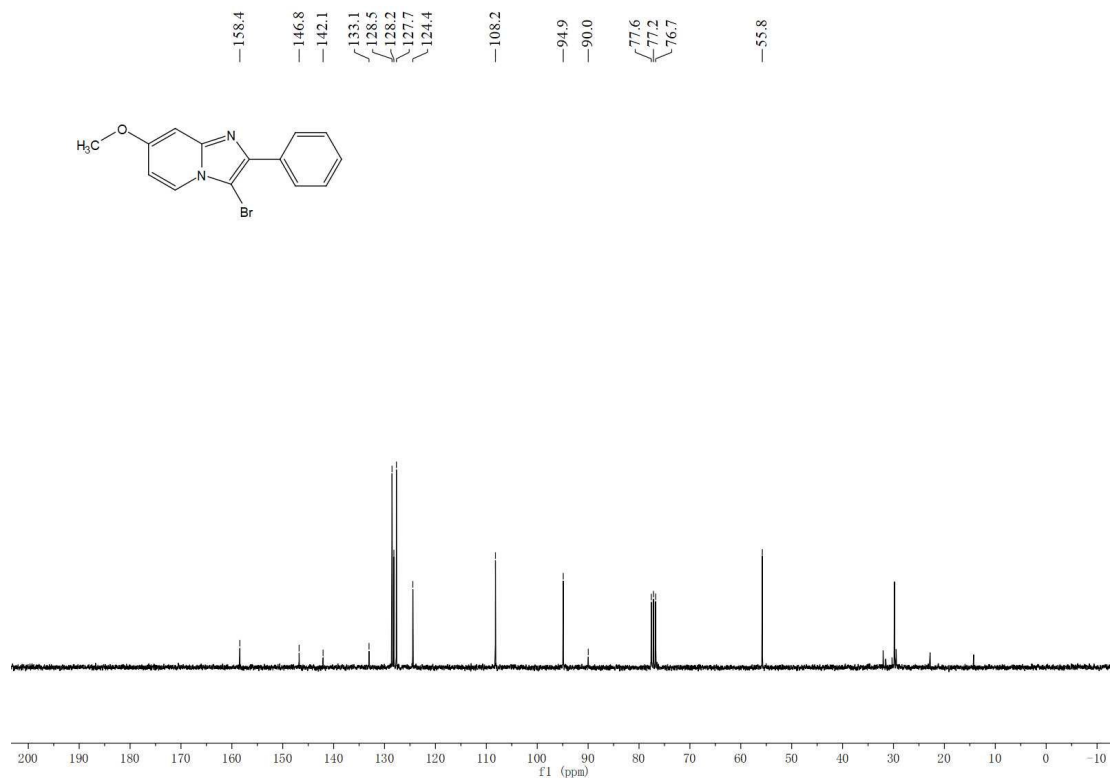

### 3-Bromo-2-phenylimidazo[2,1-a]isoquinoline (4ah)

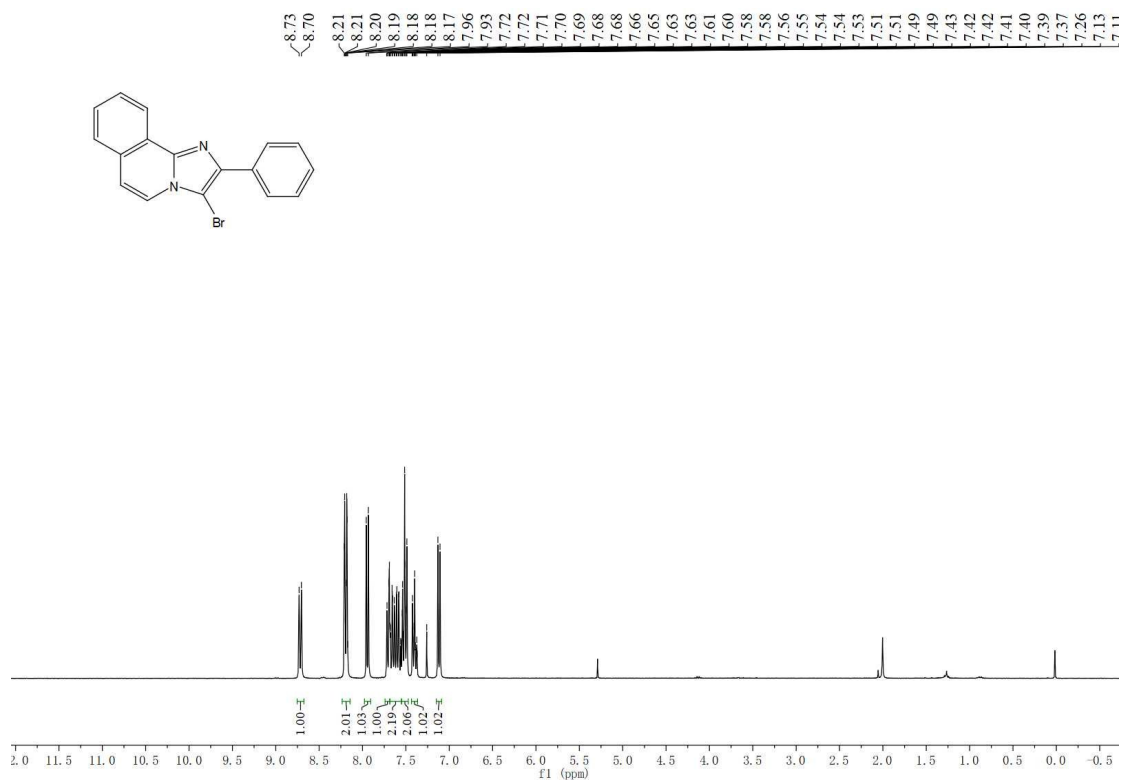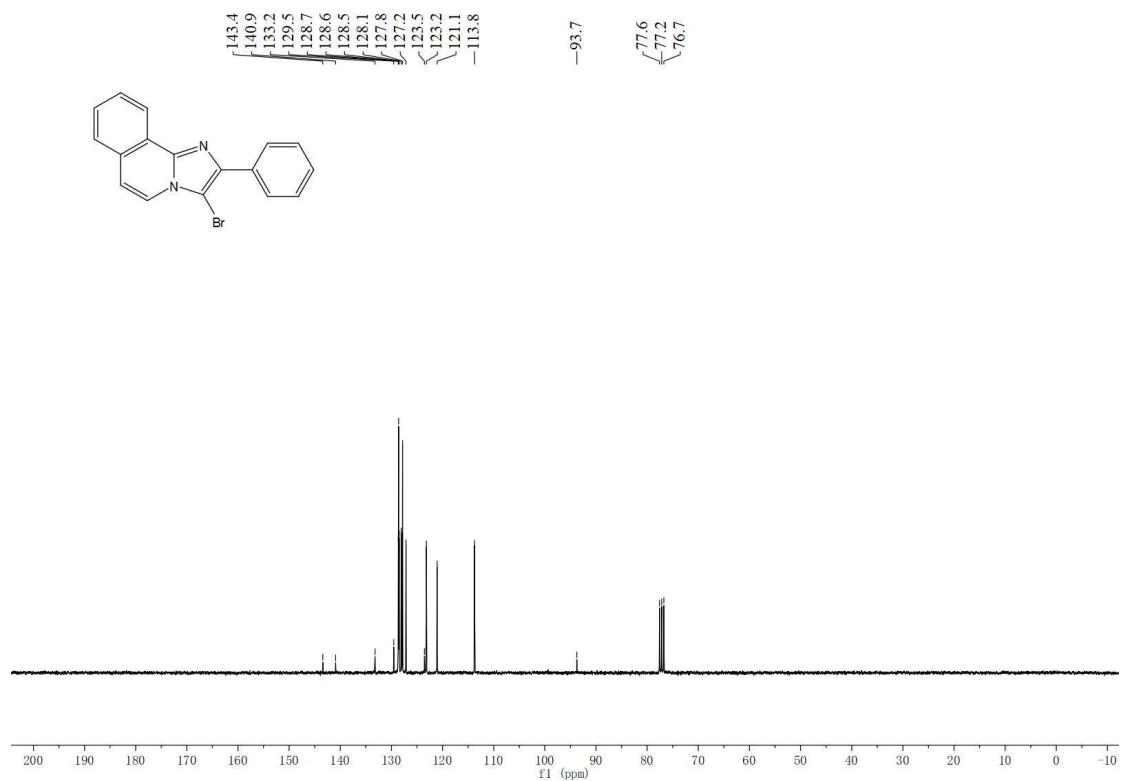

### 3-Bromo-2-(o-tolyl)imidazo[2,1-a]isoquinoline (4kh)

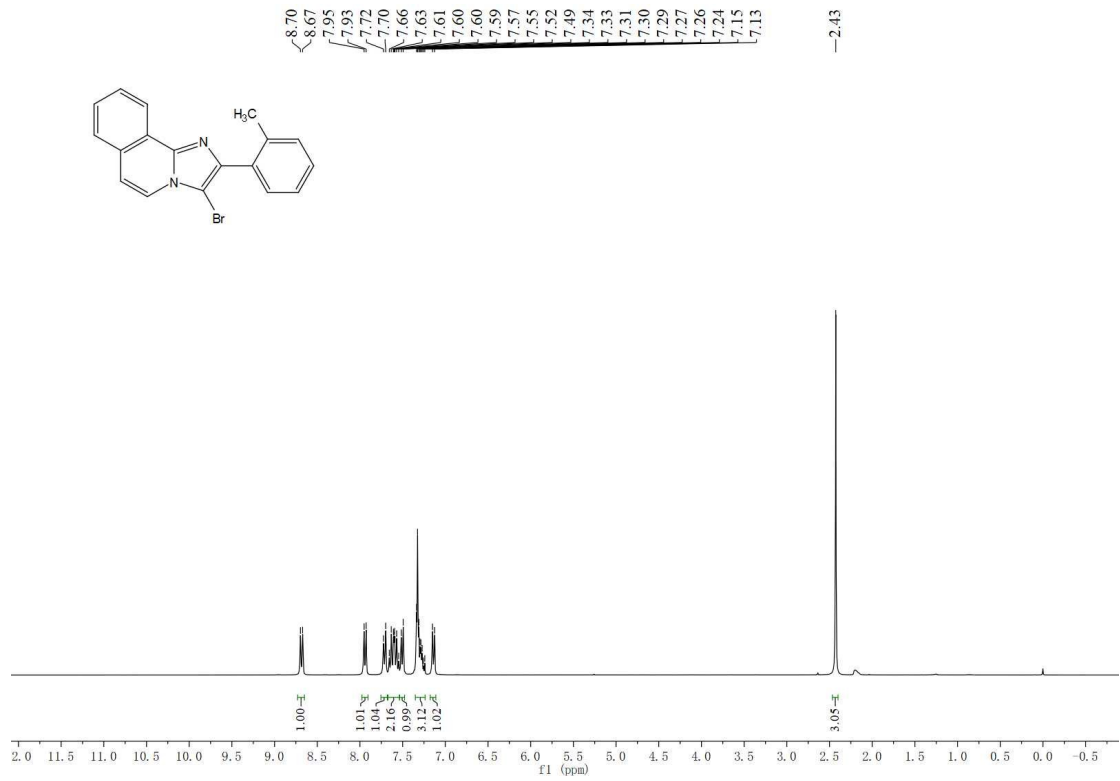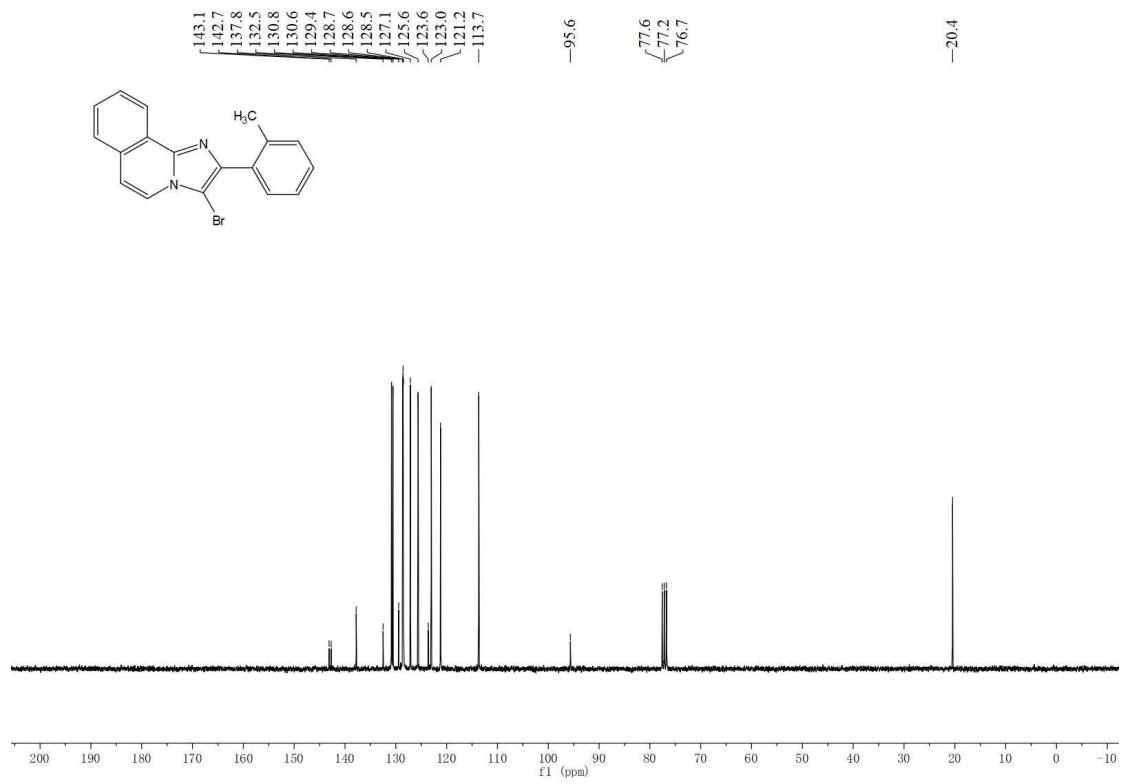

### 3-Bromo-2-(m-tolyl)imidazo[2,1-a]isoquinoline (4hh)

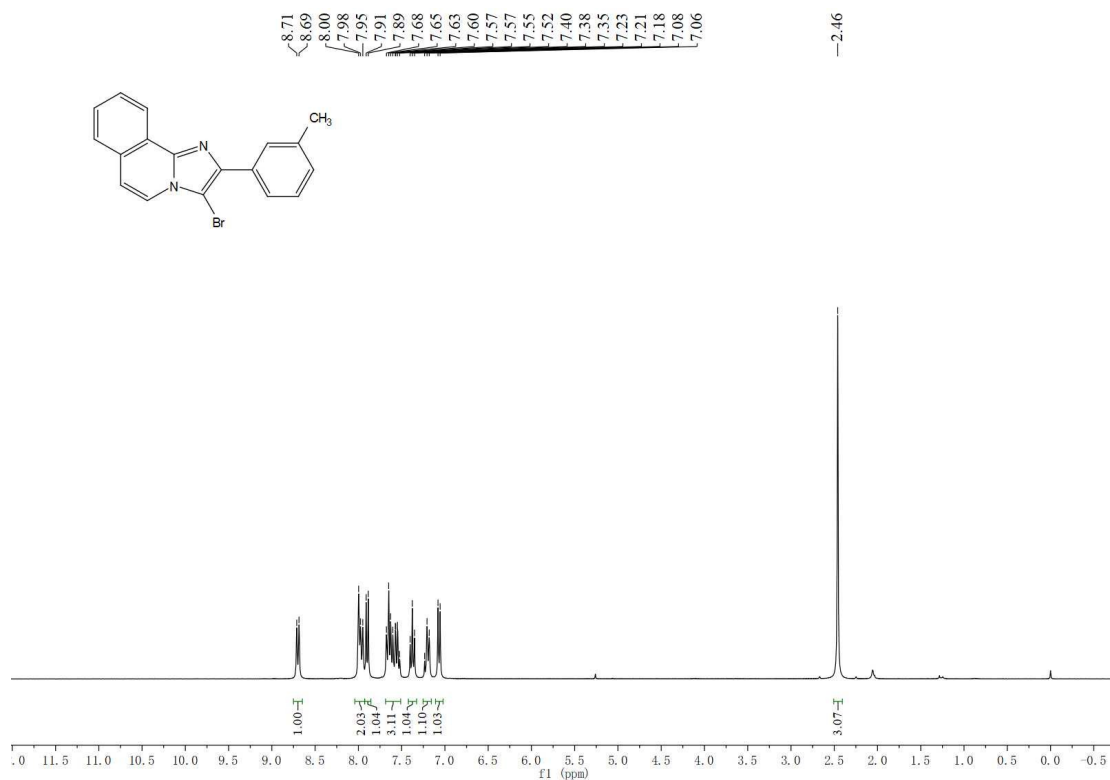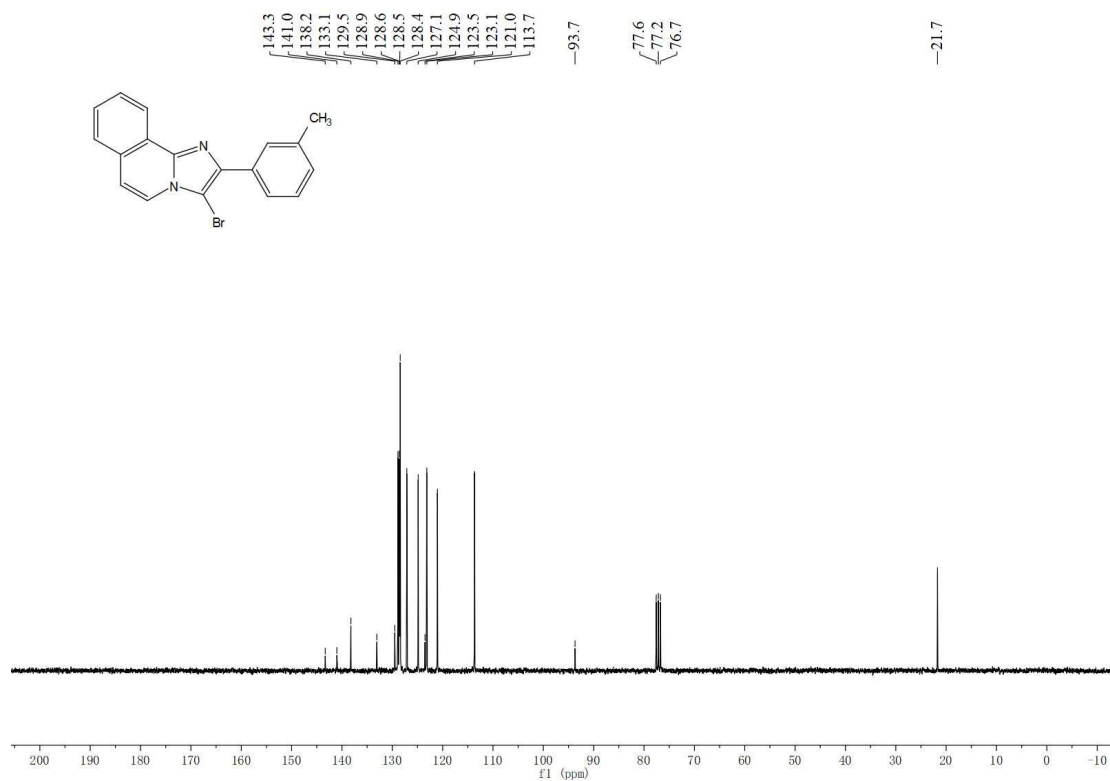

### 3-Bromo-2-(p-tolyl)imidazo[2,1-a]isoquinoline (4bh)

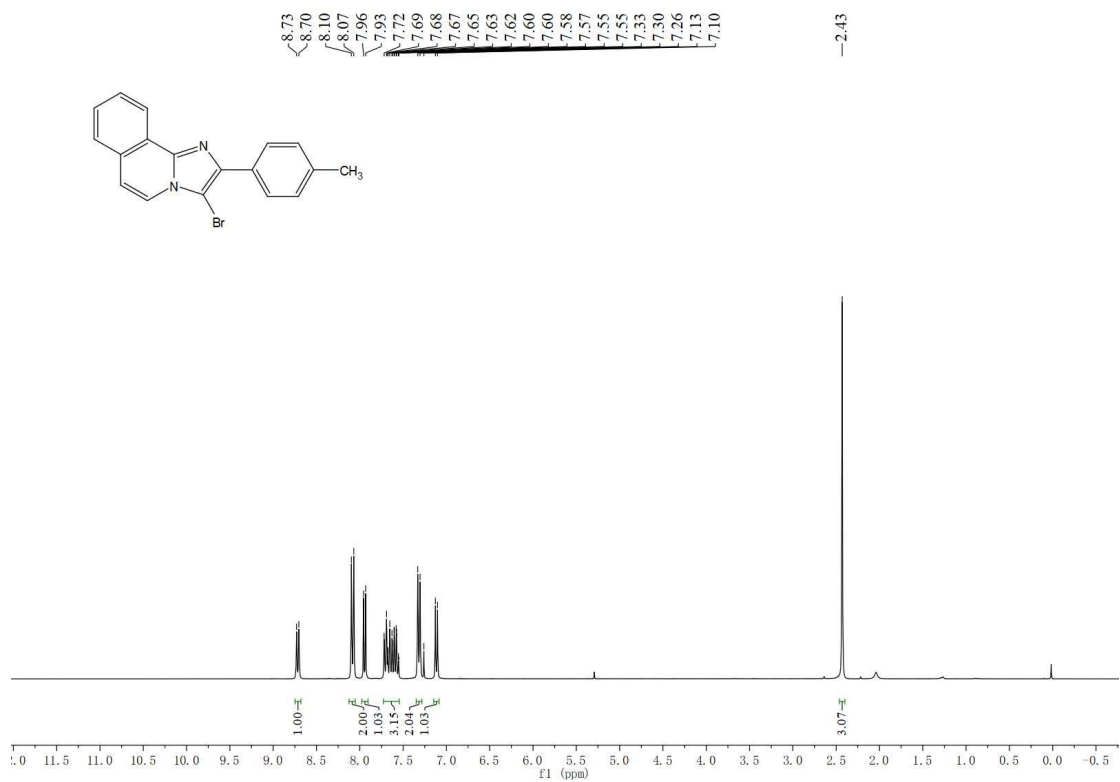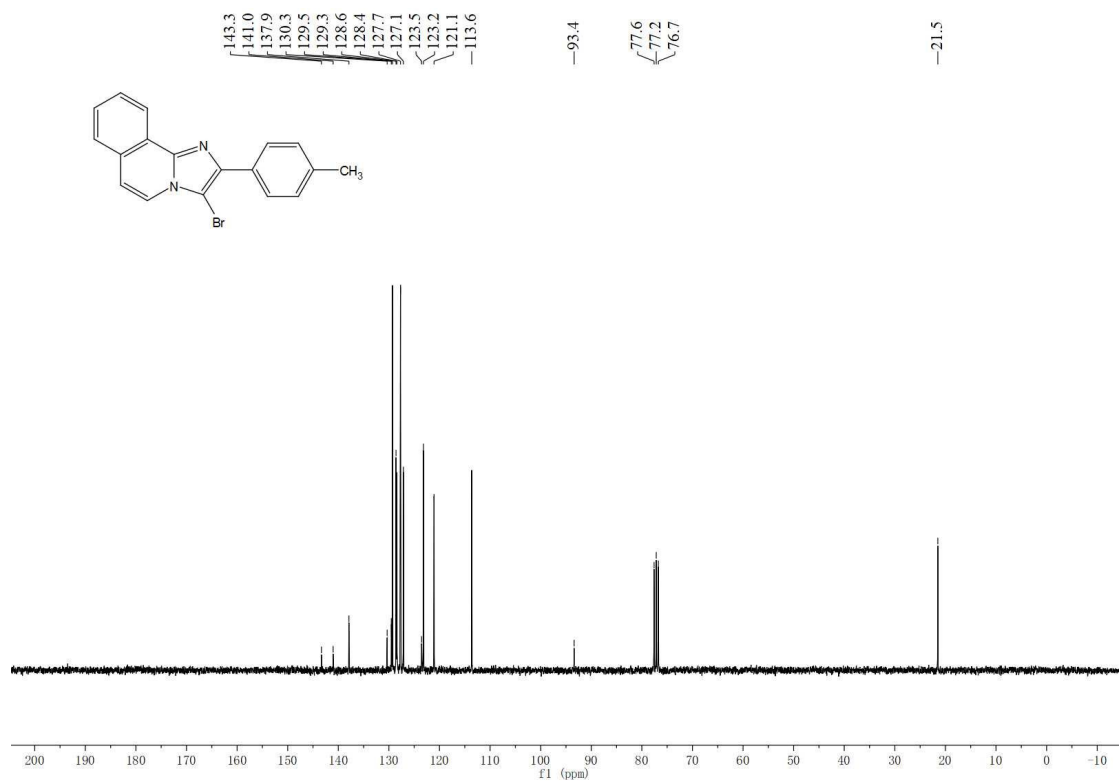

### 3-Bromo-2-(4-bromophenyl)imidazo[2,1-a]isoquinoline (4ch)

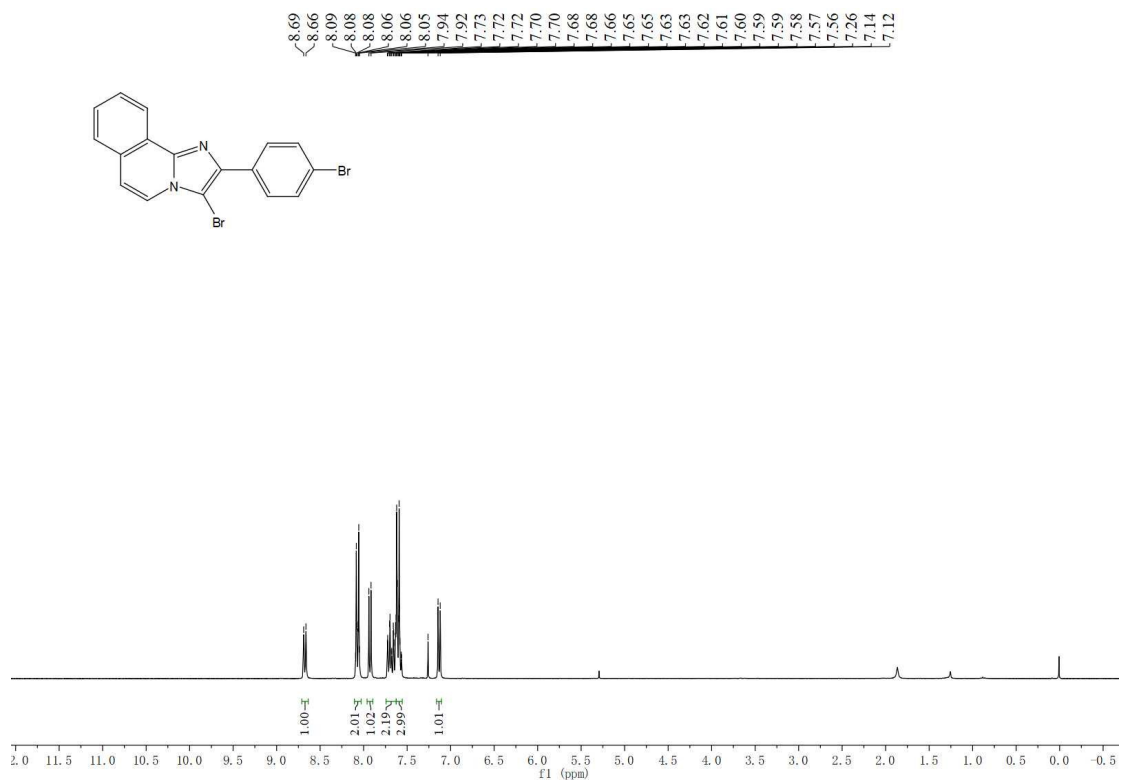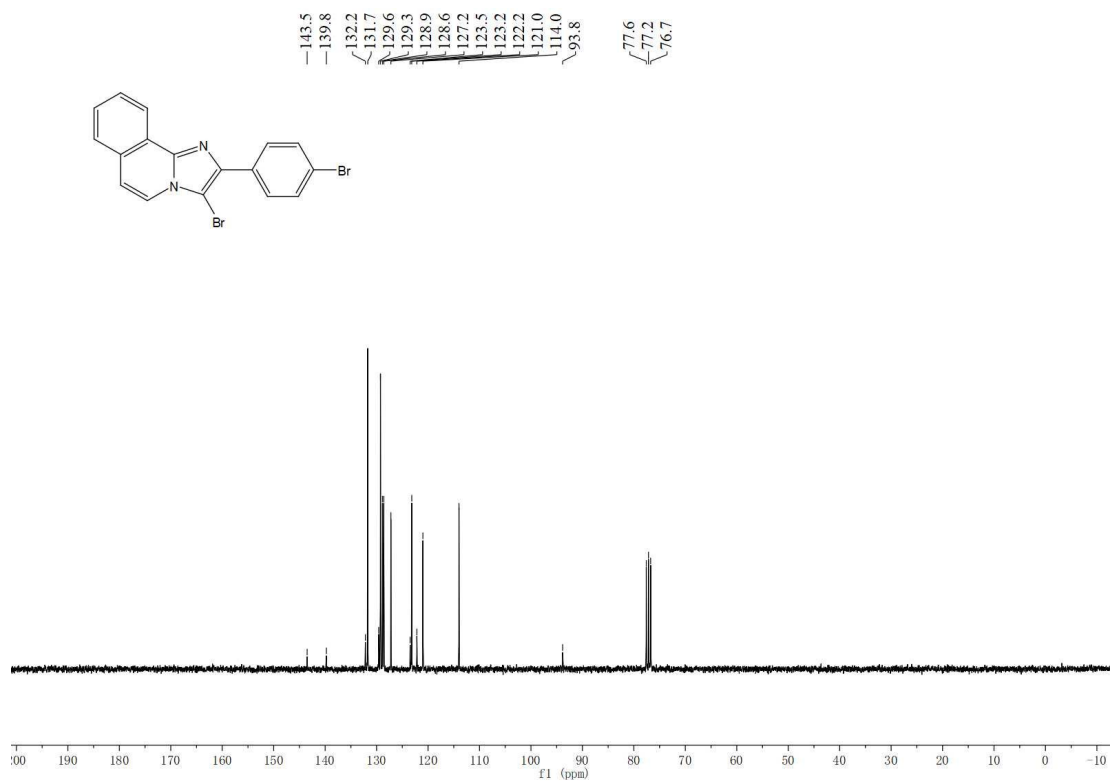

### 3-Bromo-2-(4-(trifluoromethyl)phenyl)imidazo[2,1-a]isoquinoline (4fh)

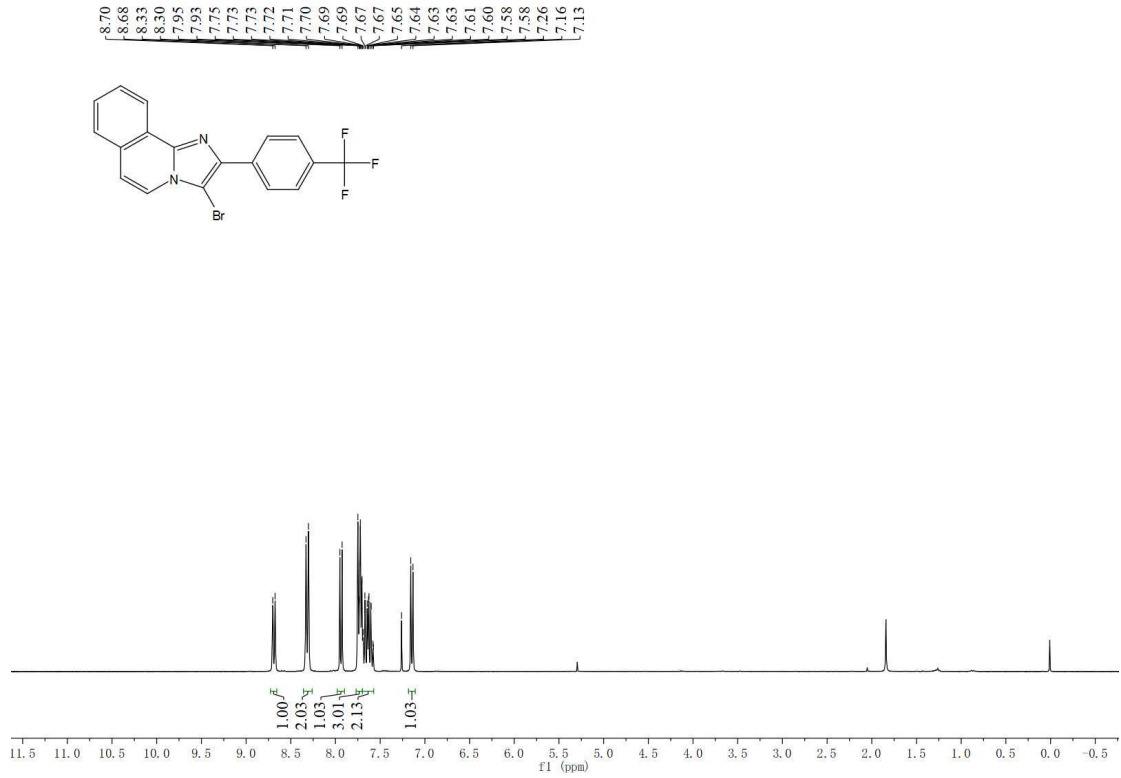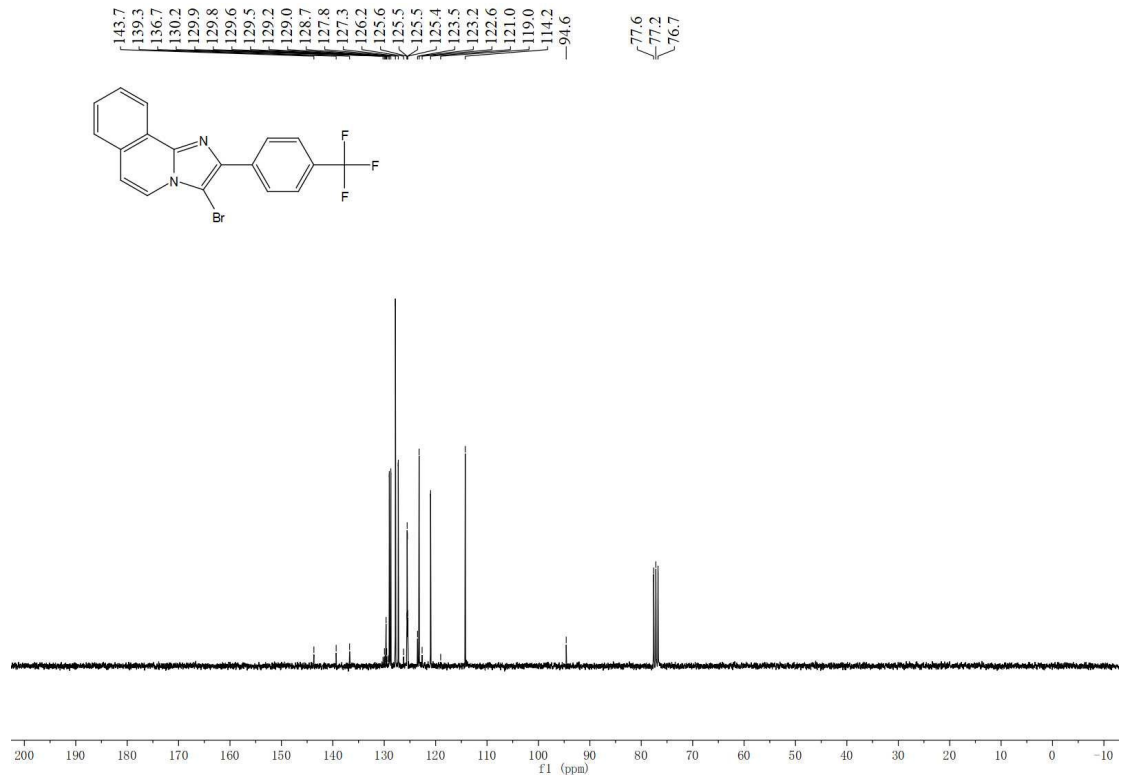

### 3-Bromo-2-(4-methoxyphenyl)imidazo[2,1-a]isoquinoline (4gh)

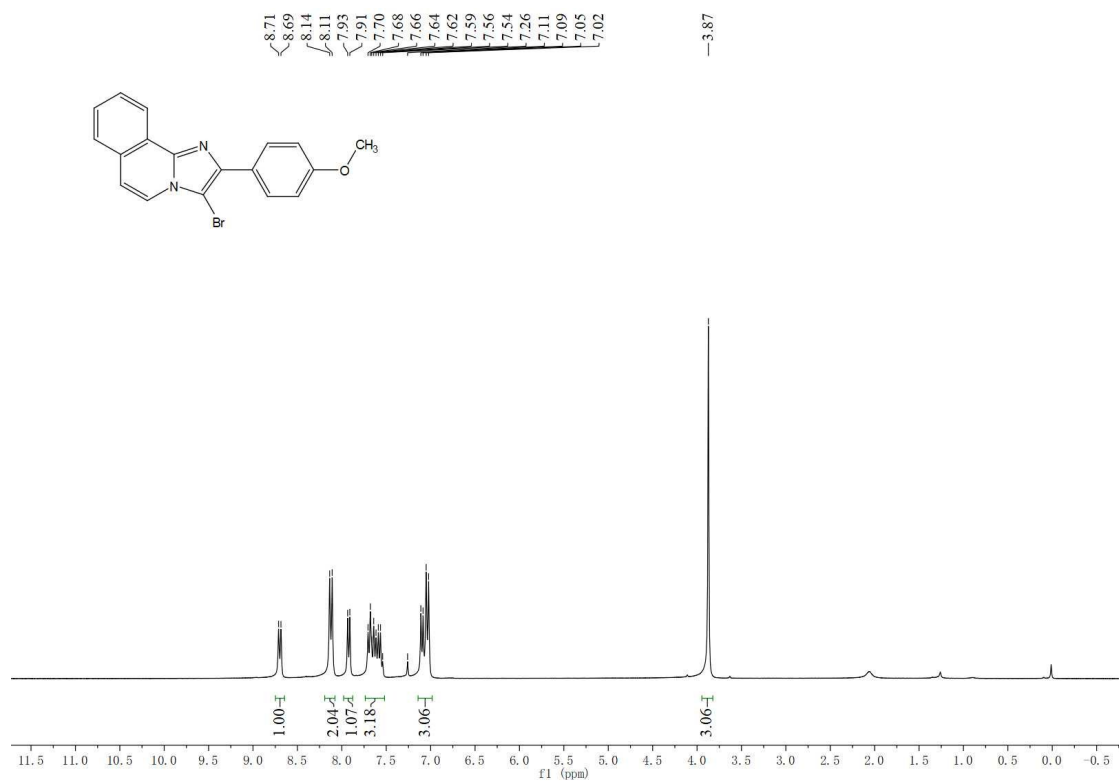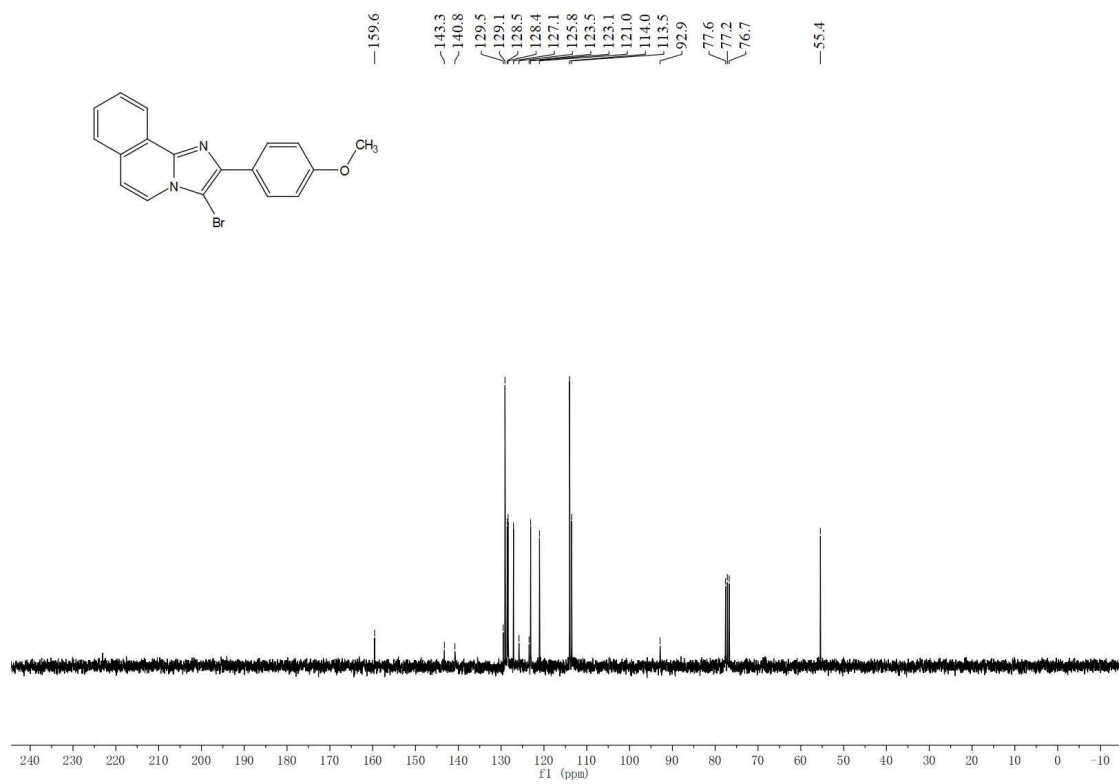



### 3-Bromo-2-phenylimidazo[1,2-a]pyrimidine (4ai)

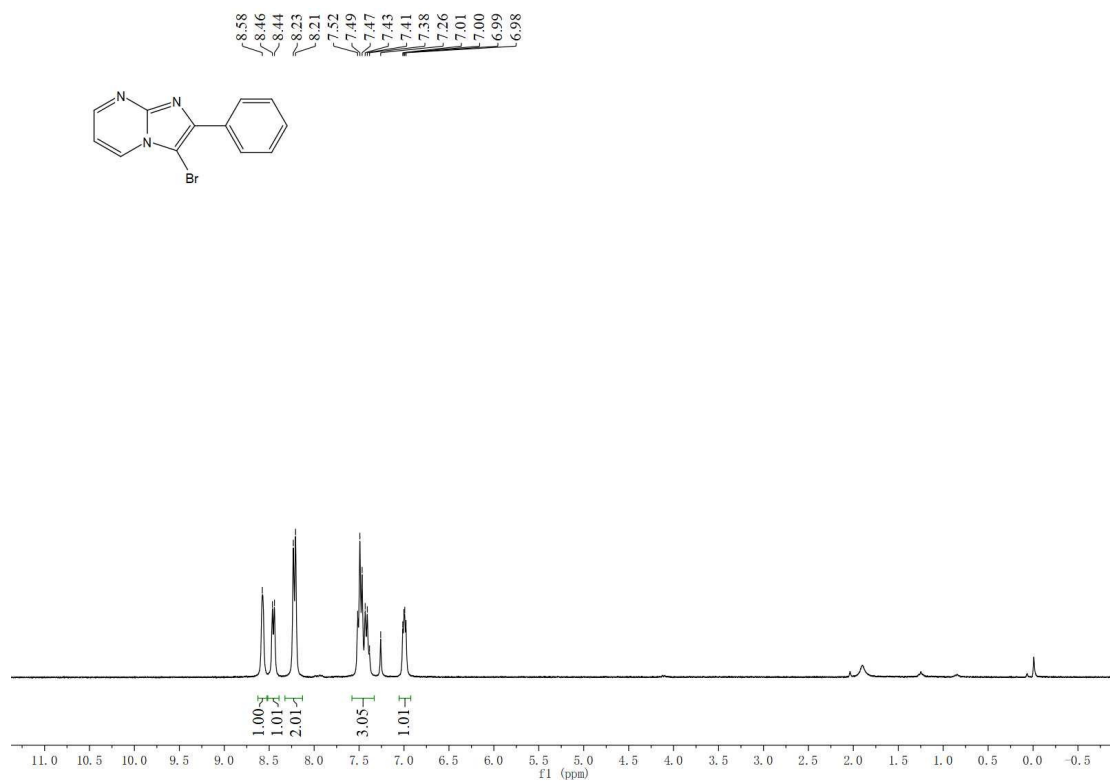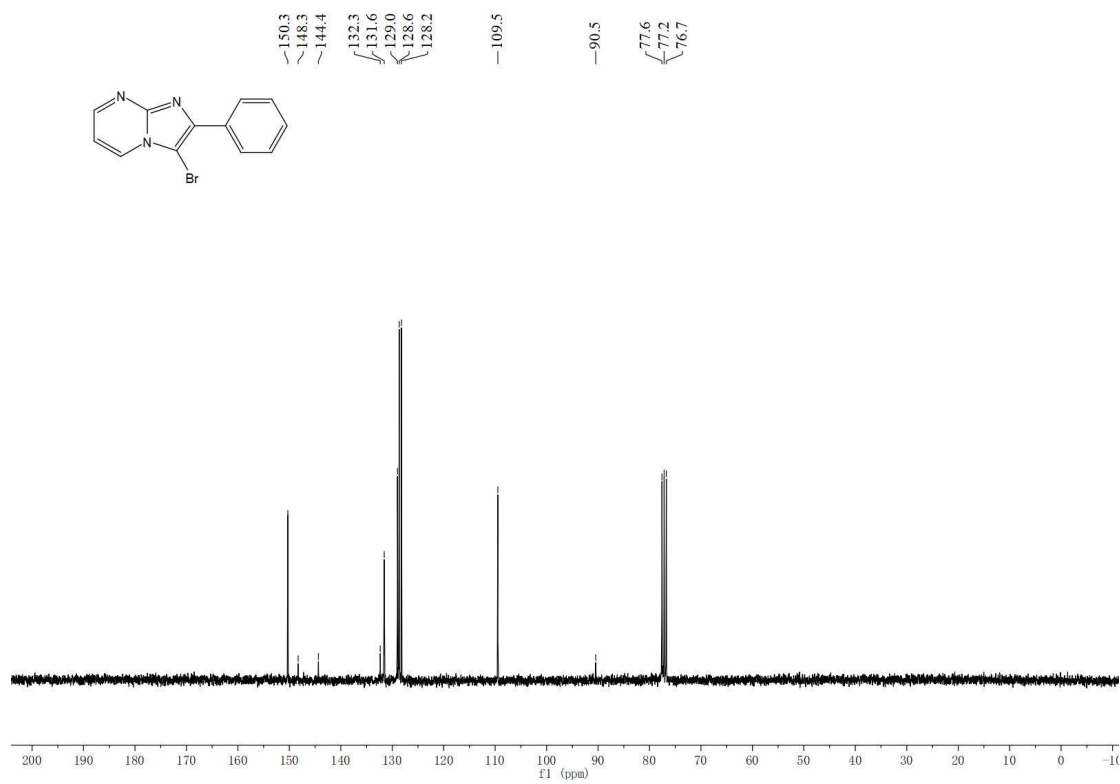

# 5-Bromo-6-phenylimidazo[2,1-b]thiazole (4aj)

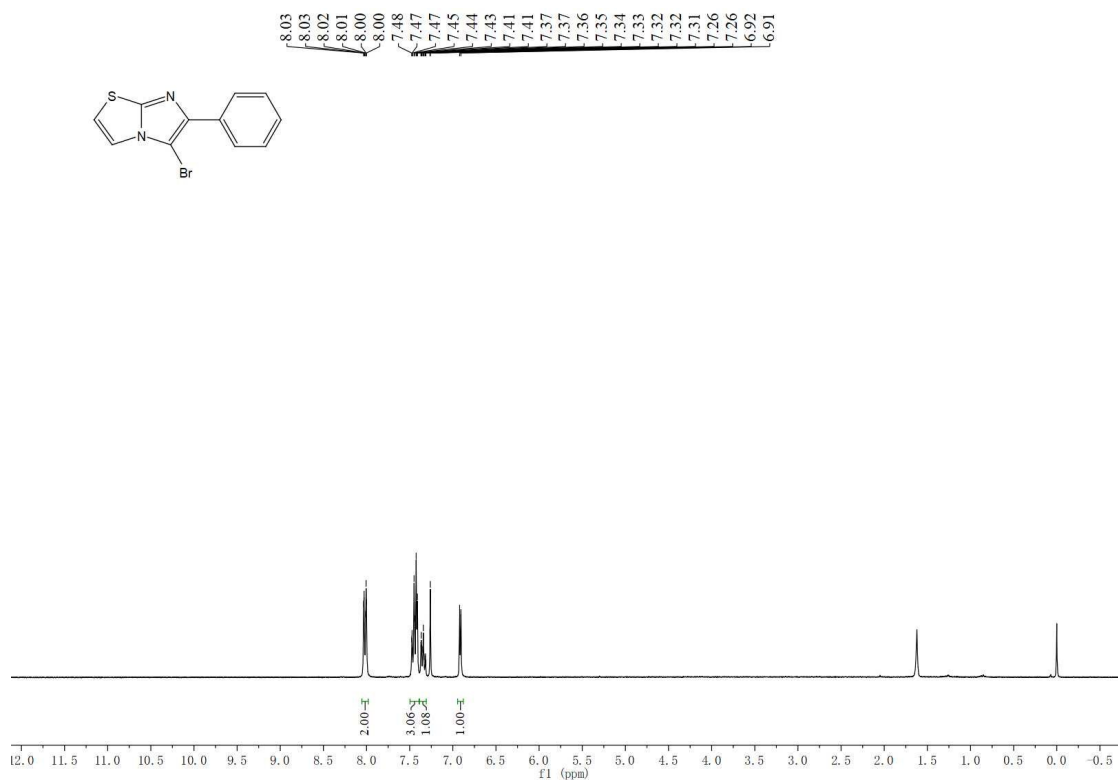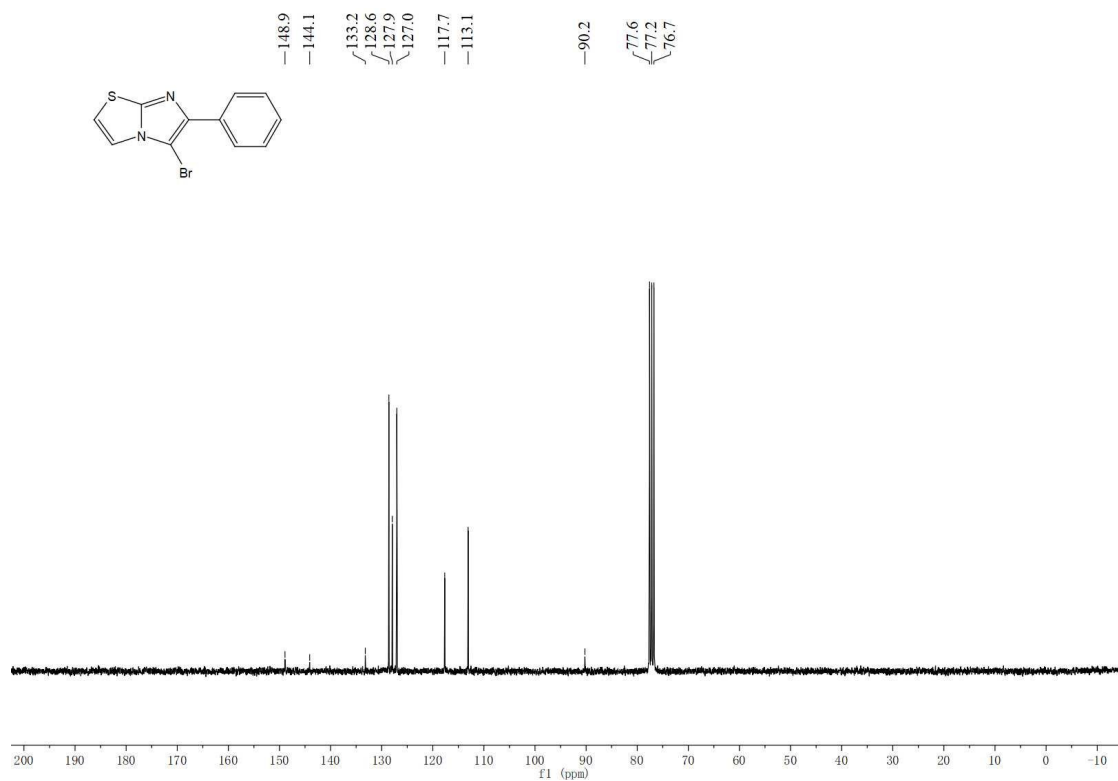

### 3-Iodo-2-phenylimidazo[1,2-a]pyridine (4sa)

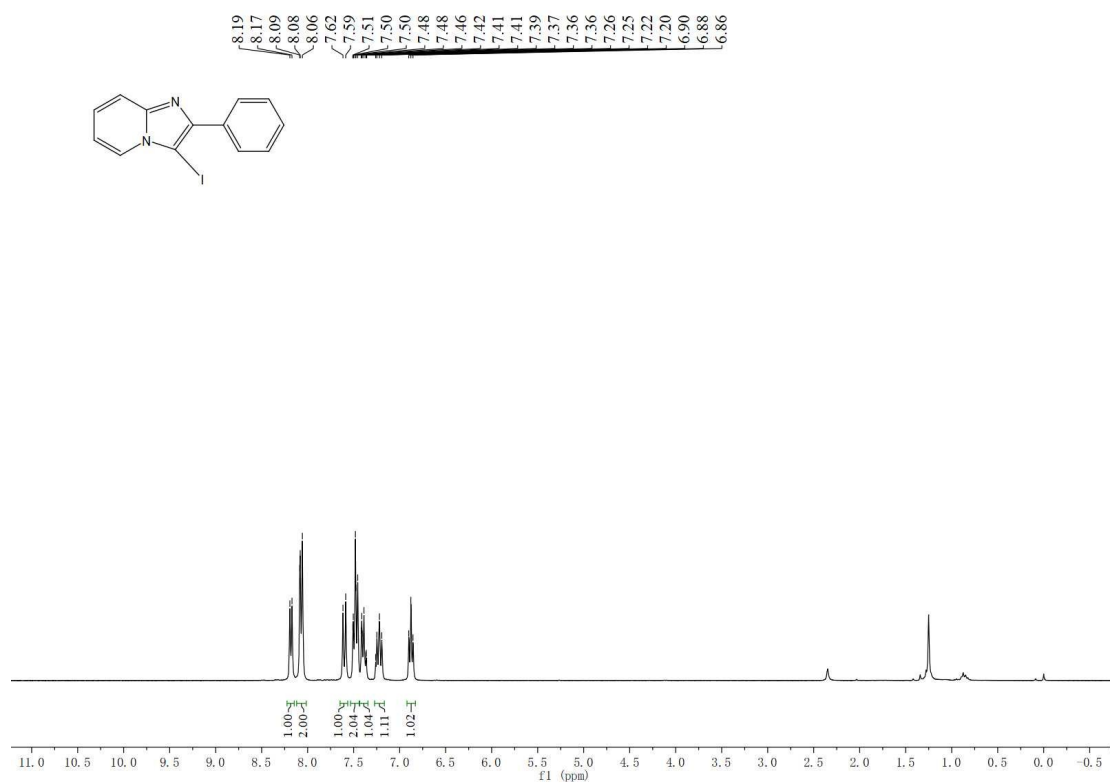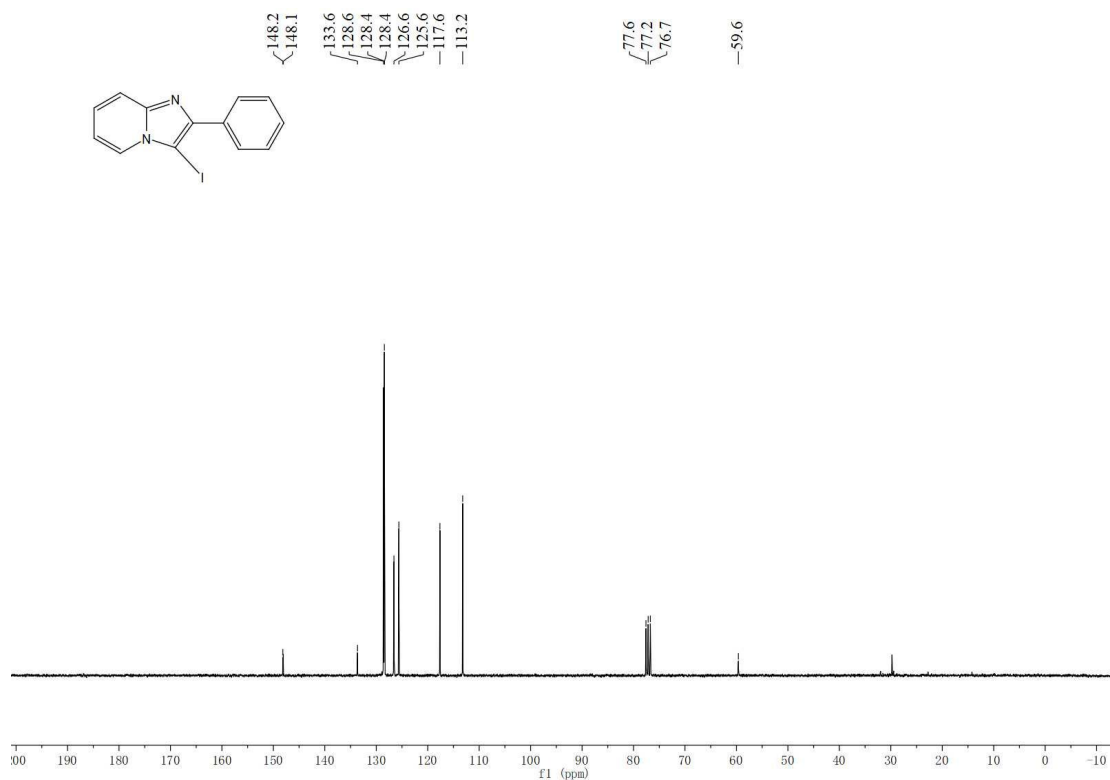

## 2,3-Diphenylimidazo[1,2-a]pyridine (6)

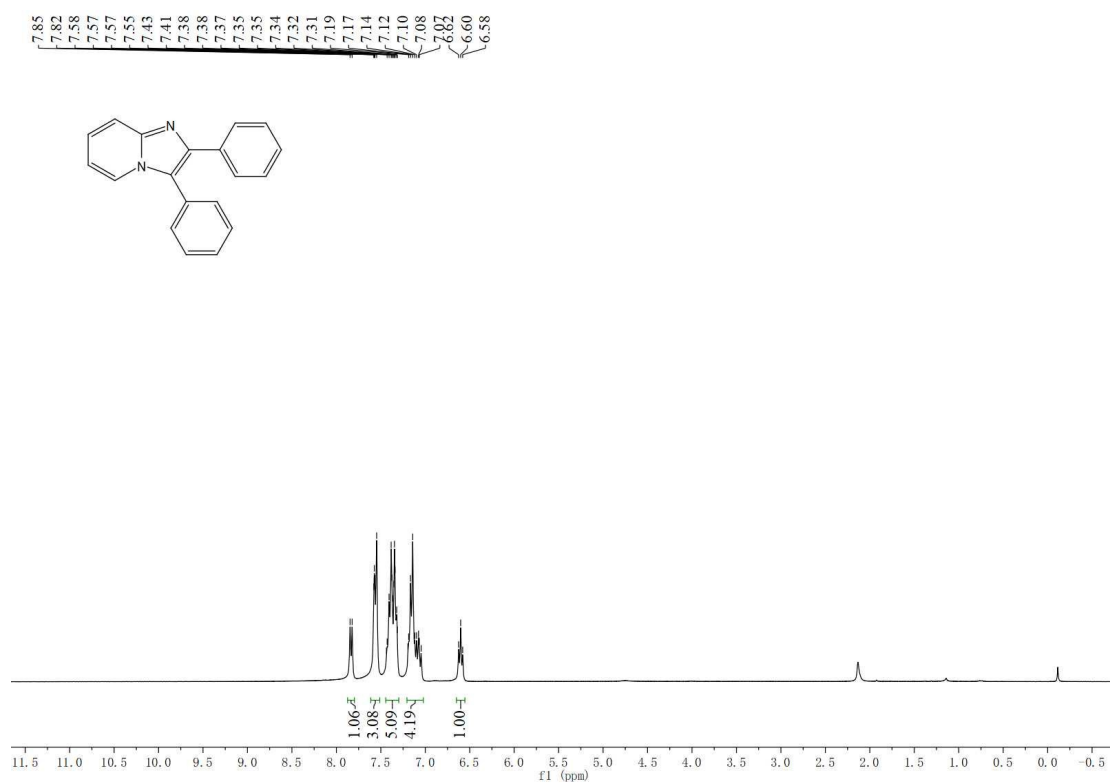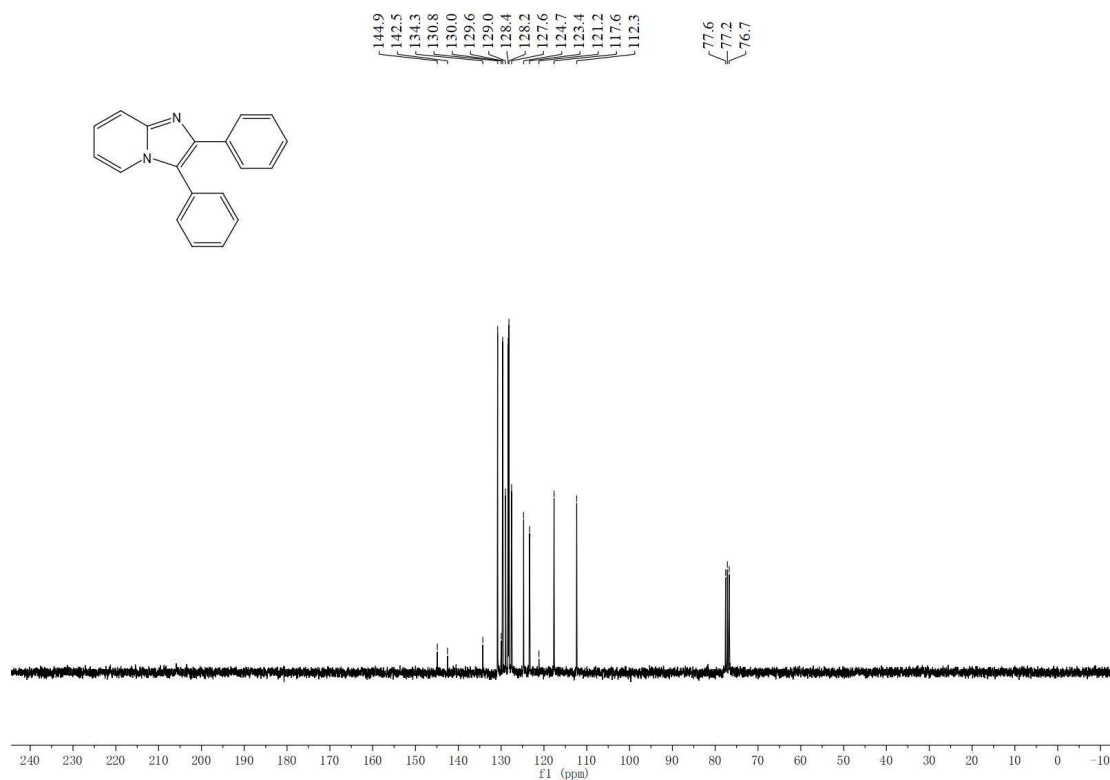

## 2-Phenyl-3-(phenylethynyl)imidazo[1,2-a]pyridine (7)

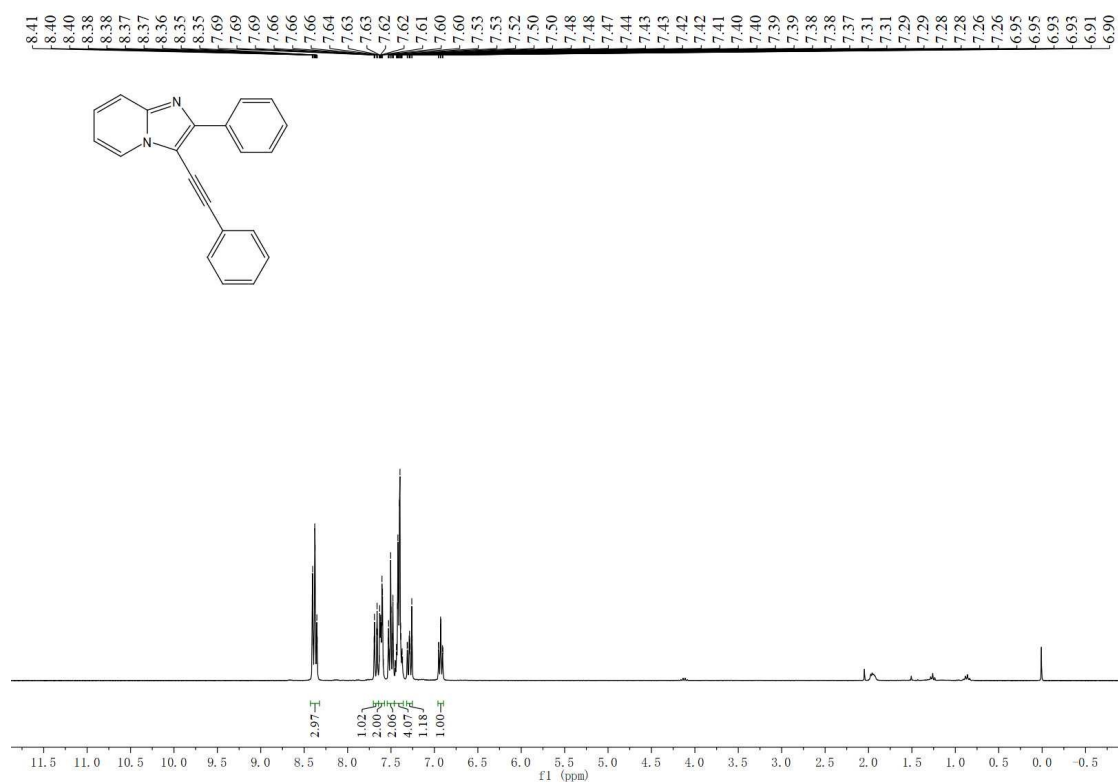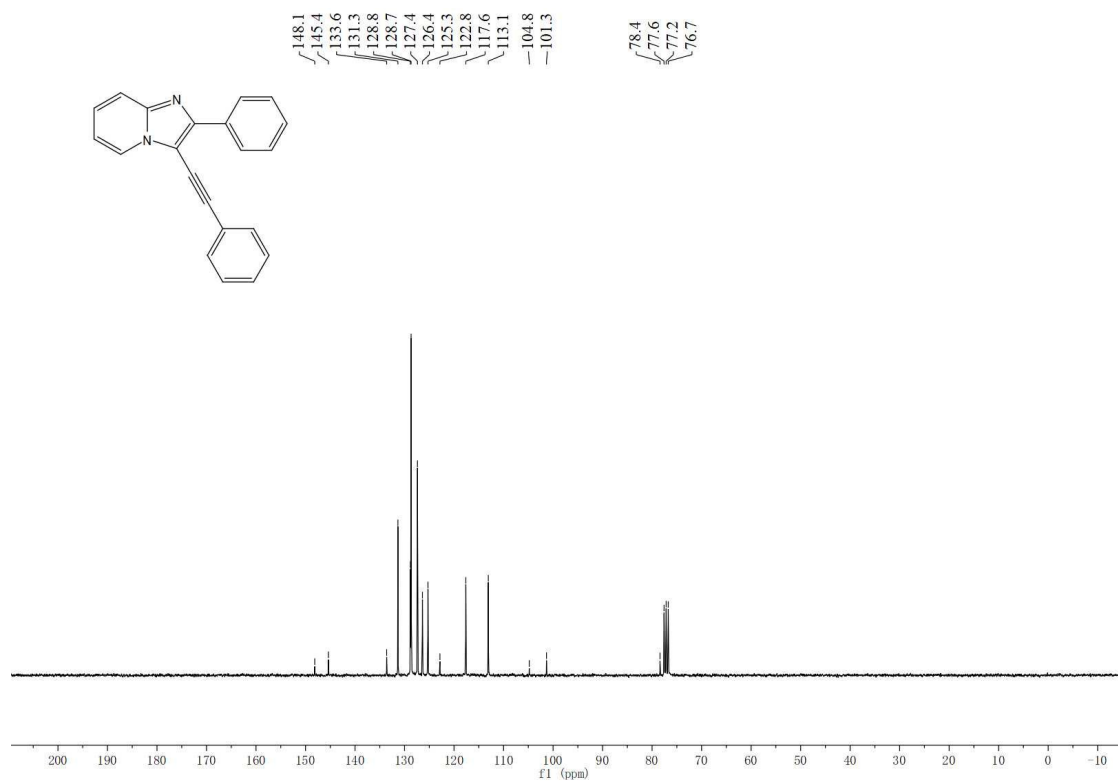

## 2-Phenylimidazo[1,2-a]pyridine (5aa)

8.12  
8.09  
7.98  
7.97  
7.97  
7.95  
7.85  
7.66  
7.63  
7.47  
7.46  
7.44  
7.44  
7.42  
7.42  
7.36  
7.36  
7.35  
7.34  
7.33  
7.32  
7.31  
7.30  
7.26  
7.19  
7.17  
7.17  
7.16  
7.16  
7.14  
7.14  
6.79  
6.77  
6.75

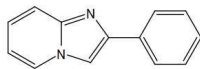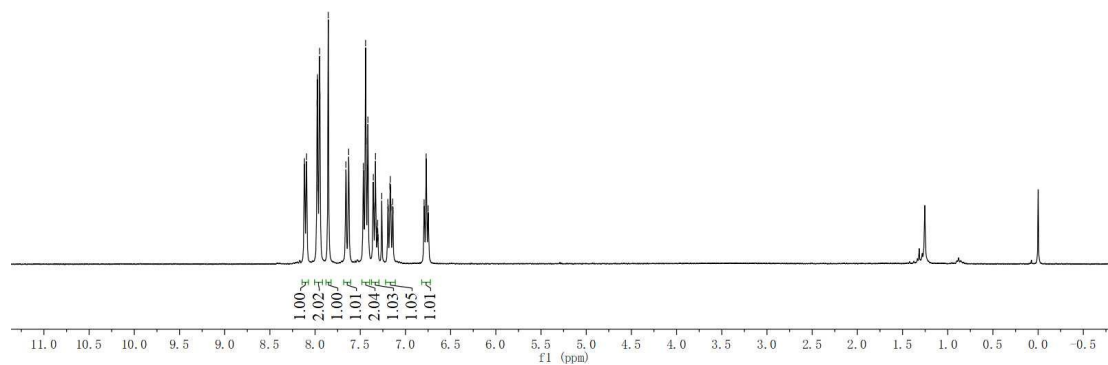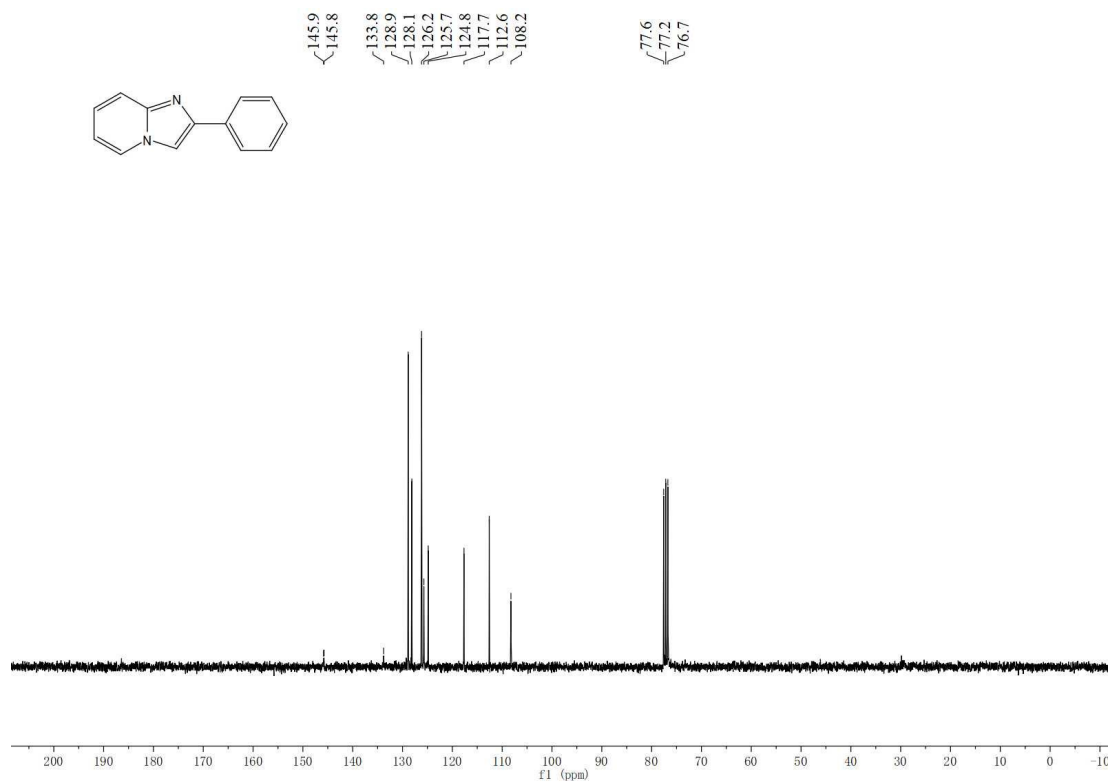

Supplement: c9ra06724h1.pdf [file c9ra06724h1.pdf]
